# Supplementary material
Source: PubMed Central journal article supplement (PMC7551711)
Supplement: pt0c00096_si_001.pdf [file pt0c00096_si_001.pdf]

*Electronic Supporting Information*

**Cyclohepta[*b*]thiophenes as potential antiproliferative agents: Design, synthesis, *in vitro* and *in vivo* anticancer evaluation**

Somaya A. Abdel-Rahman<sup>1,2</sup>, Ashraf K. El-Damasy<sup>2,\*</sup>, Ghada S. Hassan<sup>2</sup>, Emad I. Wafa<sup>1</sup>, Sean M. Geary<sup>1</sup>, Azza R. Maarouf<sup>2</sup>, Aliasger K. Salem<sup>1,\*</sup>

<sup>1</sup>*Department of Pharmaceutical Sciences and Experimental Therapeutics, College of Pharmacy, University of Iowa, Iowa City, IA 52242, USA*

<sup>2</sup>*Department of Medicinal Chemistry, Faculty of Pharmacy, Mansoura University, Mansoura 35516, Egypt*

Contents:

Spectral data ( $^1\text{HMR}$ ,  $^{13}\text{CNMR}$  and HRMS) of the synthesized compounds

S-3

Figure S-1.  $^{13}\text{CNMR}$  of compound 3

Figure S-2. HRMS of compound 3

Figure S-3.  $^{13}\text{CNMR}$  of compound 4

Figure S-4. HRMS of compound 4

Figure S-5.  $^1\text{HNMR}$  of compound 5

Figure S-6. HRMS of compound 5

Figure S-7.  $^1\text{HNMR}$  of compound 6

Figure S-8.  $^{13}\text{CNMR}$  of compound 6

Figure S-9. HRMS of compound 6

Figure S-10.  $^{13}\text{CNMR}$  of compound 7

Figure S-11. HRMS of compound 7

Figure S-12.  $^1\text{HNMR}$  of compound 8

Figure S-13.  $^{13}\text{CNMR}$  of compound 8

Figure S-14. HRMS of compound 8

Figure S-15.  $^1\text{HNMR}$  of compound 9

Figure S-16.  $^{13}\text{CNMR}$  of compound 9

Figure S-17. HRMS of compound 9

Figure S-18.  $^1\text{HNMR}$  of compound 10

Figure S-19.  $^{13}\text{CNMR}$  of compound 10

Figure S-20. HRMS of compound 10

Figure S-21.  $^1\text{HNMR}$  of compound 11

Figure S-22.  $^{13}\text{CNMR}$  of compound 11

Figure S-23. HRMS of compound 11

Figure S-24.  $^1\text{HNMR}$  of compound 12

Figure S-25.  $^{13}\text{CNMR}$  of compound 12

Figure S-26.  $^1\text{HNMR}$  of compound 13

Figure S-27.  $^{13}\text{CNMR}$  of compound 13

Figure S-28. HRMS of compound 13

Figure S-29.  $^1\text{H}$ NMR of compound 14

Figure S-30. HRMS of compound 14

Figure S-31.  $^1\text{H}$ NMR of compound 15

Figure S-32.  $^{13}\text{C}$ NMR of compound 15

Figure S-33. HRMS of compound 15

Figure S-34.  $^1\text{H}$ NMR of compound 16

Figure S-35.  $^{13}\text{C}$ NMR of compound 16

Figure S-36. HRMS of compound 16

Figure S-37.  $^1\text{H}$ NMR of compound 17

Figure S-38.  $^{13}\text{C}$ NMR of compound 17

Figure S-39. HRMS of compound 17

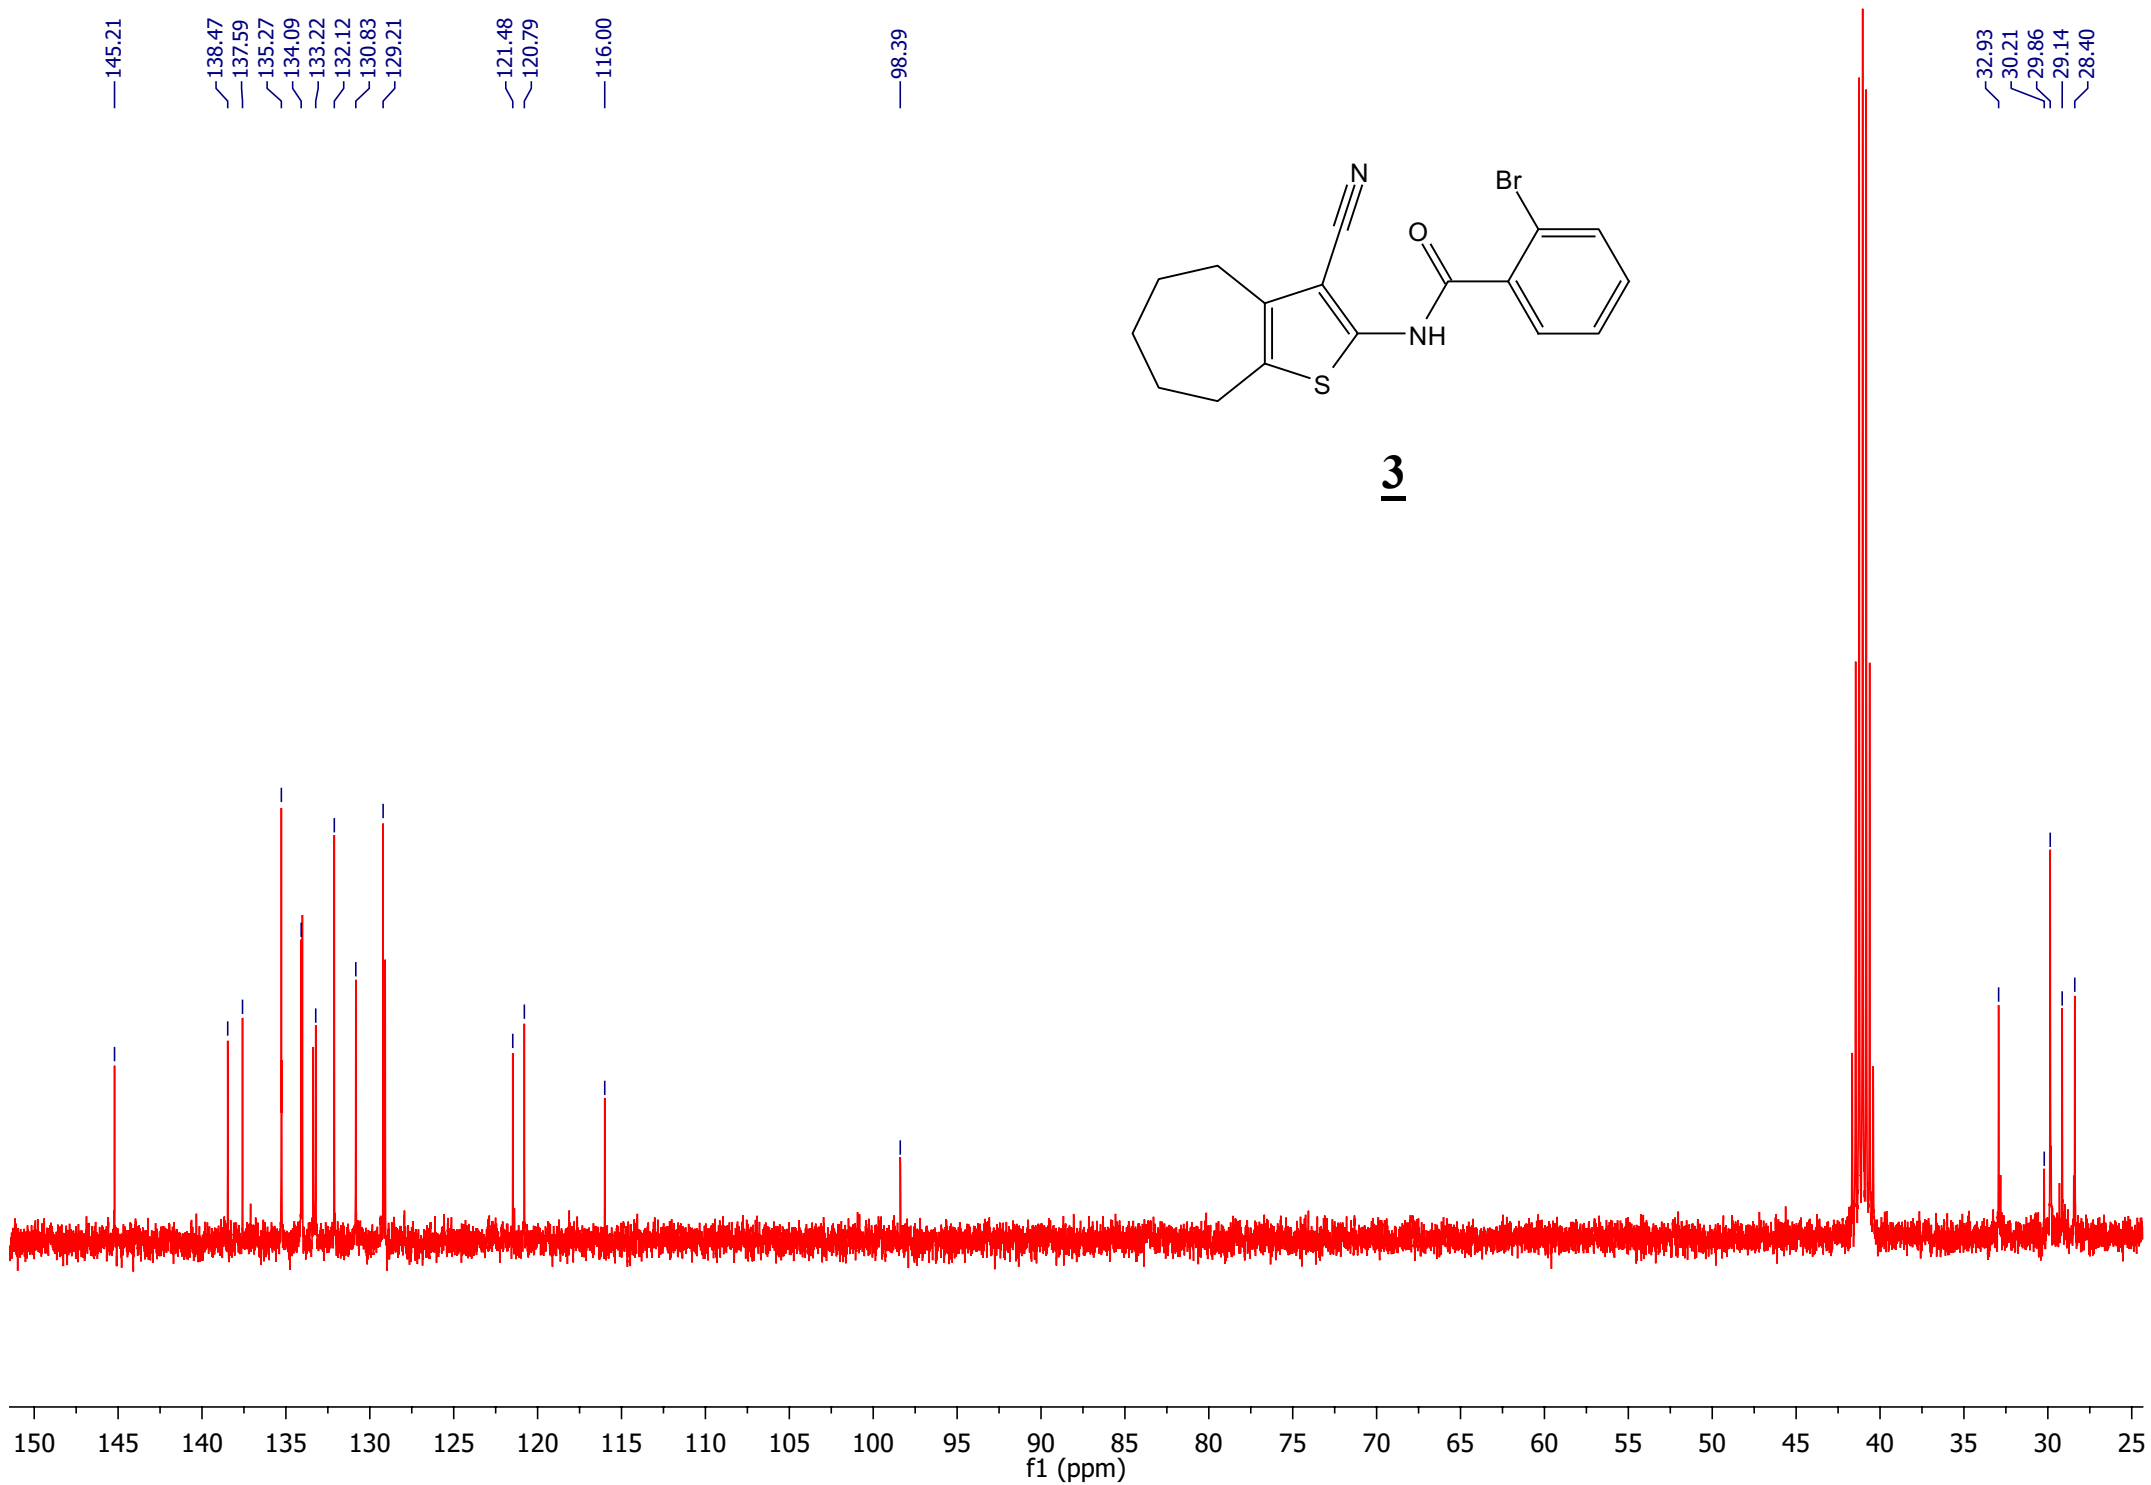

Figure S-1.  $^{13}\text{C}$ NMR of compound 3

# Elemental Composition Report

## Single Mass Analysis

Tolerance = 5.0 mDa / DBE: min = -5.0, max = 100.0

Element prediction: Off

Number of isotope peaks used for i-FIT = 5

Monoisotopic Mass, Even Electron Ions

1162 formula(e) evaluated with 15 results within limits (all results (up to 1000) for each mass)

Elements Used:

C: 1-100 H: 1-200 N: 0-5 O: 0-12 S: 0-1 Br: 0-1

Salem/Abdelrahman

T03261906 17 (0.611) Cm (16:24)

Sample #40

1: TOF MS ES+  
4.84e+004

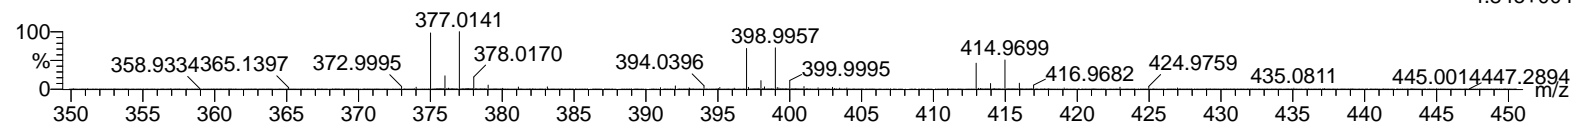

Minimum: -5.0  
Maximum: 5.0 15.0 100.0

| Mass     | Calc. Mass | mDa  | PPM   | DBE  | i-FIT | i-FIT (Norm) | Formula            |
|----------|------------|------|-------|------|-------|--------------|--------------------|
| 375.0154 | 375.0154   | 0.0  | 0.0   | 22.5 | 971.7 | 28.2         | C21 H3 N4 O4       |
| 375.0151 | 375.0151   | 0.3  | 0.8   | 2.5  | 959.2 | 15.6         | C8 H16 N4 O8 Br    |
| 375.0167 | 375.0167   | -1.3 | -3.5  | 10.5 | 943.5 | 0.0          | C17 H16 N2 O S Br  |
| 375.0141 | 375.0141   | 1.3  | 3.5   | 17.5 | 971.7 | 28.2         | C20 H7 O8          |
| 375.0138 | 375.0138   | 1.6  | 4.3   | -2.5 | 959.7 | 16.2         | C7 H20 O12 Br      |
| 375.0134 | 375.0134   | 2.0  | 5.3   | 8.5  | 963.4 | 19.8         | C12 H11 N2 O10 S   |
| 375.0175 | 375.0175   | -2.1 | -5.6  | 12.5 | 964.5 | 20.9         | C17 H11 O8 S       |
| 375.0133 | 375.0133   | 2.1  | 5.6   | 15.5 | 955.8 | 12.3         | C20 H12 N2 O Br    |
| 375.0126 | 375.0126   | 2.8  | 7.5   | 6.5  | 951.2 | 7.7          | C12 H16 N4 O3 S Br |
| 375.0185 | 375.0185   | -3.1 | -8.3  | -2.5 | 955.9 | 12.4         | C5 H20 N4 O8 S Br  |
| 375.0188 | 375.0188   | -3.4 | -9.1  | 17.5 | 964.3 | 20.7         | C18 H7 N4 O4 S     |
| 375.0192 | 375.0192   | -3.8 | -10.1 | 6.5  | 957.6 | 14.1         | C13 H16 N2 O6 Br   |
| 375.0116 | 375.0116   | 3.8  | 10.1  | 21.5 | 965.4 | 21.8         | C24 H7 O3 S        |
| 375.0113 | 375.0113   | 4.1  | 10.9  | 1.5  | 953.1 | 9.6          | C11 H20 O7 S Br    |
| 375.0195 | 375.0195   | -4.1 | -10.9 | 26.5 | 972.3 | 28.8         | C26 H3 N2 O2       |

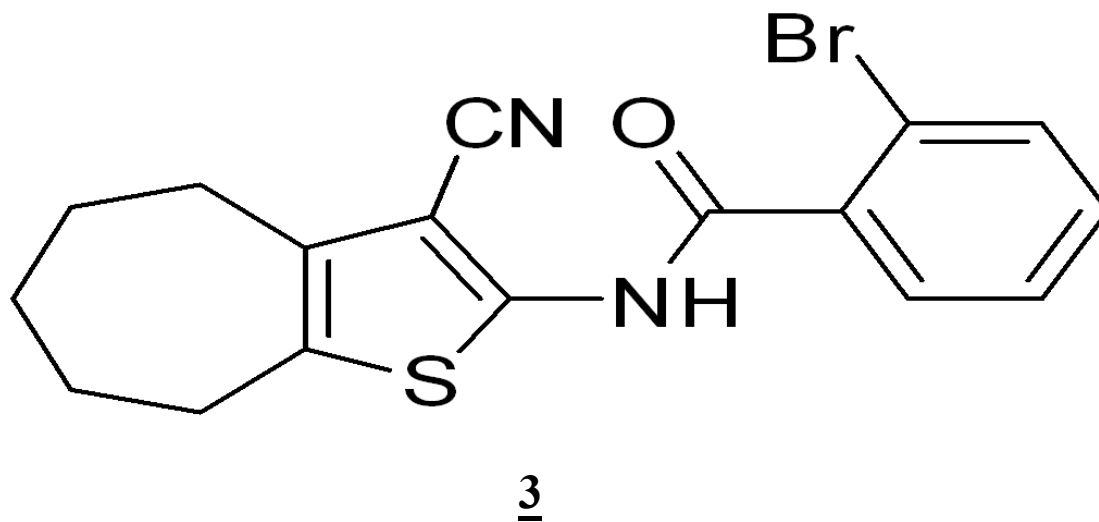

Figure S-2. HRMS of compound 3

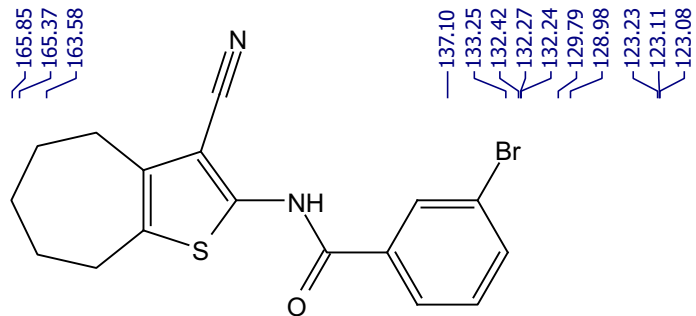

**4**

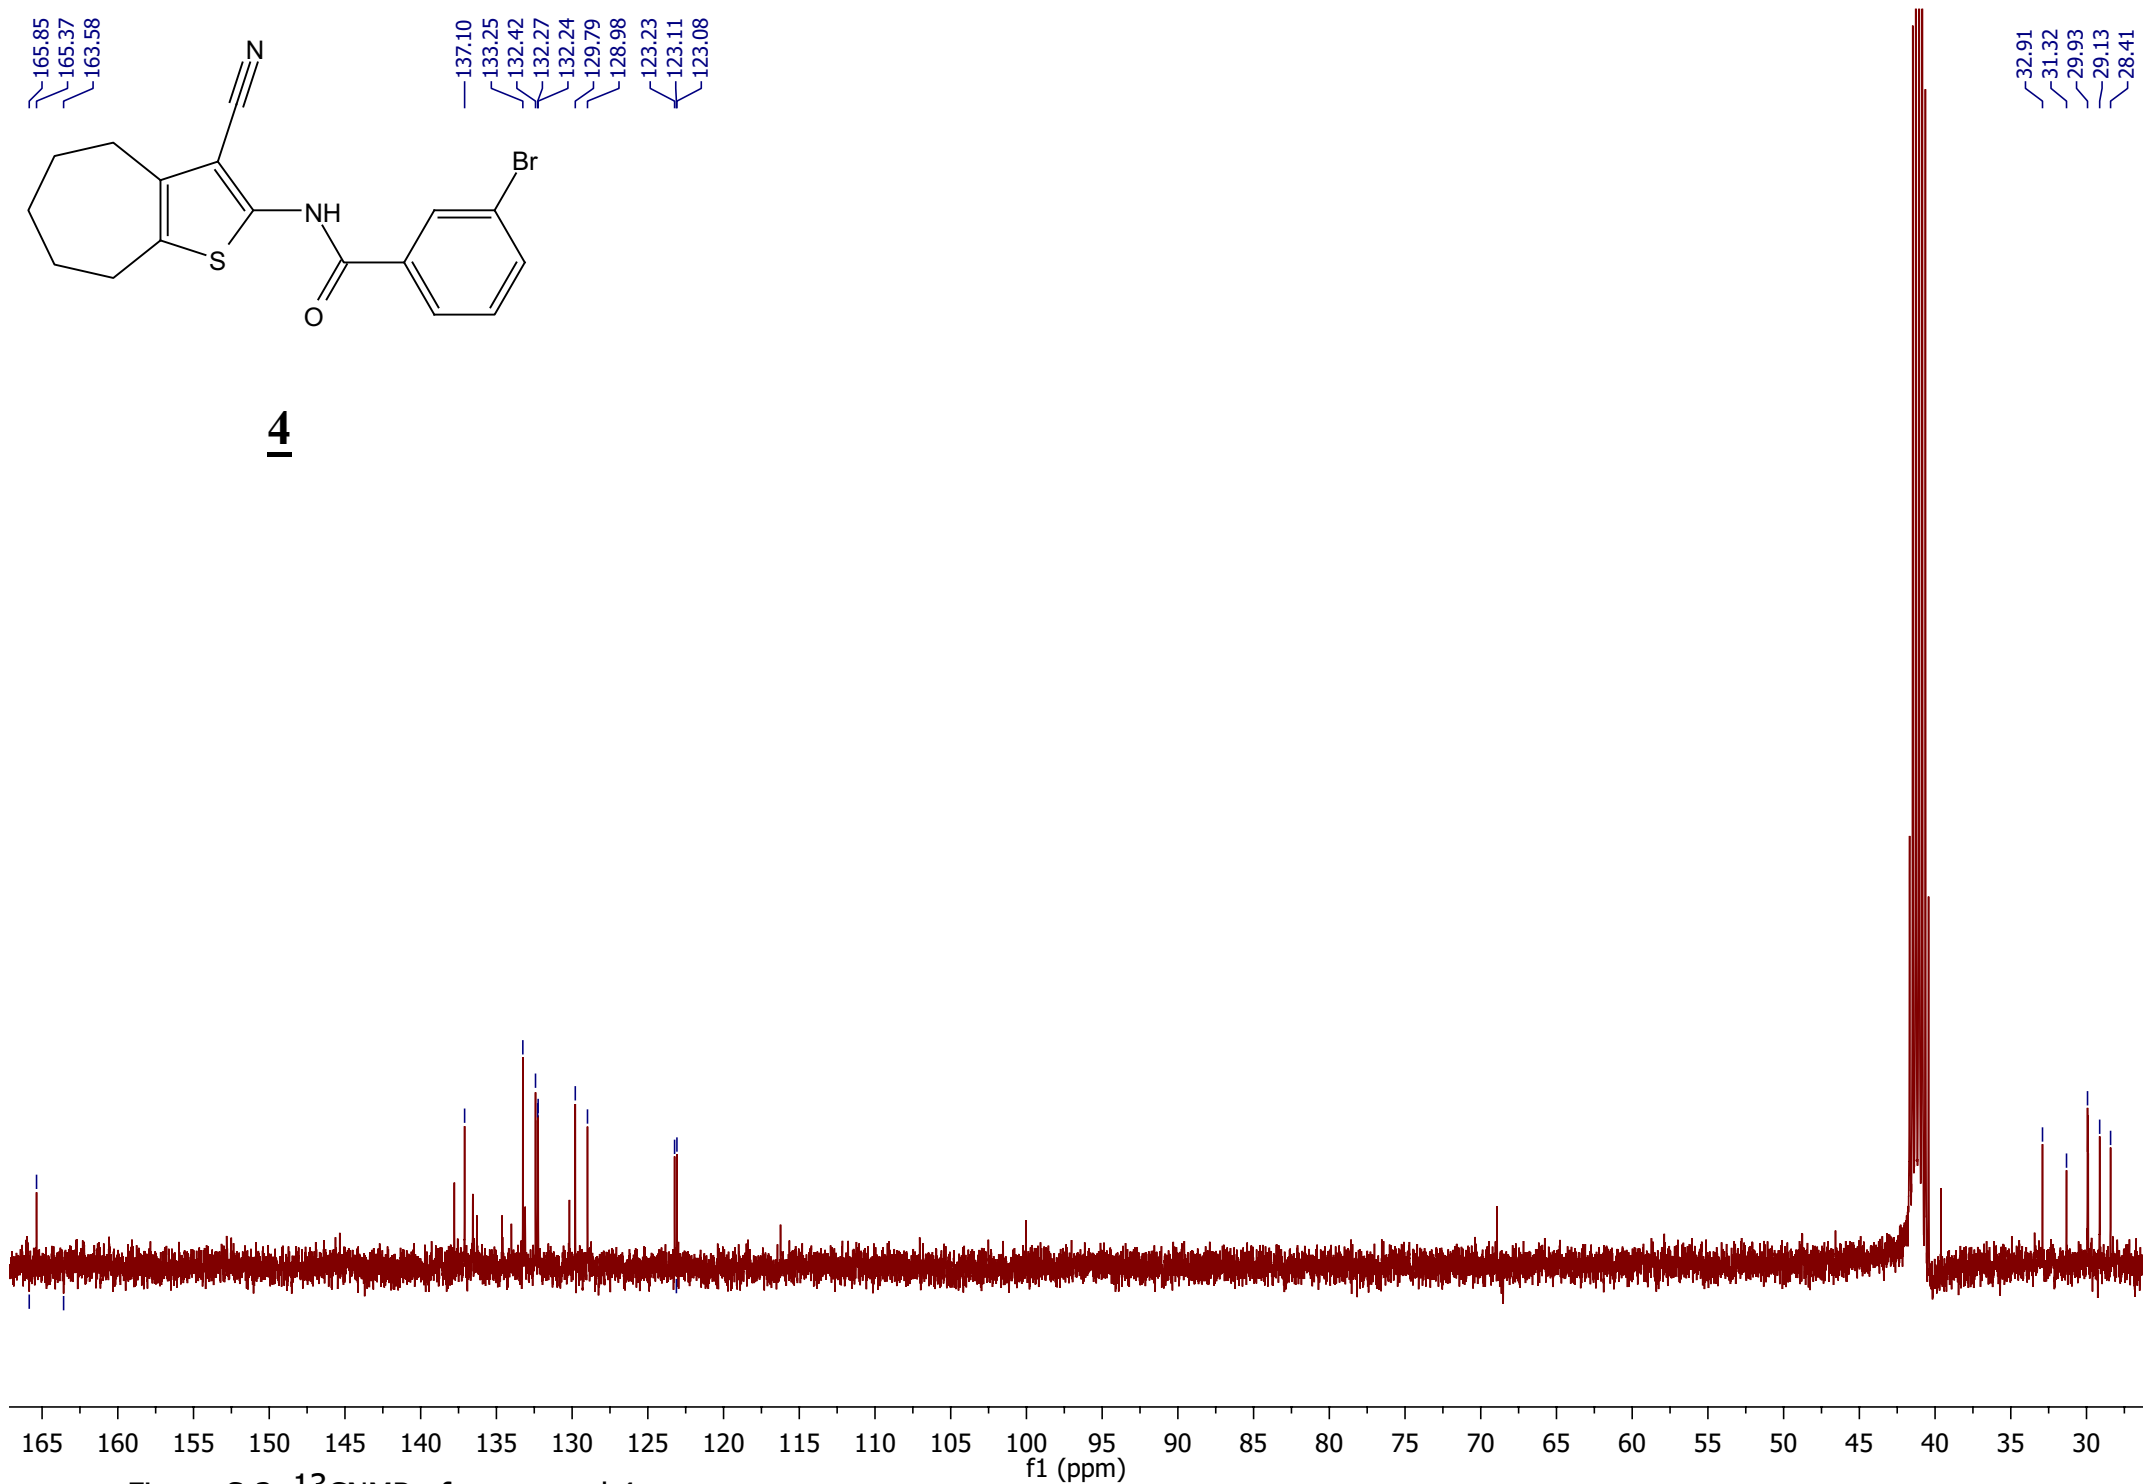

Figure S-3. <sup>13</sup>CNMR of compound 4

# Elemental Composition Report

## Single Mass Analysis

Tolerance = 5.0 mDa / DBE: min = -5.0, max = 100.0

Element prediction: Off

Number of isotope peaks used for i-FIT = 5

Monoisotopic Mass, Even Electron Ions

1158 formula(e) evaluated with 15 results (up to 1000) for each mass

Elements Used:

C: 1-100 H: 1-200 N: 0-5 O: 0-12 S: 0-1 Br: 0-1

Salem/Abdelrahman  
T03261914 9 (0.322) Cm (4:13)

Sample #41

1: TOF MS ES-  
4.21e+004

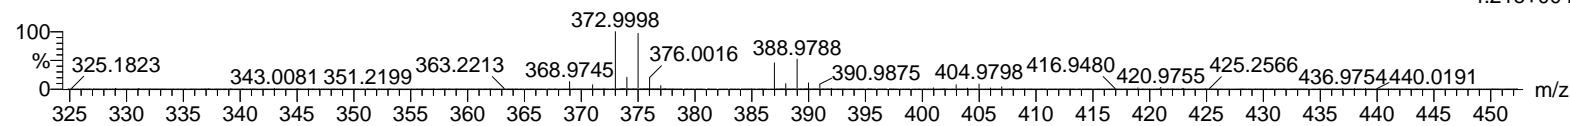

Minimum: -5.0  
Maximum: 5.0 15.0 100.0

| Mass            | Calc. Mass | mDa  | PPM   | DBE  | i-FIT | i-FIT (Norm) | Formula                  |
|-----------------|------------|------|-------|------|-------|--------------|--------------------------|
| <b>372.9998</b> | 372.9998   | 0.0  | 0.0   | 23.5 | 928.9 | 33.7         | C21 H N4 O4              |
| 372.9995        | 372.9995   | 0.3  | 0.8   | 3.5  | 916.0 | 20.8         | C8 H14 N4 O8 Br          |
| <b>373.0010</b> | 373.0010   | -1.2 | -3.2  | 11.5 | 895.2 | 0.0          | <b>C17 H14 N2 O S Br</b> |
| 372.9984        | 372.9984   | 1.4  | 3.8   | 18.5 | 928.9 | 33.7         | C20 H5 O8                |
| 372.9982        | 372.9982   | 1.6  | 4.3   | -1.5 | 916.4 | 21.2         | C7 H18 O12 Br            |
| 373.0018        | 373.0018   | -2.0 | -5.4  | 13.5 | 922.4 | 27.2         | C17 H9 O8 S              |
| 372.9978        | 372.9978   | 2.0  | 5.4   | 9.5  | 921.6 | 26.5         | C12 H9 N2 O10 S          |
| 372.9976        | 372.9976   | 2.2  | 5.9   | 16.5 | 912.9 | 17.7         | C20 H10 N2 O Br          |
| 372.9970        | 372.9970   | 2.8  | 7.5   | 7.5  | 905.0 | 9.8          | C12 H14 N4 O3 S Br       |
| 373.0029        | 373.0029   | -3.1 | -8.3  | -1.5 | 911.7 | 16.6         | C5 H18 N4 O8 S Br        |
| 373.0032        | 373.0032   | -3.4 | -9.1  | 18.5 | 922.3 | 27.1         | C18 H5 N4 O4 S           |
| 373.0035        | 373.0035   | -3.7 | -9.9  | 7.5  | 913.8 | 18.6         | C13 H14 N2 O6 Br         |
| 372.9959        | 372.9959   | 3.9  | 10.5  | 22.5 | 923.3 | 28.1         | C24 H5 O3 S              |
| 373.0038        | 373.0038   | -4.0 | -10.7 | 27.5 | 929.5 | 34.3         | C26 H N2 O2              |
| 372.9957        | 372.9957   | 4.1  | 11.0  | 2.5  | 906.1 | 11.0         | C11 H18 O7 S Br          |

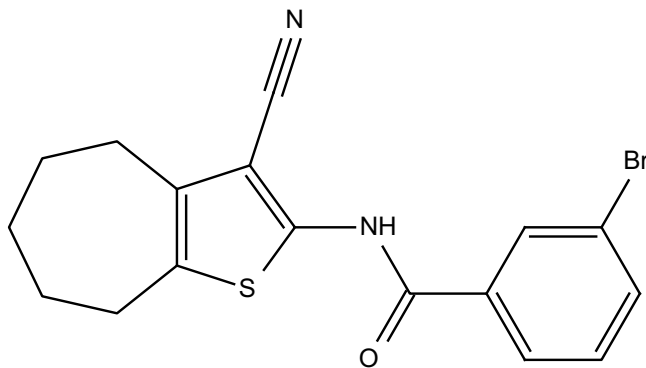

**4**

Figure S-4. HRMS of compound 4

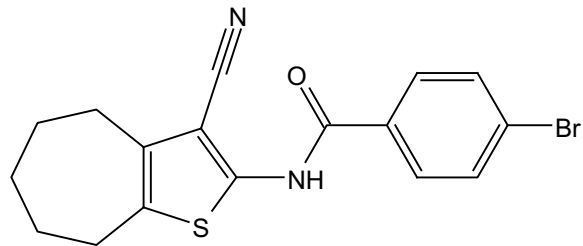

5

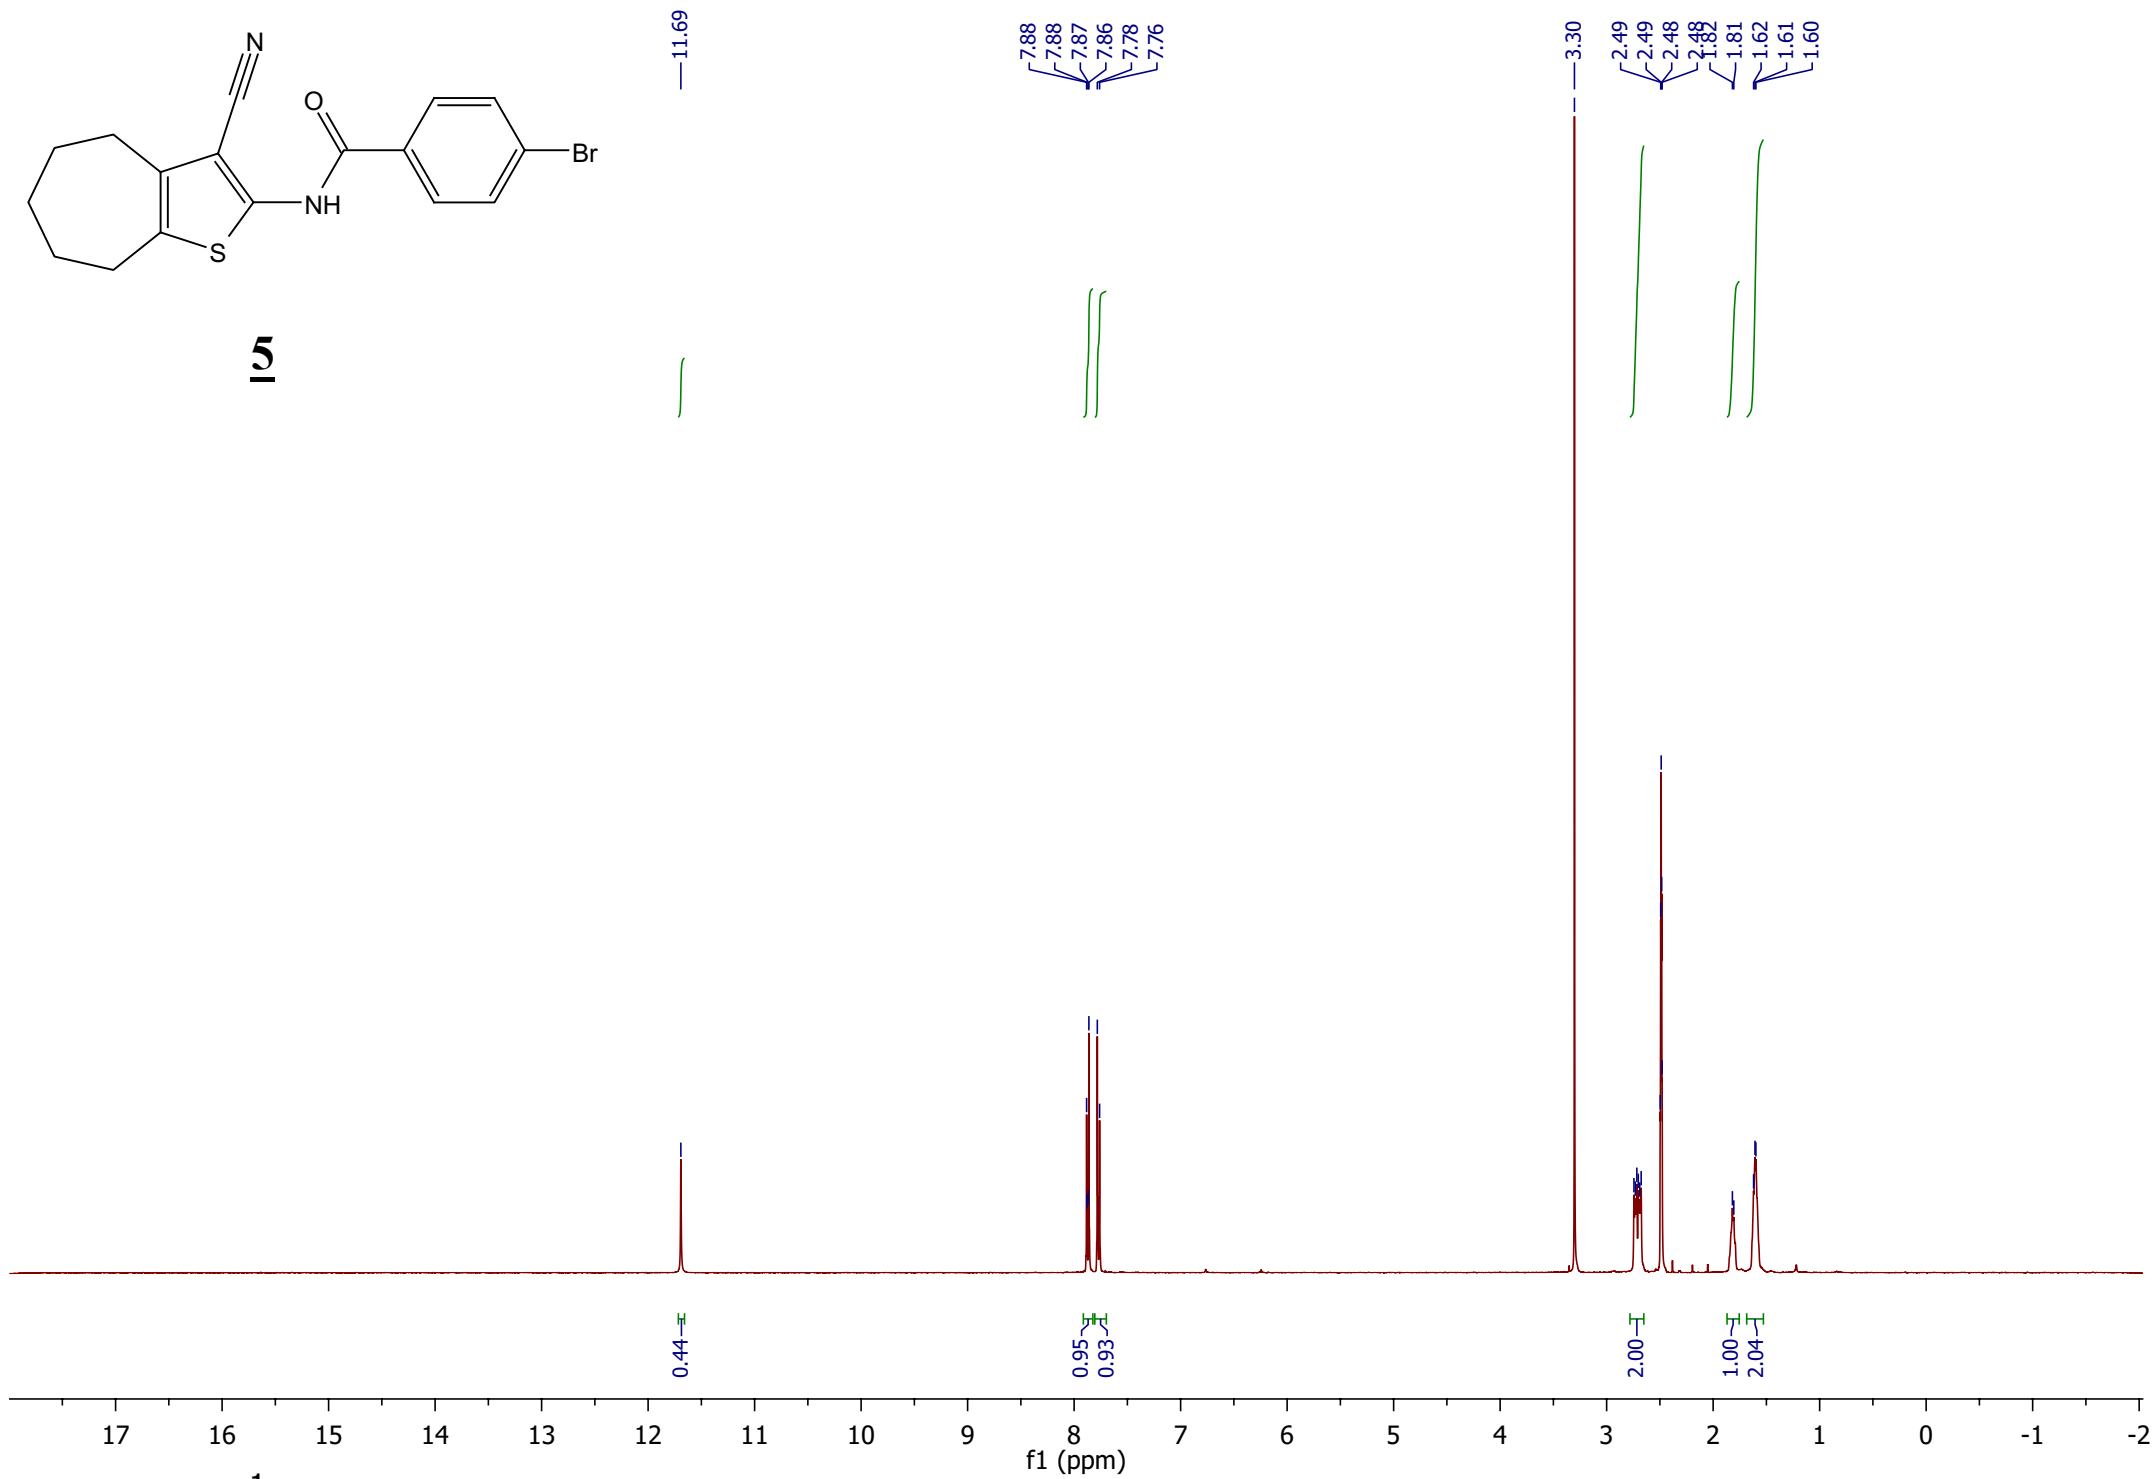

Figure S-5. <sup>1</sup>H NMR of compound 5



# Elemental Composition Report

## Single Mass Analysis

Tolerance = 5.0 mDa / DBE: min = -5.0, max = 100.0

Element prediction: Off

Number of isotope peaks used for i-FIT = 5

Monoisotopic Mass, Even Electron Ions

1158 formula(e) evaluated with 15 results within limits (all results (up to 1000) for each mass)

Elements Used:

C: 1-100 H: 1-200 N: 0-5 O: 0-12 S: 0-1 Br: 0-1

Salem/Abdelrahman  
T03261912 23 (0.803) Cm (5:26)

Sample #42

1: TOF MS ES-  
4.62e+004

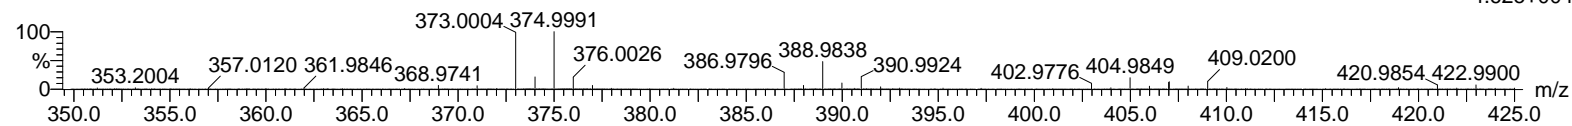

Minimum: -5.0  
Maximum: 5.0 15.0 100.0

| Mass            | Calc. Mass      | mDa  | PPM  | DBE  | i-FIT  | i-FIT (Norm) | Formula                  |
|-----------------|-----------------|------|------|------|--------|--------------|--------------------------|
| <b>373.0004</b> | <b>373.0010</b> | -0.6 | -1.6 | 11.5 | 990.8  | 0.0          | <b>C17 H14 N2 O S Br</b> |
| 372.9998        |                 | 0.6  | 1.6  | 23.5 | 1027.4 | 36.7         | C21 H N4 O4              |
| 372.9995        |                 | 0.9  | 2.4  | 3.5  | 1015.5 | 24.7         | C8 H14 N4 O8 Br          |
| 373.0018        |                 | -1.4 | -3.8 | 13.5 | 1021.7 | 31.0         | C17 H9 O8 S              |
| 372.9984        |                 | 2.0  | 5.4  | 18.5 | 1027.4 | 36.6         | C20 H5 O8                |
| 372.9982        |                 | 2.2  | 5.9  | -1.5 | 1016.0 | 25.2         | C7 H18 O12 Br            |
| 373.0029        |                 | -2.5 | -6.7 | -1.5 | 1010.1 | 19.3         | C5 H18 N4 O8 S Br        |
| 372.9978        |                 | 2.6  | 7.0  | 9.5  | 1021.2 | 30.4         | C12 H9 N2 O10 S          |
| 373.0032        |                 | -2.8 | -7.5 | 18.5 | 1021.6 | 30.8         | C18 H5 N4 O4 S           |
| 372.9976        |                 | 2.8  | 7.5  | 16.5 | 1011.9 | 21.1         | C20 H10 N2 O Br          |
| 373.0035        |                 | -3.1 | -8.3 | 7.5  | 1013.2 | 22.5         | C13 H14 N2 O6 Br         |
| 373.0038        |                 | -3.4 | -9.1 | 27.5 | 1028.0 | 37.2         | C26 H N2 O2              |
| 372.9970        |                 | 3.4  | 9.1  | 7.5  | 1003.4 | 12.6         | C12 H14 N4 O3 S Br       |
| 372.9959        |                 | 4.5  | 12.1 | 22.5 | 1022.5 | 31.7         | C24 H5 O3 S              |
| 372.9957        |                 | 4.7  | 12.6 | 2.5  | 1004.9 | 14.2         | C11 H18 O7 S Br          |

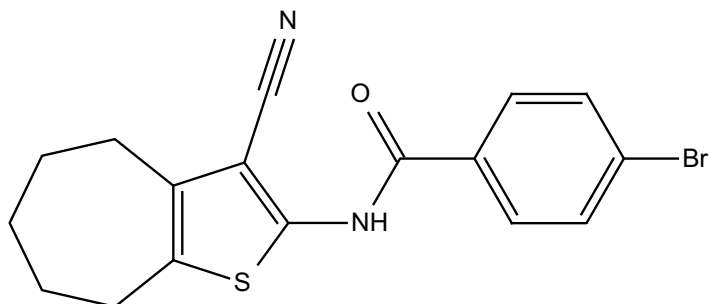

**5**

Figure S-6. HRMS of compound 5

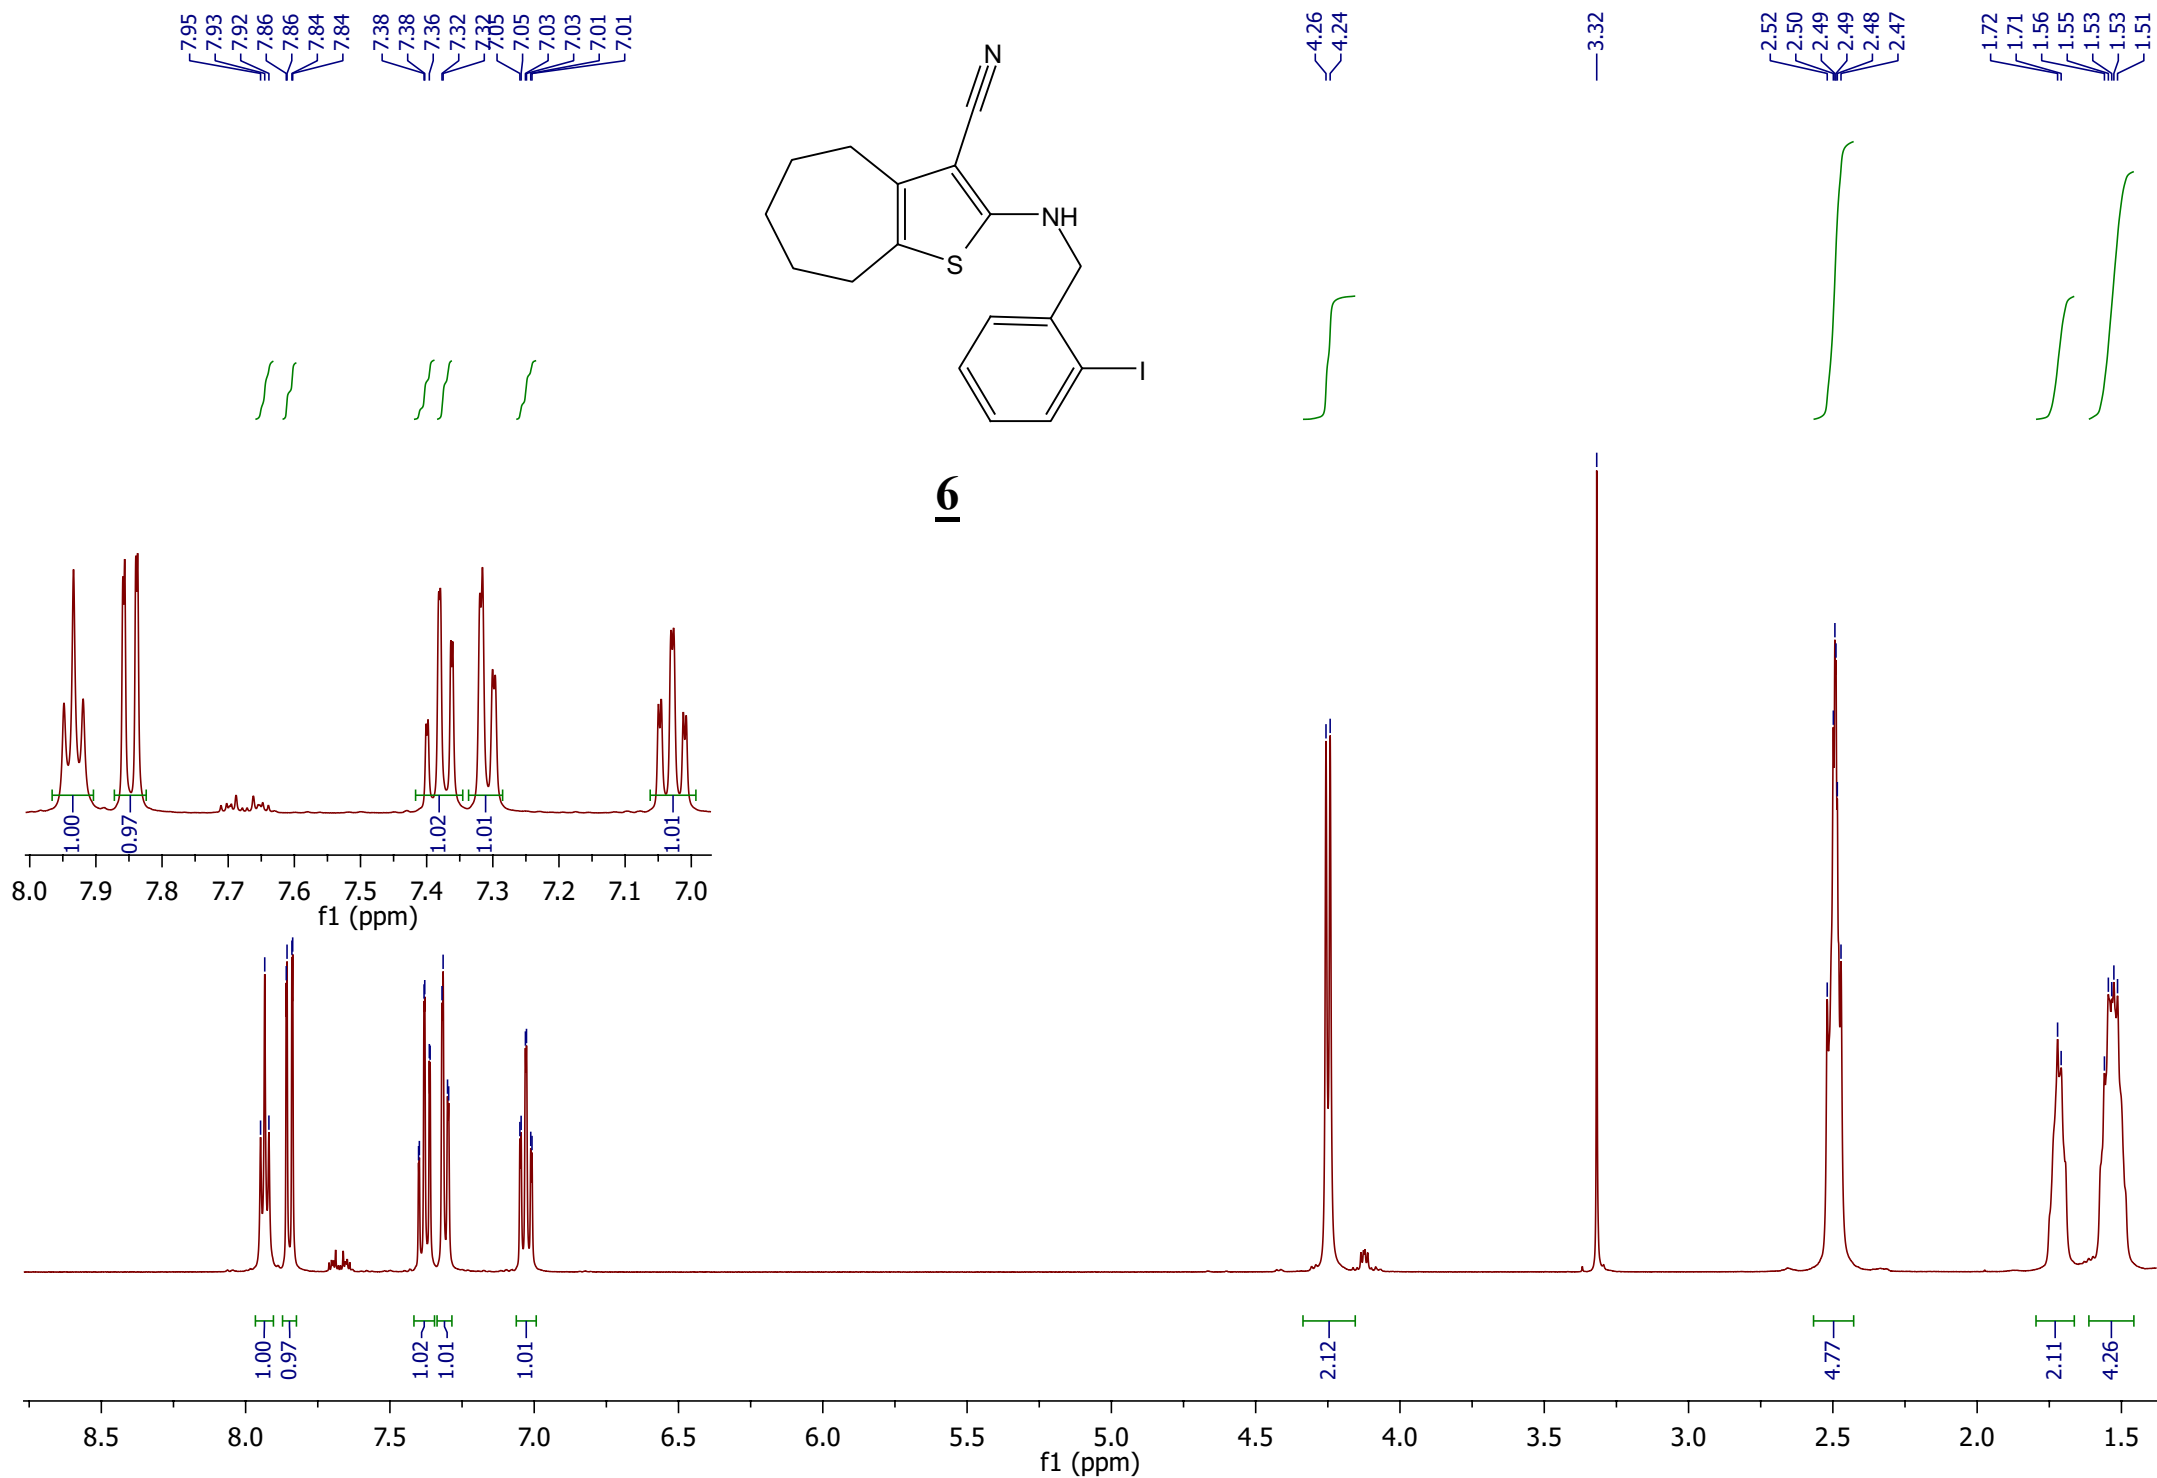

Figure S-7. <sup>1</sup>H NMR of compound 6

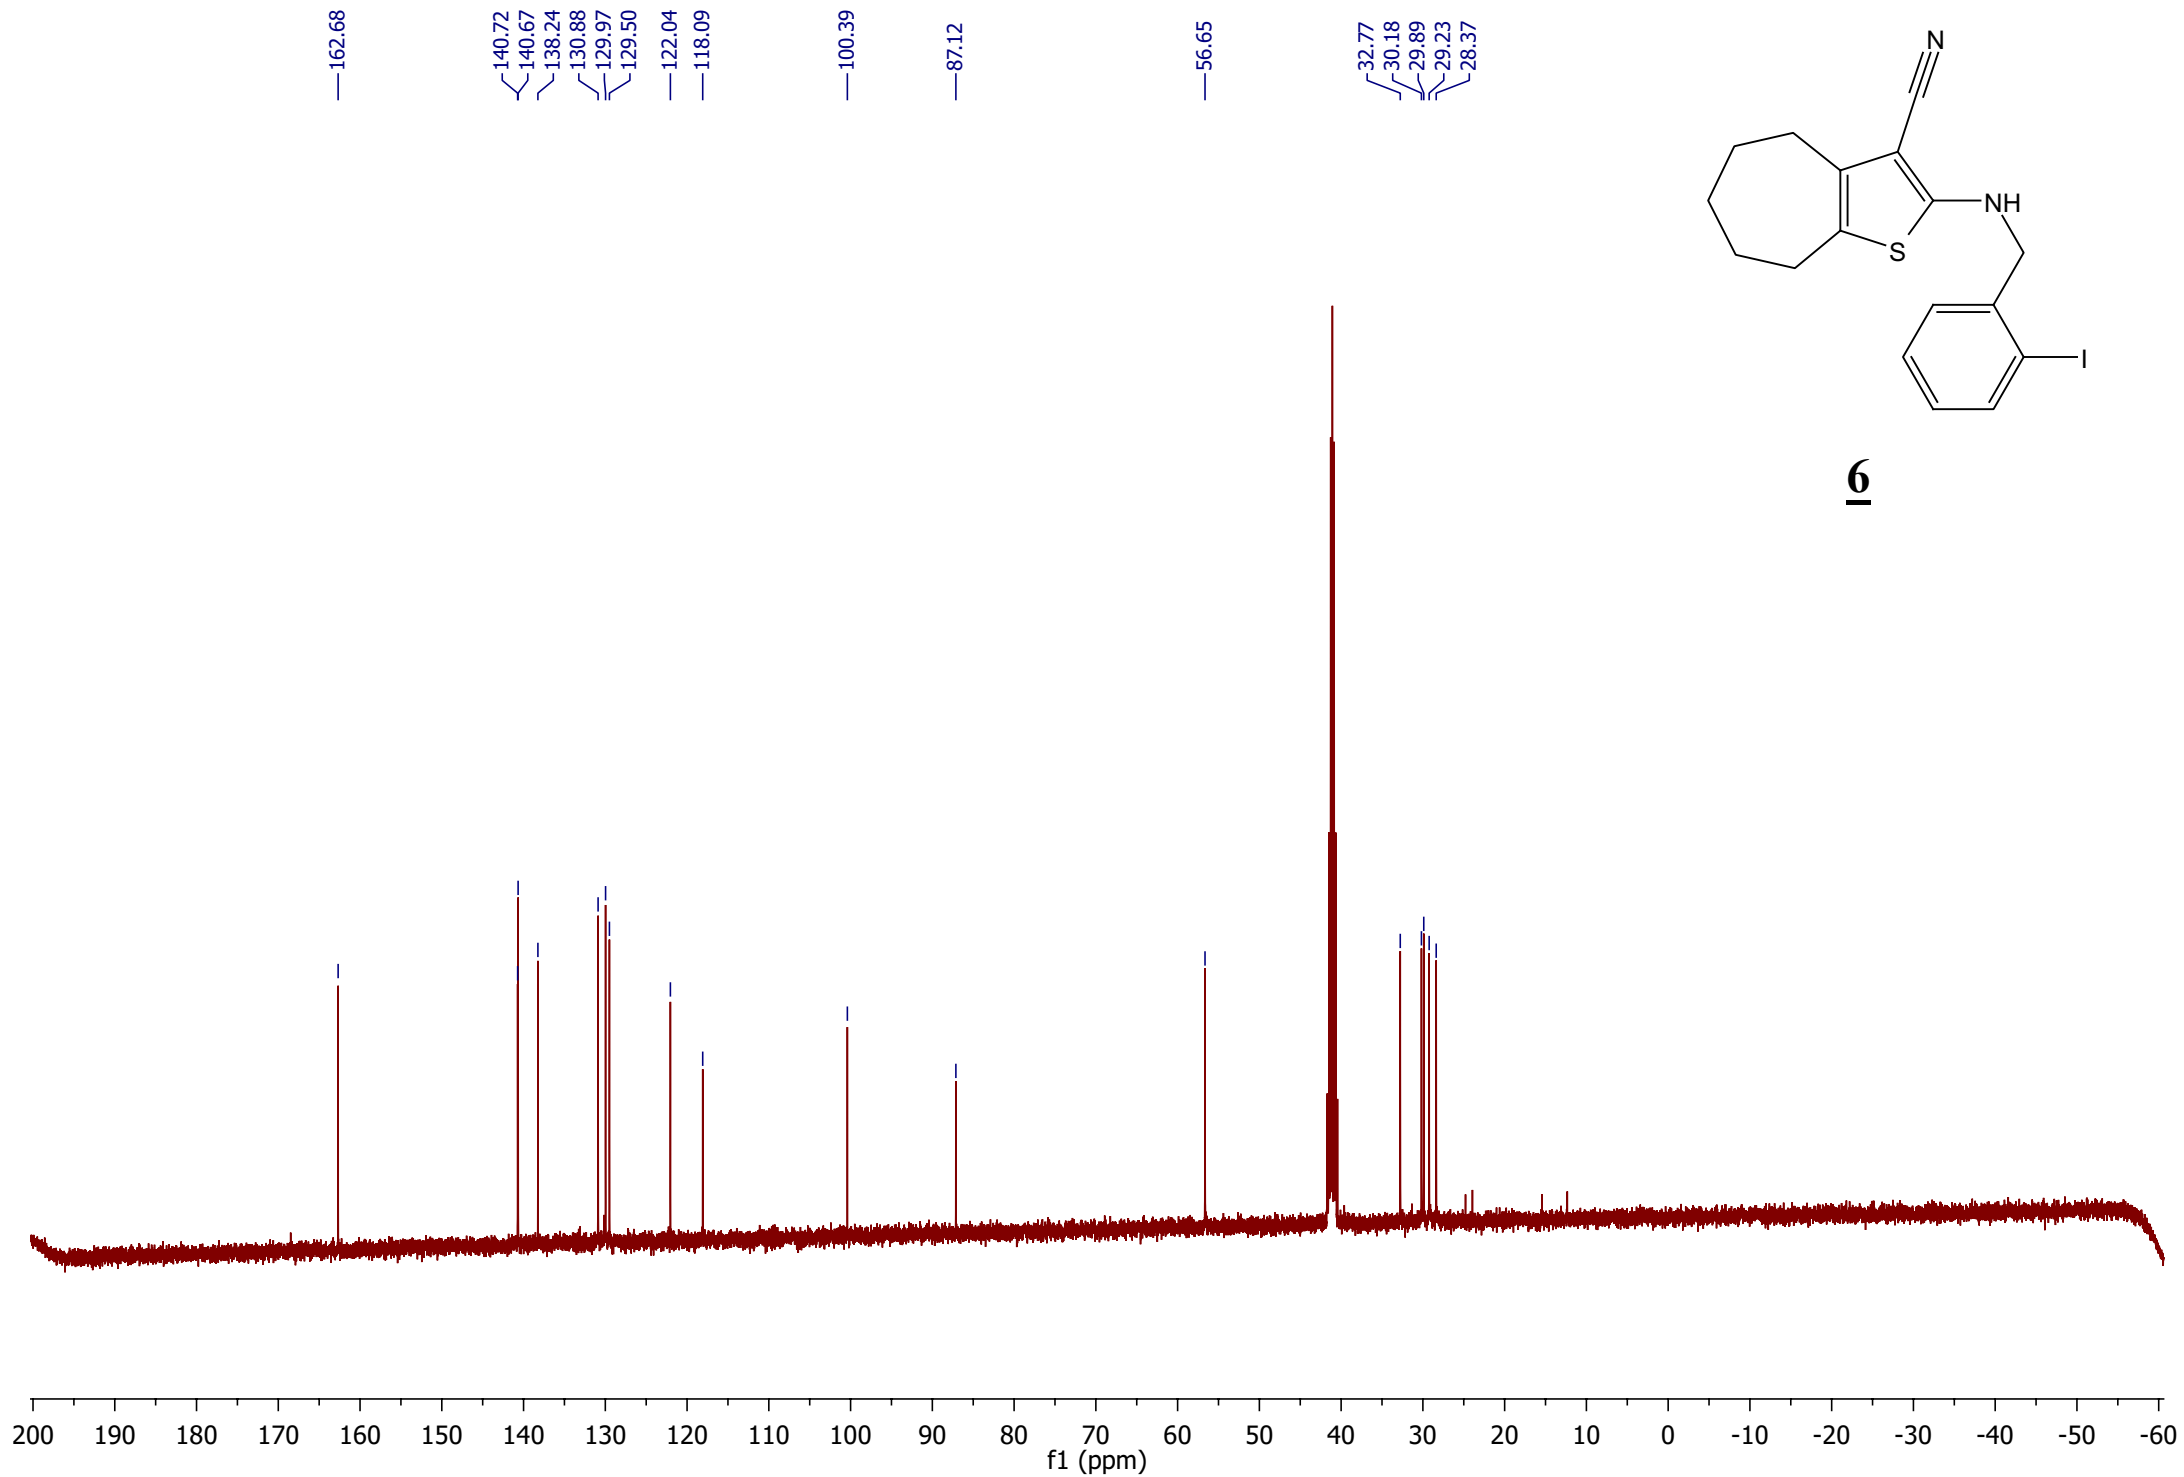

Figure S-8. <sup>13</sup>CNMR of compound 6

# Elemental Composition Report

## Single Mass Analysis

Tolerance = 5.0 mDa / DBE: min = -5.0, max = 100.0

Element prediction: Off

Number of isotope peaks used for i-FIT = 5

Monoisotopic Mass, Even Electron Ions

221 formula(e) evaluated with 4 results within limits (all results (up to 1000) for each mass)

Elements Used:

C: 1-100 H: 1-200 N: 0-6 O: 0-10 S: 1-1 I: 1-1

Salem/Abdelrahman  
T01281947a 12 (0.433) Cm (6:23)

Sample #12

1: TOF MS ES+  
9.47e+004

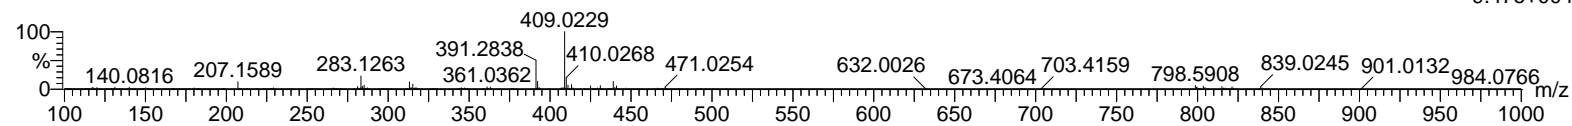

Minimum: -5.0  
Maximum: 5.0 15.0 100.0

| Mass     | Calc. Mass | mDa  | PPM  | DBE  | i-FIT | i-FIT (Norm) | Formula           |
|----------|------------|------|------|------|-------|--------------|-------------------|
| 409.0230 | 409.0235   | -0.5 | -1.2 | 9.5  | 844.0 | 0.0          | C17 H18 N2 S I    |
|          | 409.0254   | -2.4 | -5.9 | -3.5 | 856.6 | 12.6         | C5 H22 N4 O7 S I  |
|          | 409.0195   | 3.5  | 8.6  | 5.5  | 851.3 | 7.2          | C12 H18 N4 O2 S I |
|          | 409.0182   | 4.8  | 11.7 | 0.5  | 852.4 | 8.3          | C11 H22 O6 S I    |

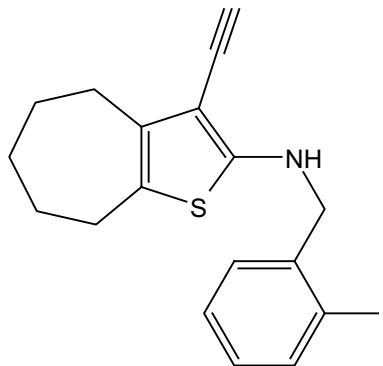

**6**

Figure S-9. HRMS of compound 6

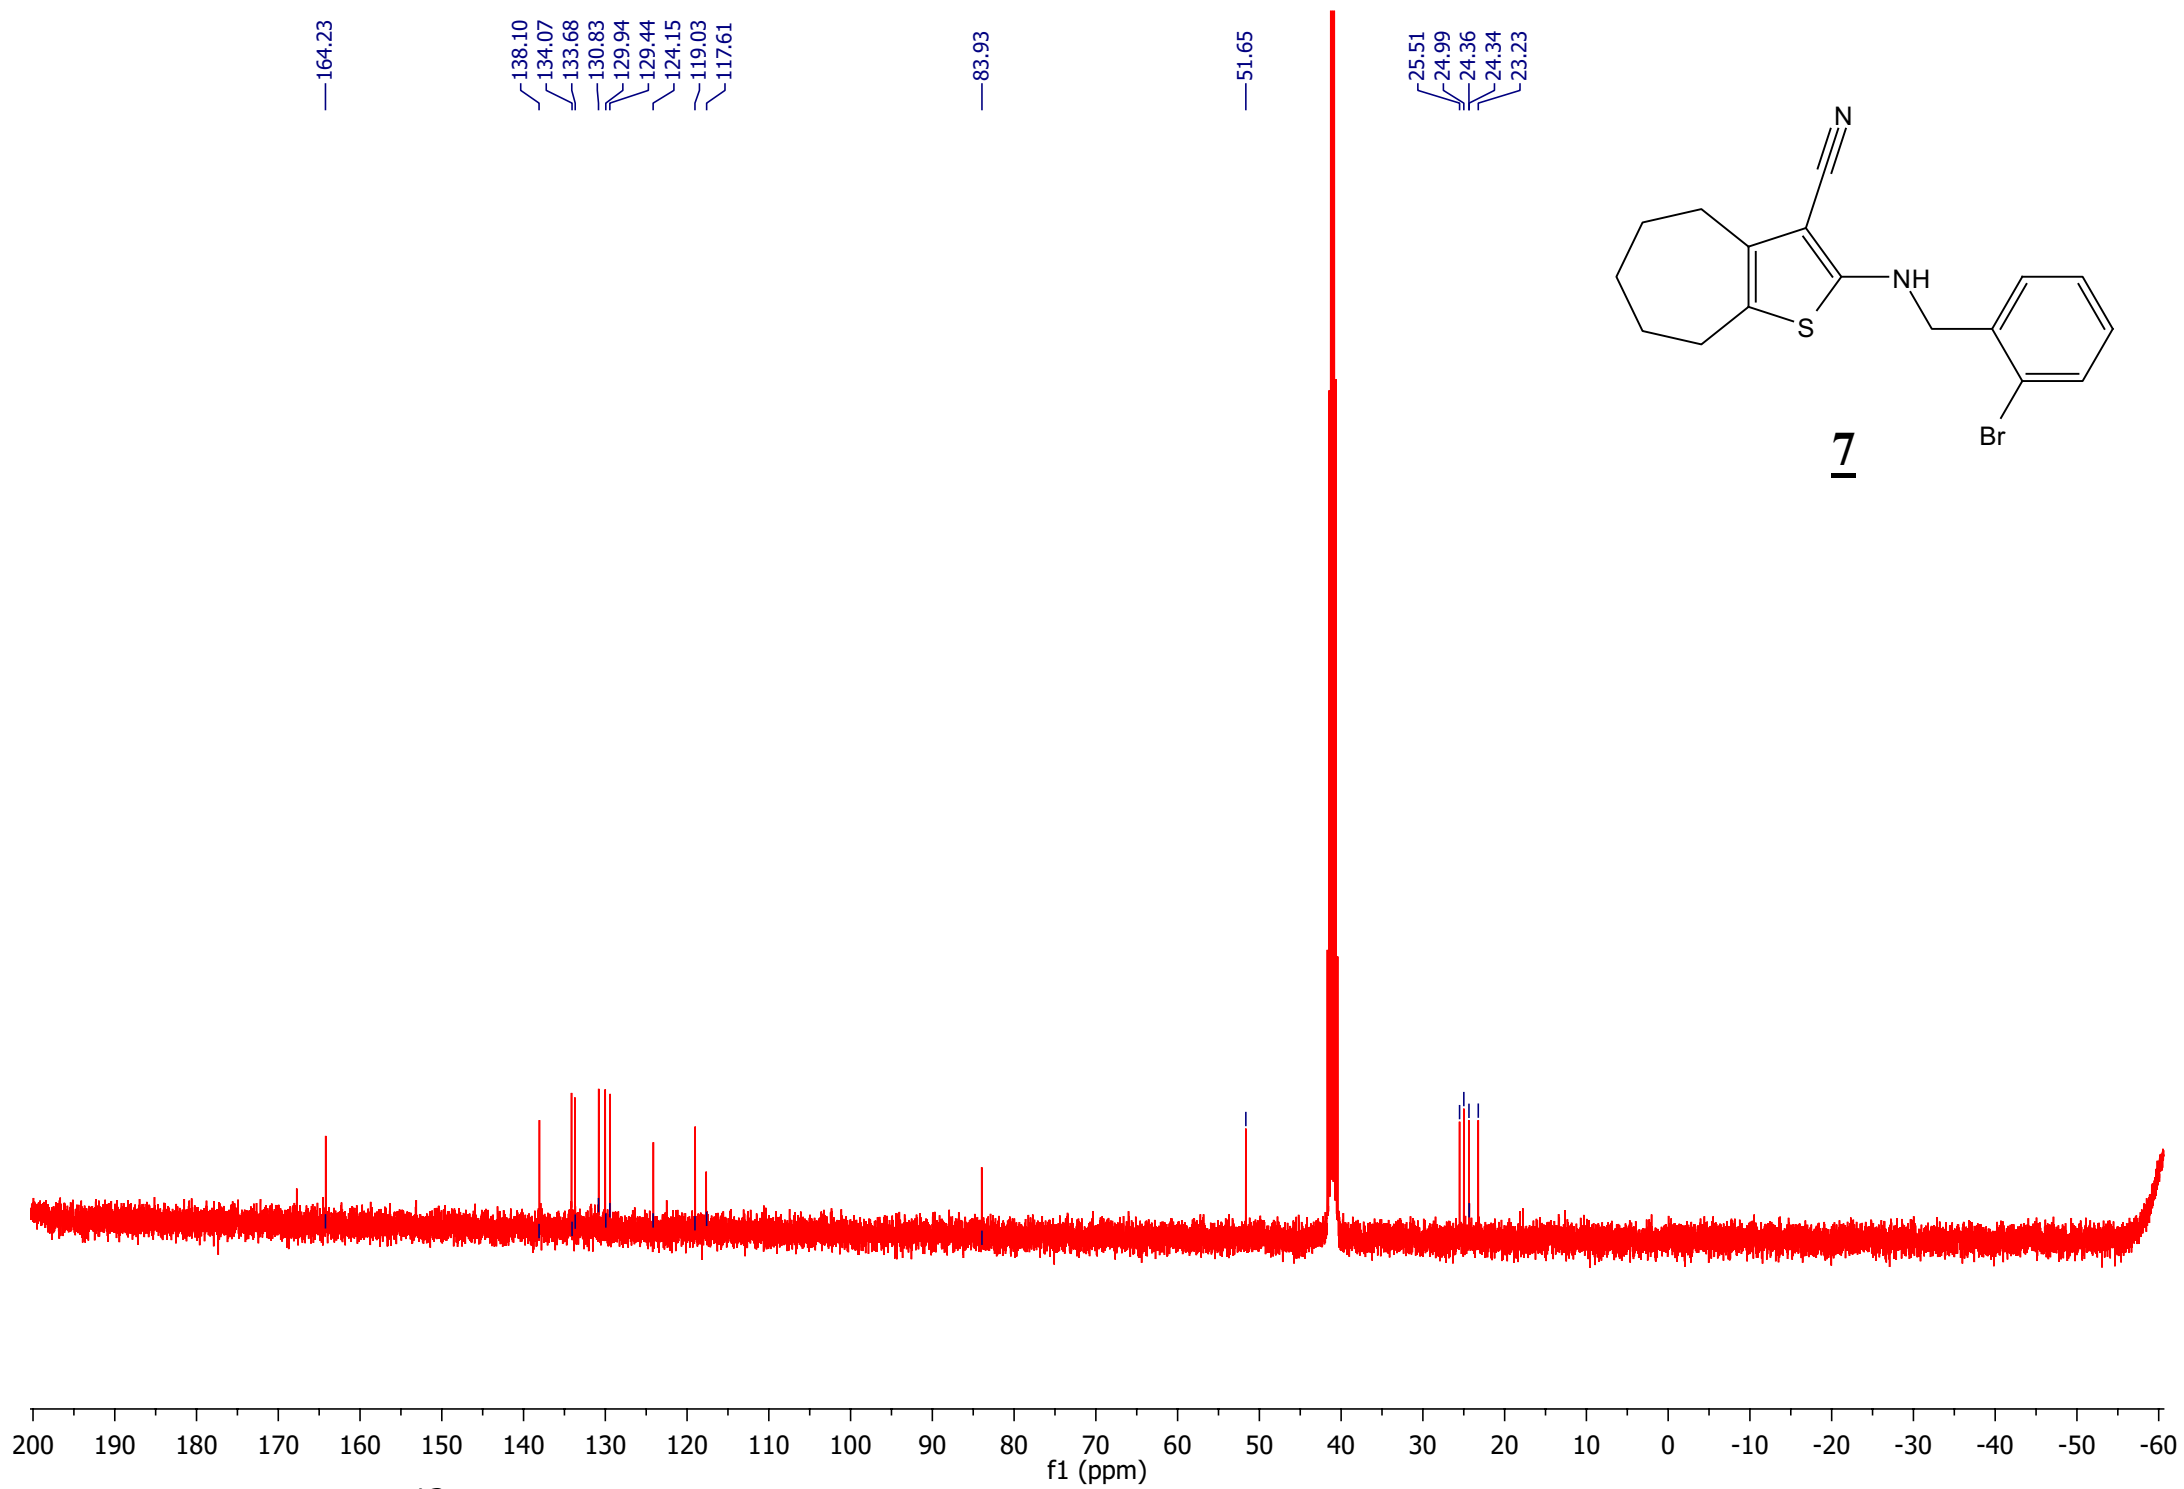

Figure S-10.  $^{13}\text{C}$ NMR of compound 7

# Elemental Composition Report

## Single Mass Analysis

Tolerance = 5.0 mDa / DBE: min = -5.0, max = 100.0

Element prediction: Off

Number of isotope peaks used for i-FIT = 5

Monoisotopic Mass, Even Electron Ions

539 formula(e) evaluated with 9 results within limits (all results (up to 1000) for each mass)

Elements Used:

C: 1-100 H: 1-200 N: 0-6 O: 0-10 S: 1-1 Br: 0-1

Salem/Abdelrahman

T01281939 5 (0.178) Cm (4:10)

Sample #10

1: TOF MS ES+  
6.27e+003

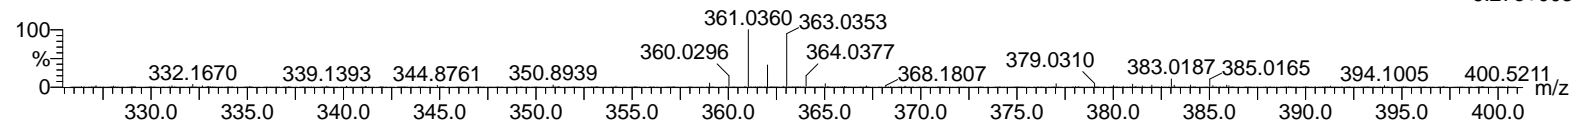

Minimum: -5.0  
Maximum: 5.0 15.0 100.0

| Mass     | Calc. Mass | mDa  | PPM  | DBE  | i-FIT | i-FIT (Norm) | Formula            |
|----------|------------|------|------|------|-------|--------------|--------------------|
| 361.0361 | 361.0355   | 0.6  | 1.7  | 12.5 | 544.8 | 7.4          | C13 H9 N6 O5 S     |
|          | 361.0374   | -1.3 | -3.6 | 9.5  | 537.8 | 0.4          | C17 H18 N2 S Br    |
|          | 361.0342   | 1.9  | 5.3  | 7.5  | 544.9 | 7.5          | C12 H13 N2 O9 S    |
|          | 361.0382   | -2.1 | -5.8 | 11.5 | 545.0 | 7.6          | C17 H13 O7 S       |
|          | 361.0334   | 2.7  | 7.5  | 5.5  | 538.9 | 1.5          | C12 H18 N4 O2 S Br |
|          | 361.0393   | -3.2 | -8.9 | -3.5 | 540.8 | 3.4          | C5 H22 N4 O7 S Br  |
|          | 361.0395   | -3.4 | -9.4 | 16.5 | 544.9 | 7.5          | C18 H9 N4 O3 S     |
|          | 361.0323   | 3.8  | 10.5 | 20.5 | 544.7 | 7.2          | C24 H9 O2 S        |
|          | 361.0320   | 4.1  | 11.4 | 0.5  | 540.0 | 2.6          | C11 H22 O6 S Br    |

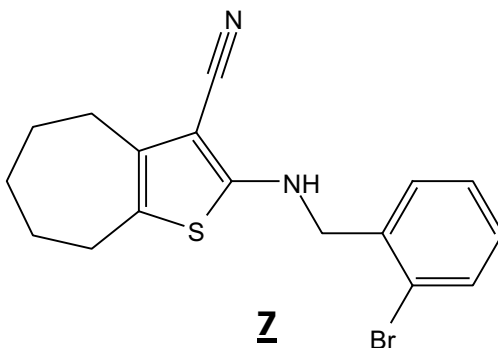

Figure S-11. HRMS of compound 7

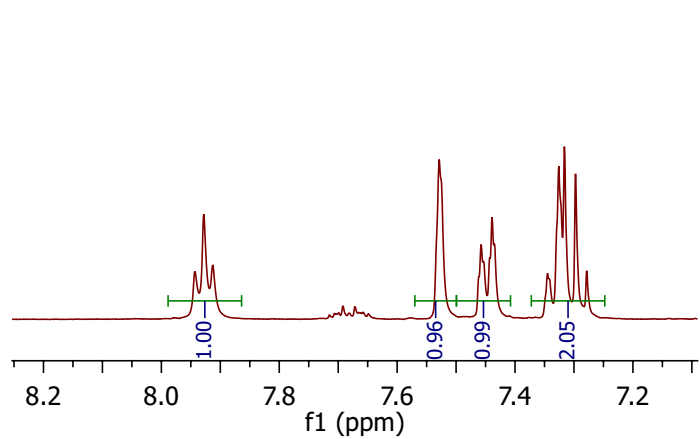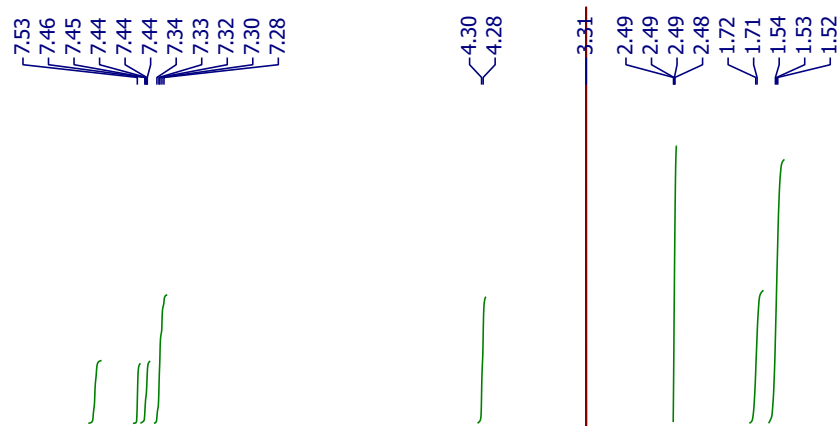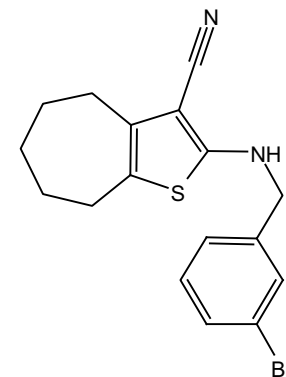

**8**

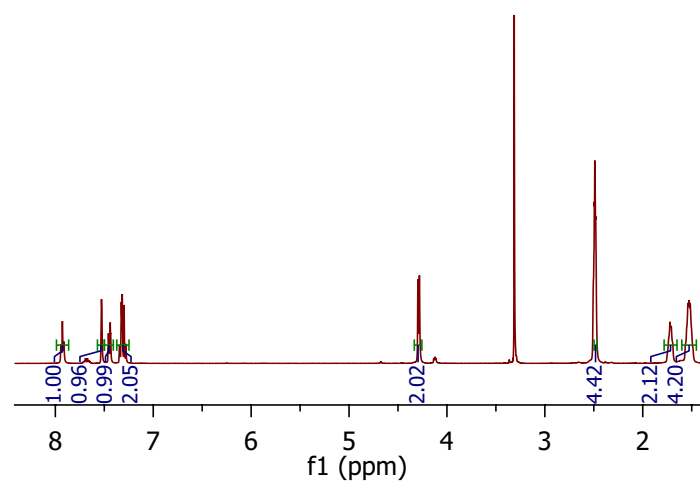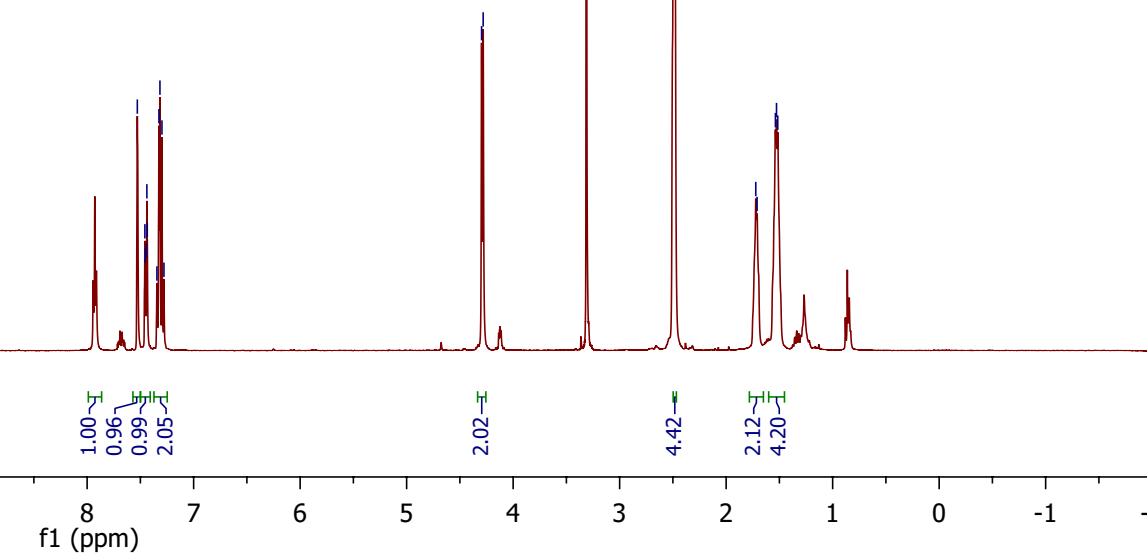

Figure S-12. <sup>1</sup>H NMR of compound 8

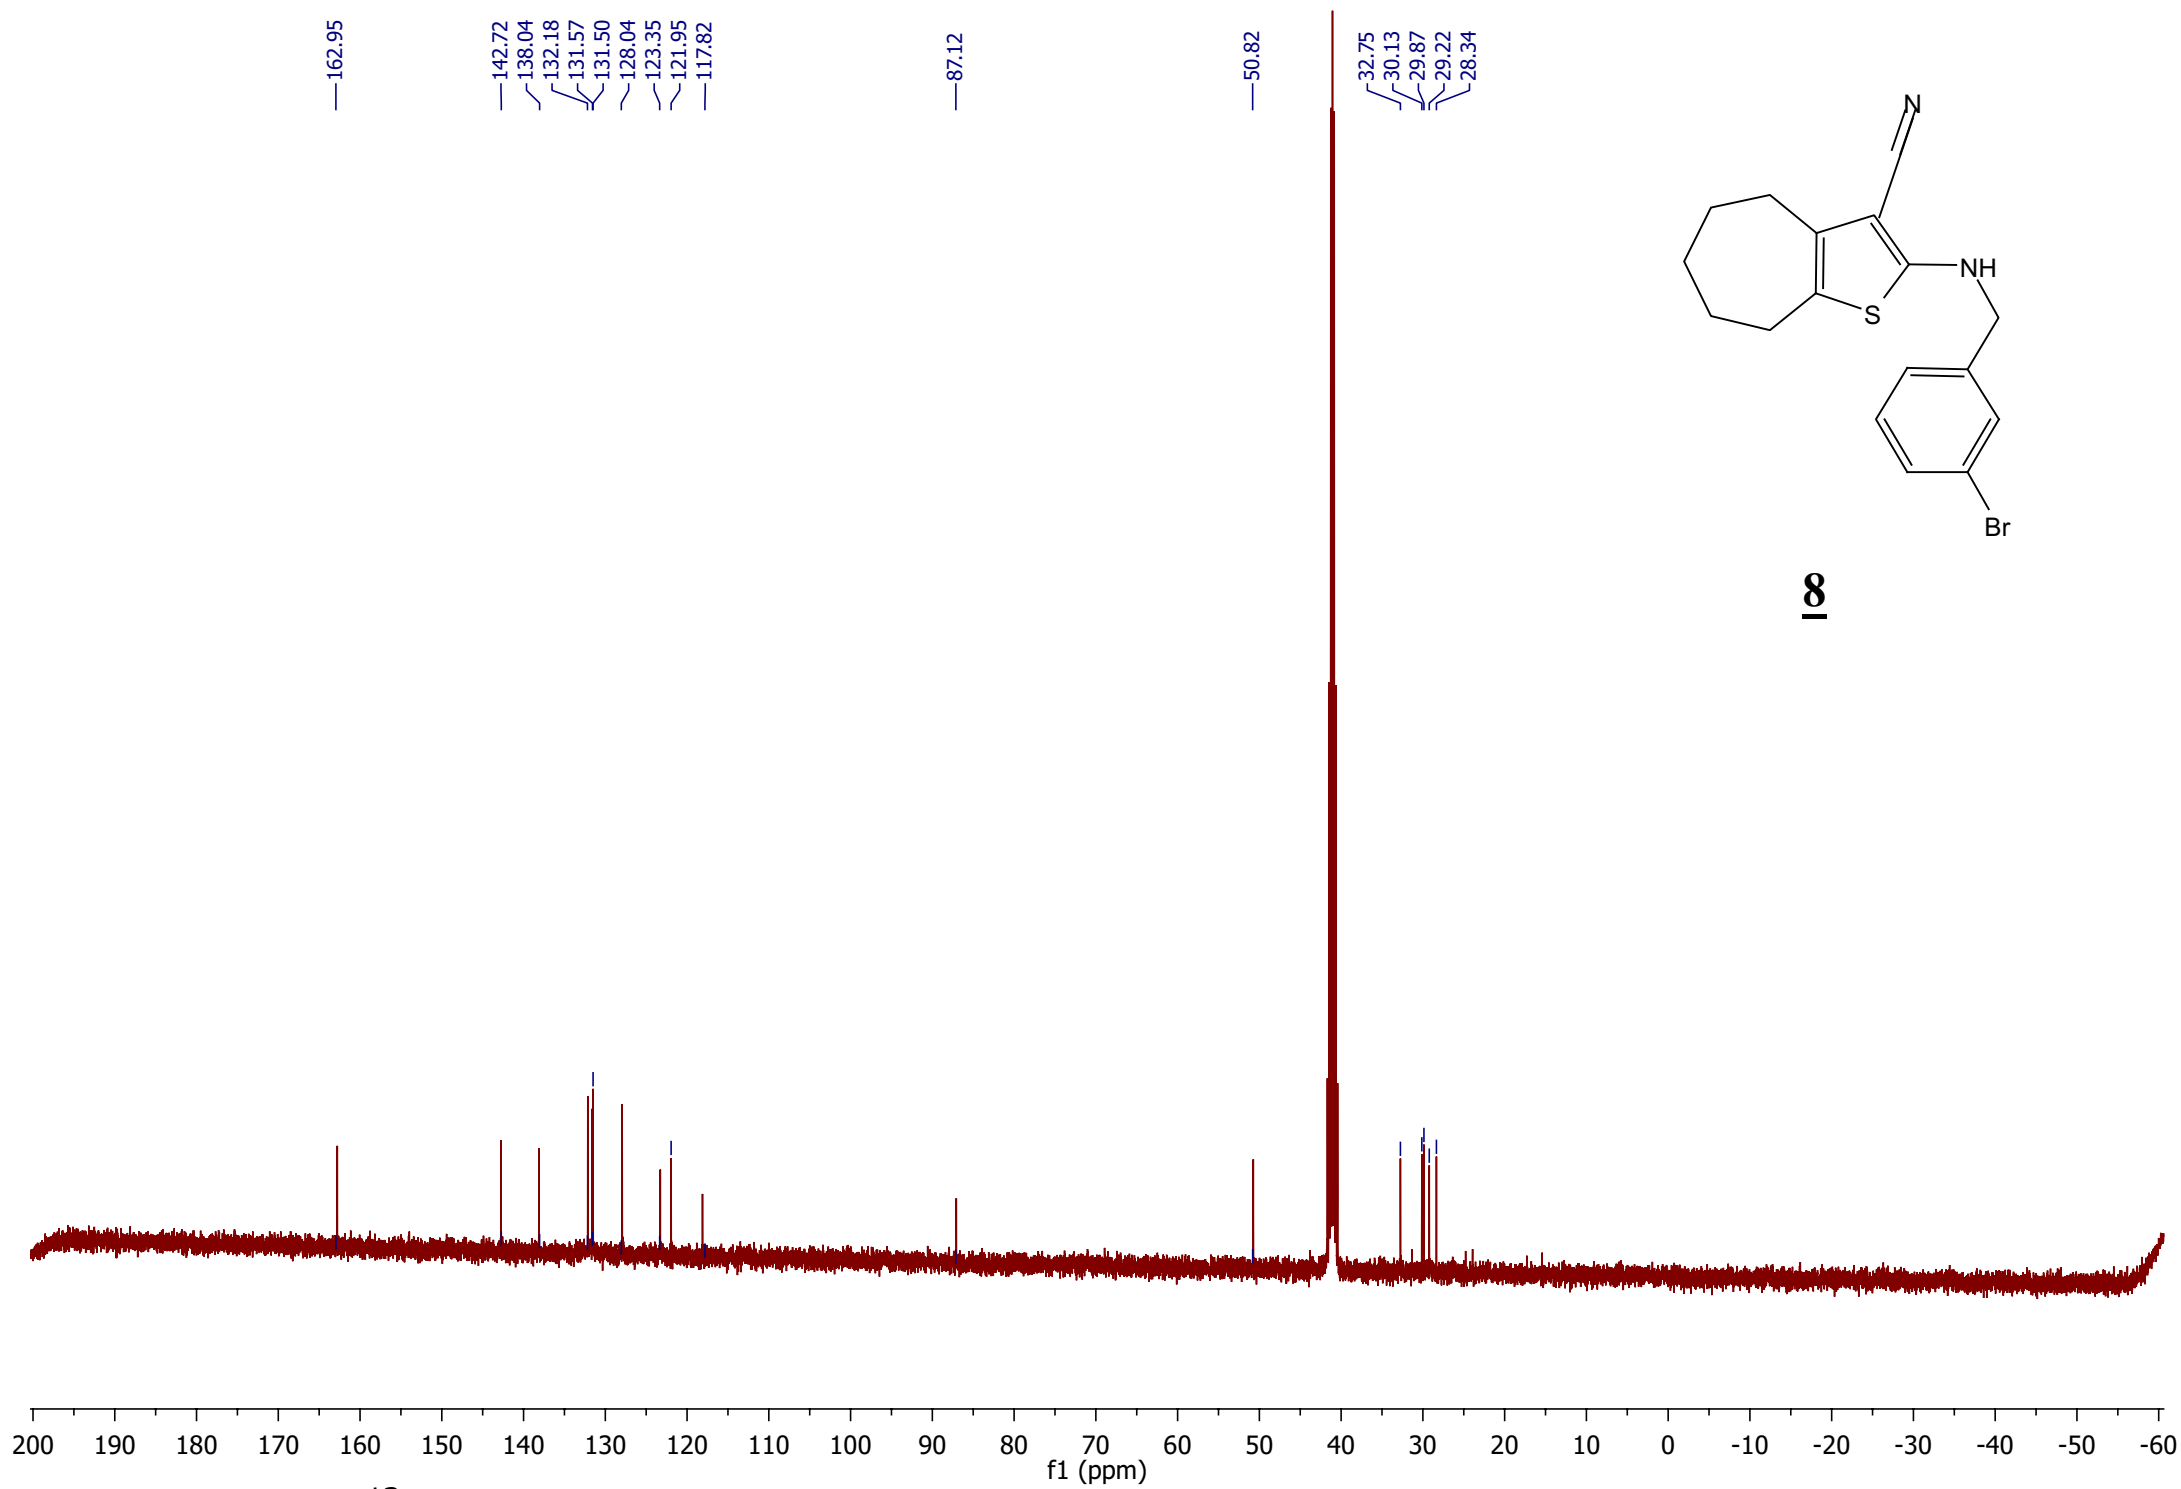

Figure S-13.  $^{13}\text{C}$ NMR of compound 8



## Elemental Composition Report

### Single Mass Analysis

Tolerance = 5.0 mDa / DBE: min = -5.0, max = 100.0

Element prediction: Off

Number of isotope peaks used for i-FIT = 5

Monoisotopic Mass, Even Electron Ions

539 formula(e) evaluated with 9 results within limits (all results (up to 1000) for each mass)

Elements Used:

C: 1-100 H: 1-200 N: 0-6 O: 0-10 S: 1-1 Br: 0-1

Salem/Abdelrahman

T01281934c 19 (0.679) Cm (5:22)

Sample #9

1: TOF MS ES+  
1.30e+005

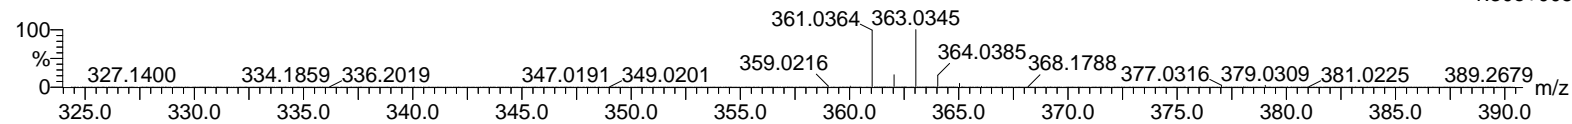

Minimum: -5.0  
Maximum: 5.0 15.0 100.0

| Mass     | Calc. Mass | mDa  | PPM  | DBE  | i-FIT  | i-FIT (Norm) | Formula            |
|----------|------------|------|------|------|--------|--------------|--------------------|
| 361.0363 | 361.0355   | 0.8  | 2.2  | 12.5 | 1041.0 | 28.2         | C13 H9 N6 O5 S     |
|          | 361.0374   | -1.1 | -3.0 | 9.5  | 1012.8 | 0.0          | C17 H18 N2 S Br    |
|          | 361.0382   | -1.9 | -5.3 | 11.5 | 1041.7 | 29.0         | C17 H13 O7 S       |
|          | 361.0342   | 2.1  | 5.8  | 7.5  | 1041.0 | 28.2         | C12 H13 N2 O9 S    |
|          | 361.0334   | 2.9  | 8.0  | 5.5  | 1024.5 | 11.7         | C12 H18 N4 O2 S Br |
|          | 361.0393   | -3.0 | -8.3 | -3.5 | 1031.0 | 18.2         | C5 H22 N4 O7 S Br  |
|          | 361.0395   | -3.2 | -8.9 | 16.5 | 1041.7 | 28.9         | C18 H9 N4 O3 S     |
|          | 361.0323   | 4.0  | 11.1 | 20.5 | 1042.6 | 29.9         | C24 H9 O2 S        |
|          | 361.0320   | 4.3  | 11.9 | 0.5  | 1025.5 | 12.8         | C11 H22 O6 S Br    |

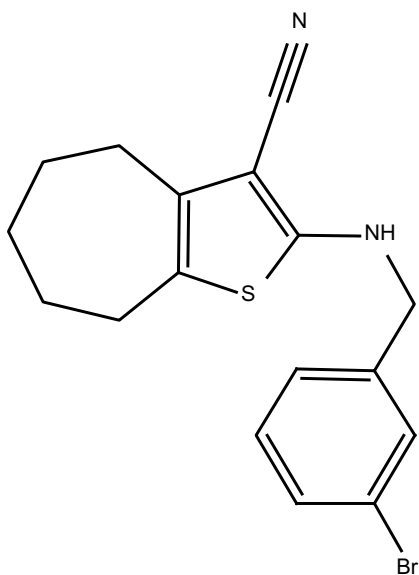

**8**

Figure S-14. HRMS of compound 8

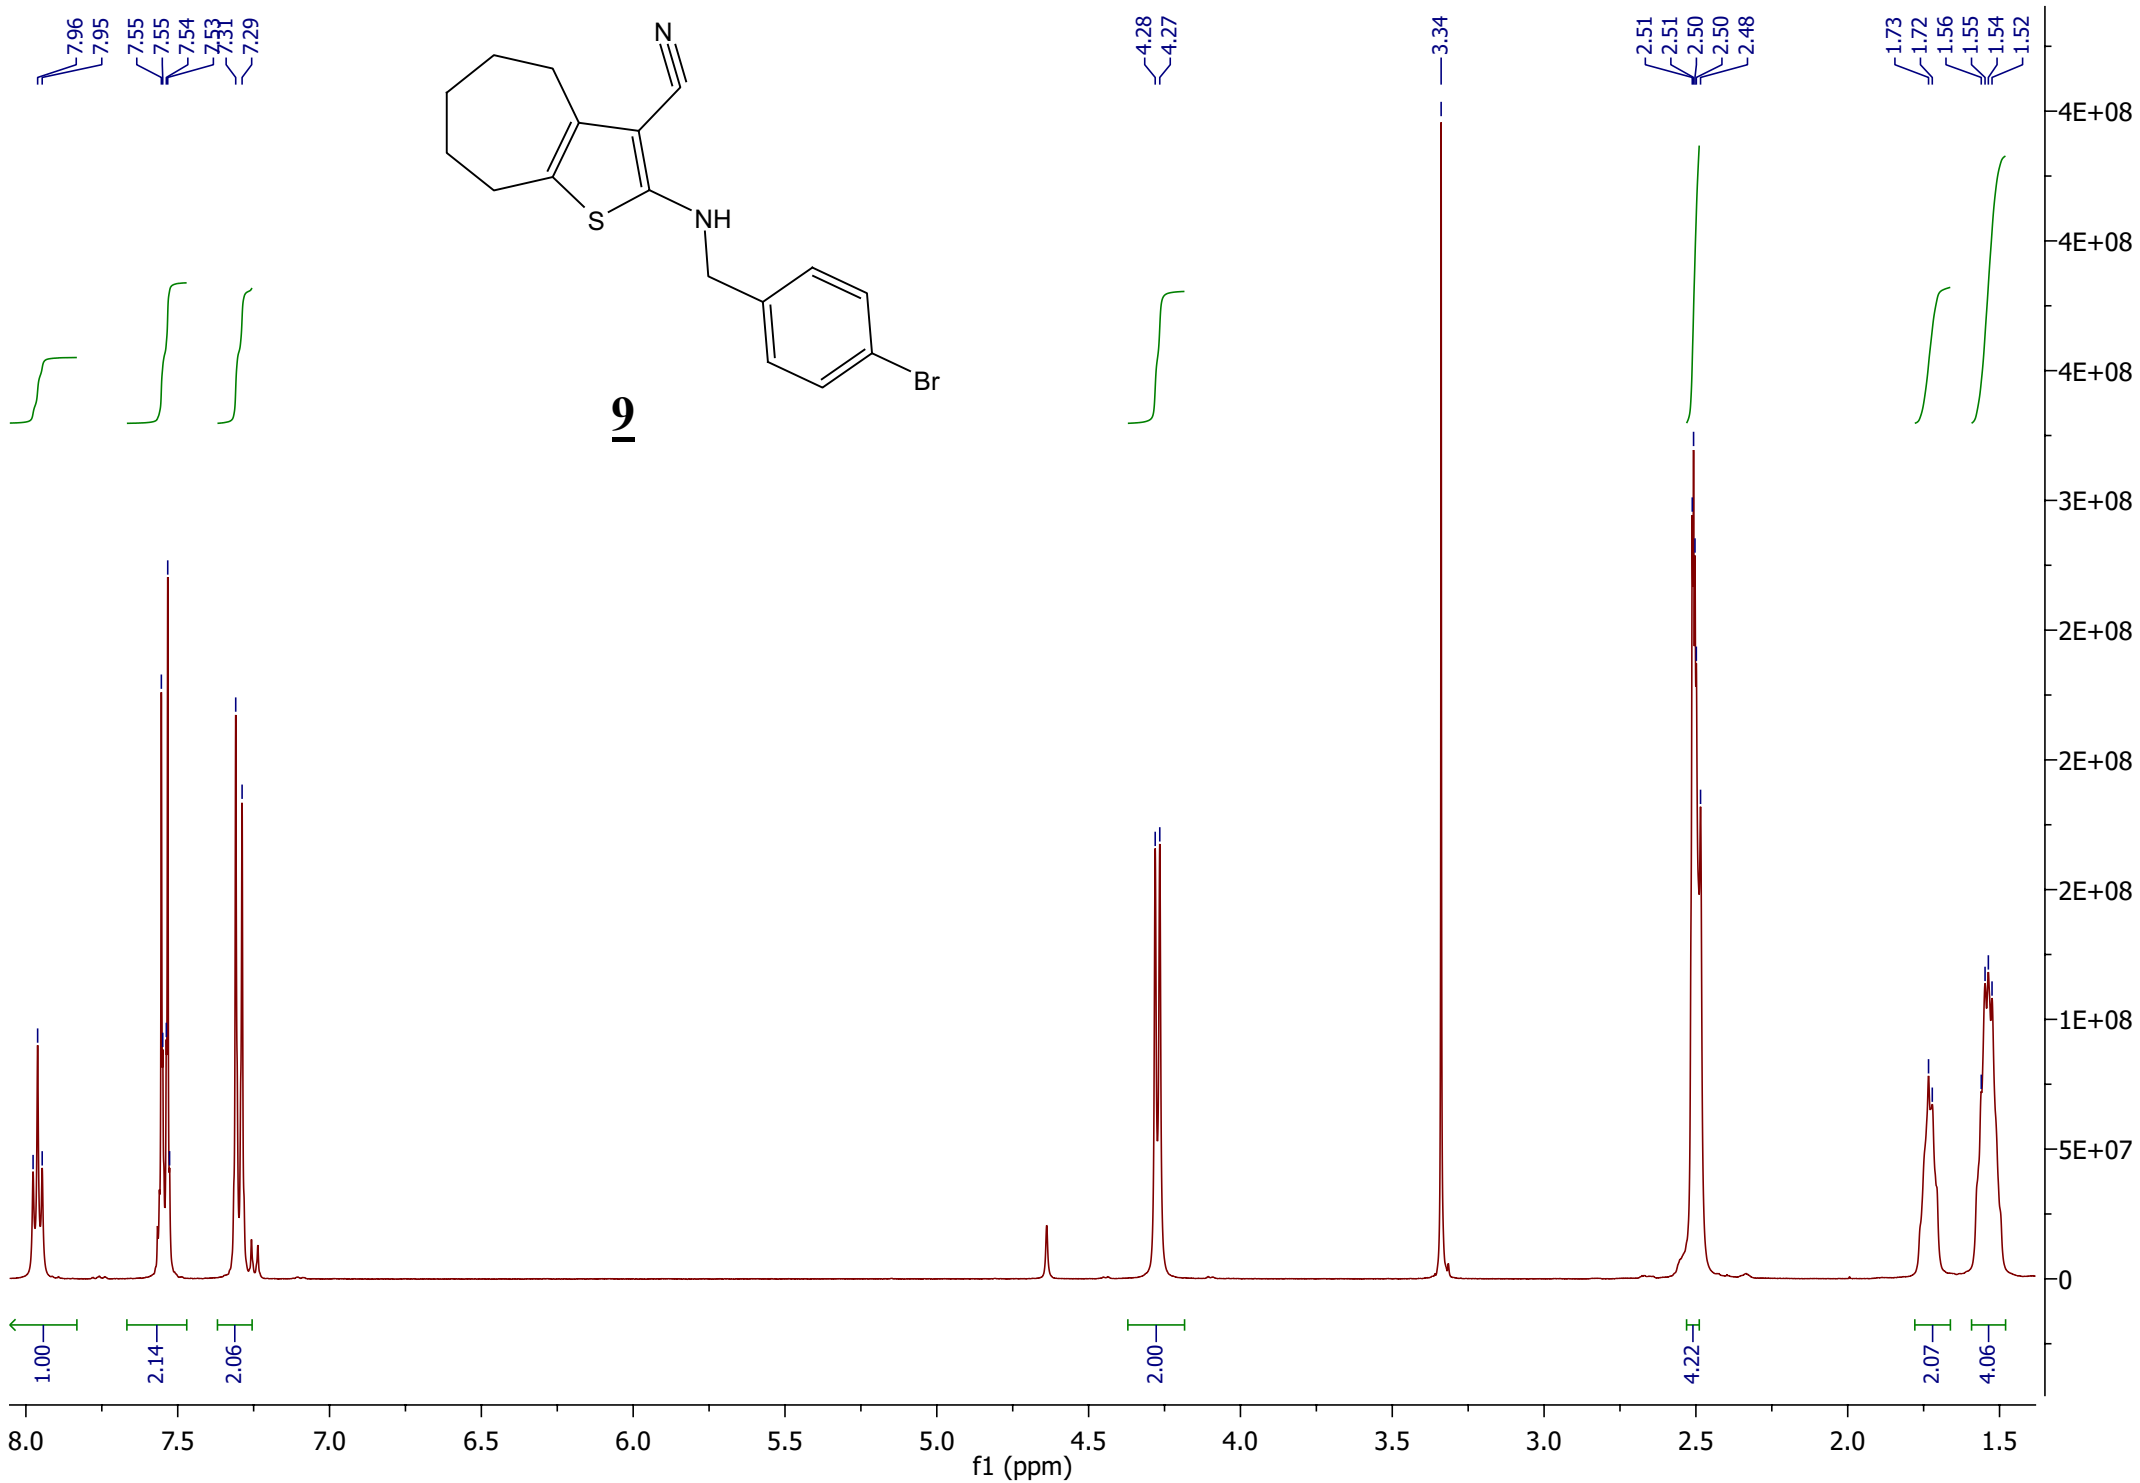

Figure S-15.  $^1\text{H}$ NMR of compound 9

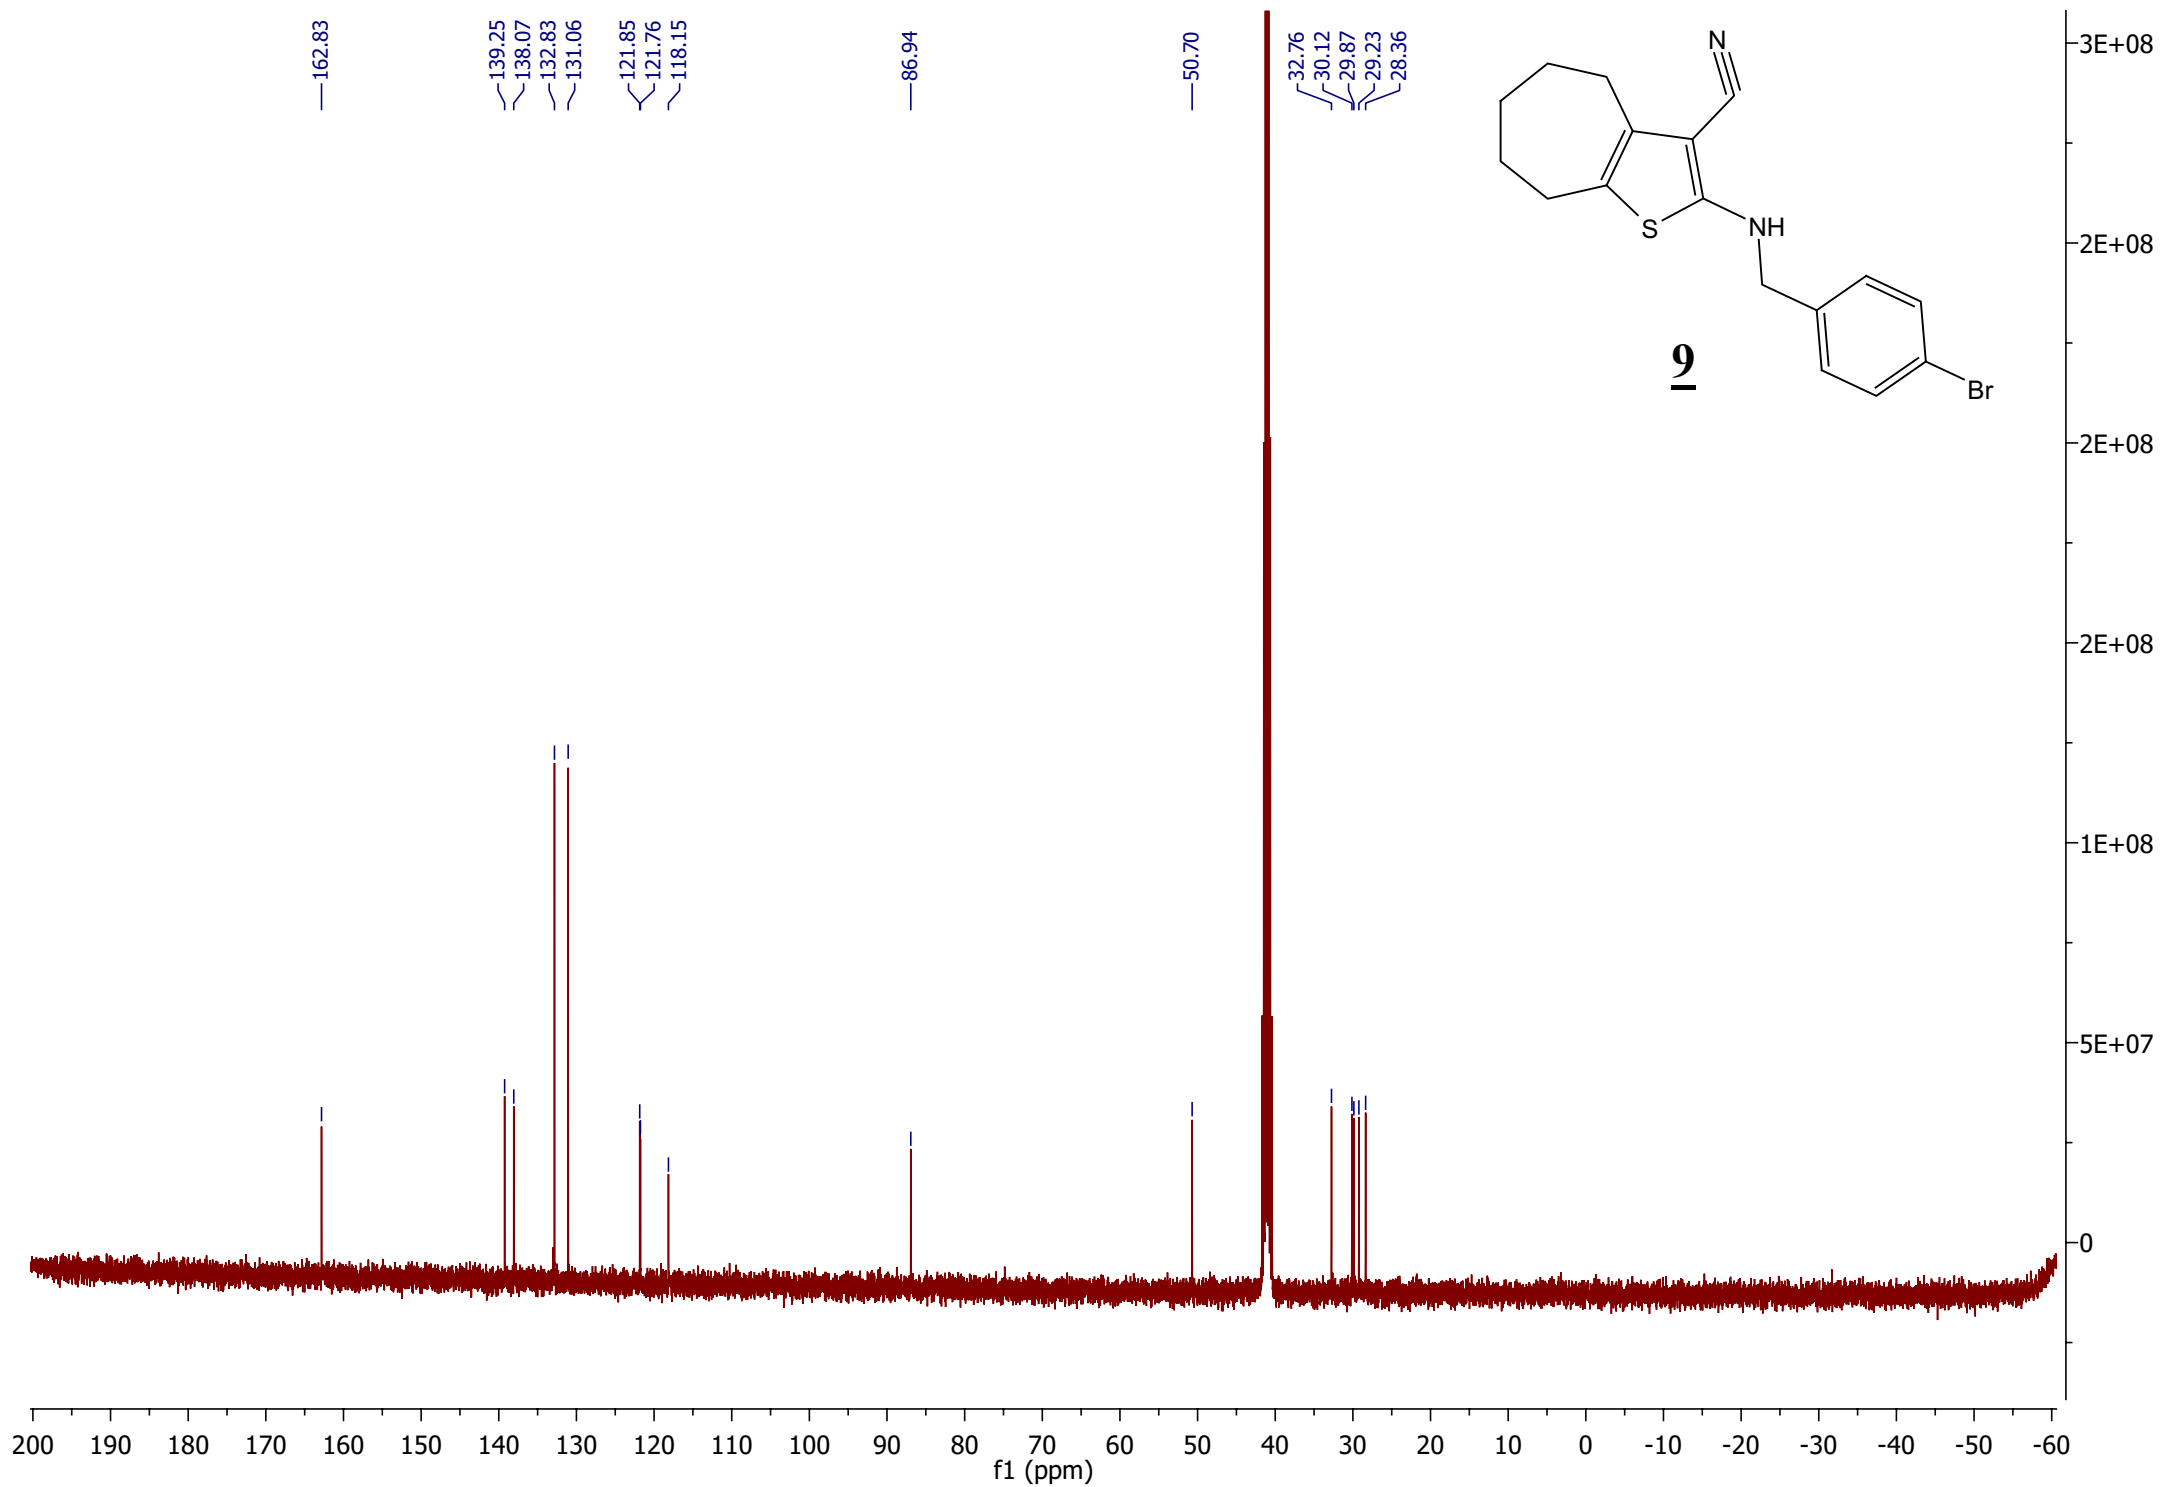

# Elemental Composition Report

## Single Mass Analysis

Tolerance = 5.0 mDa / DBE: min = -5.0, max = 100.0

Element prediction: Off

Number of isotope peaks used for i-FIT = 5

Monoisotopic Mass, Even Electron Ions

384 formula(e) evaluated with 6 results within limits (all results (up to 1000) for each mass)

Elements Used:

C: 1-100 H: 1-200 N: 0-6 O: 0-6 S: 1-1 Br: 0-1

Salem/Abdelrahman  
T01311907a 10 (0.356) Cm (9:16)

Sample #16

1: TOF MS ES+  
2.88e+004

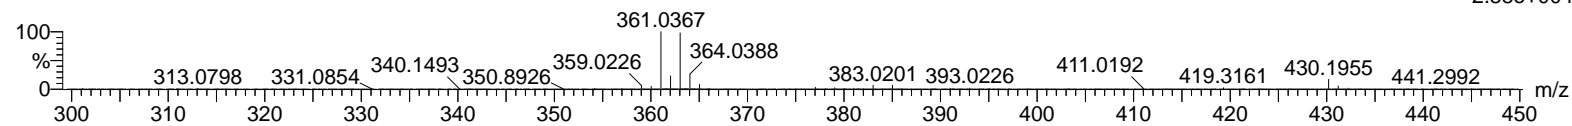

Minimum: -5.0  
Maximum: 5.0 15.0 100.0

| Mass            | Calc. Mass      | mDa  | PPM  | DBE  | i-FIT | i-FIT (Norm) | Formula                |
|-----------------|-----------------|------|------|------|-------|--------------|------------------------|
| <b>361.0366</b> | <b>361.0374</b> | -0.8 | -2.2 | 9.5  | 744.4 | 0.0          | <b>C17 H18 N2 S Br</b> |
| 361.0355        |                 | 1.1  | 3.0  | 12.5 | 759.5 | 15.1         | C13 H9 N6 O5 S         |
| 361.0395        |                 | -2.9 | -8.0 | 16.5 | 760.2 | 15.9         | C18 H9 N4 O3 S         |
| 361.0334        |                 | 3.2  | 8.9  | 5.5  | 749.0 | 4.6          | C12 H18 N4 O2 S Br     |
| 361.0323        |                 | 4.3  | 11.9 | 20.5 | 761.2 | 16.8         | C24 H9 O2 S            |
| 361.0320        |                 | 4.6  | 12.7 | 0.5  | 750.4 | 6.0          | C11 H22 O6 S Br        |

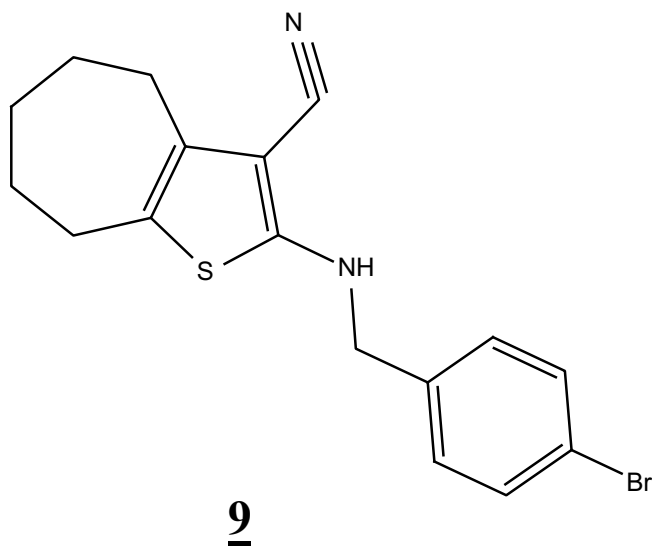

Figure S-17. HRMS of compound 9

7.89  
7.87  
7.86  
7.40  
7.38  
7.36  
7.33  
7.32  
7.31  
7.29  
7.20  
7.18  
7.16  
7.15

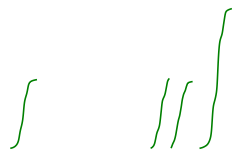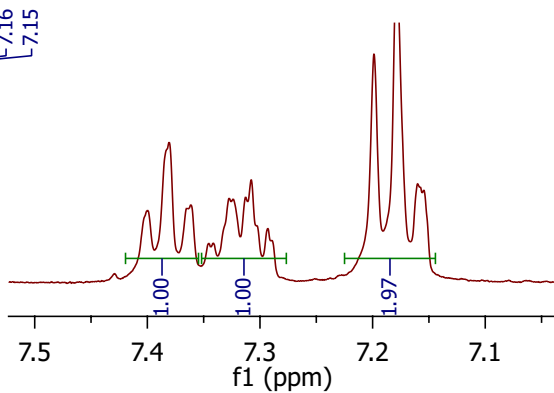

4.35  
4.33

3.31

2.49  
2.49

1.73  
1.71  
1.54  
1.53  
1.52

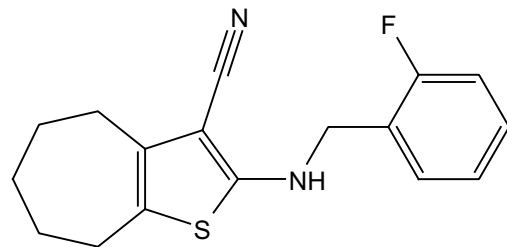

**10**

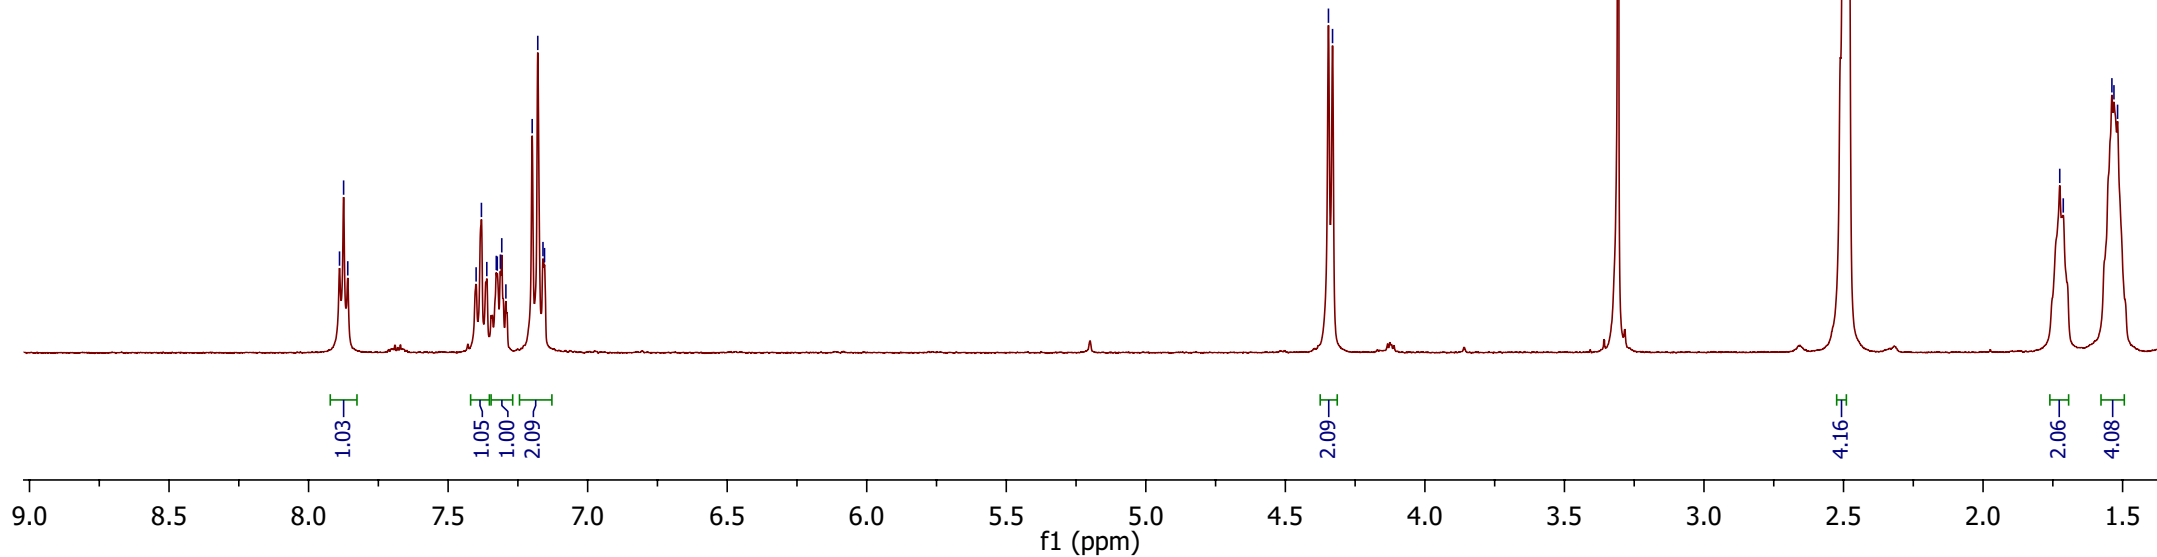

Figure S-18. <sup>1</sup>H NMR of compound 10

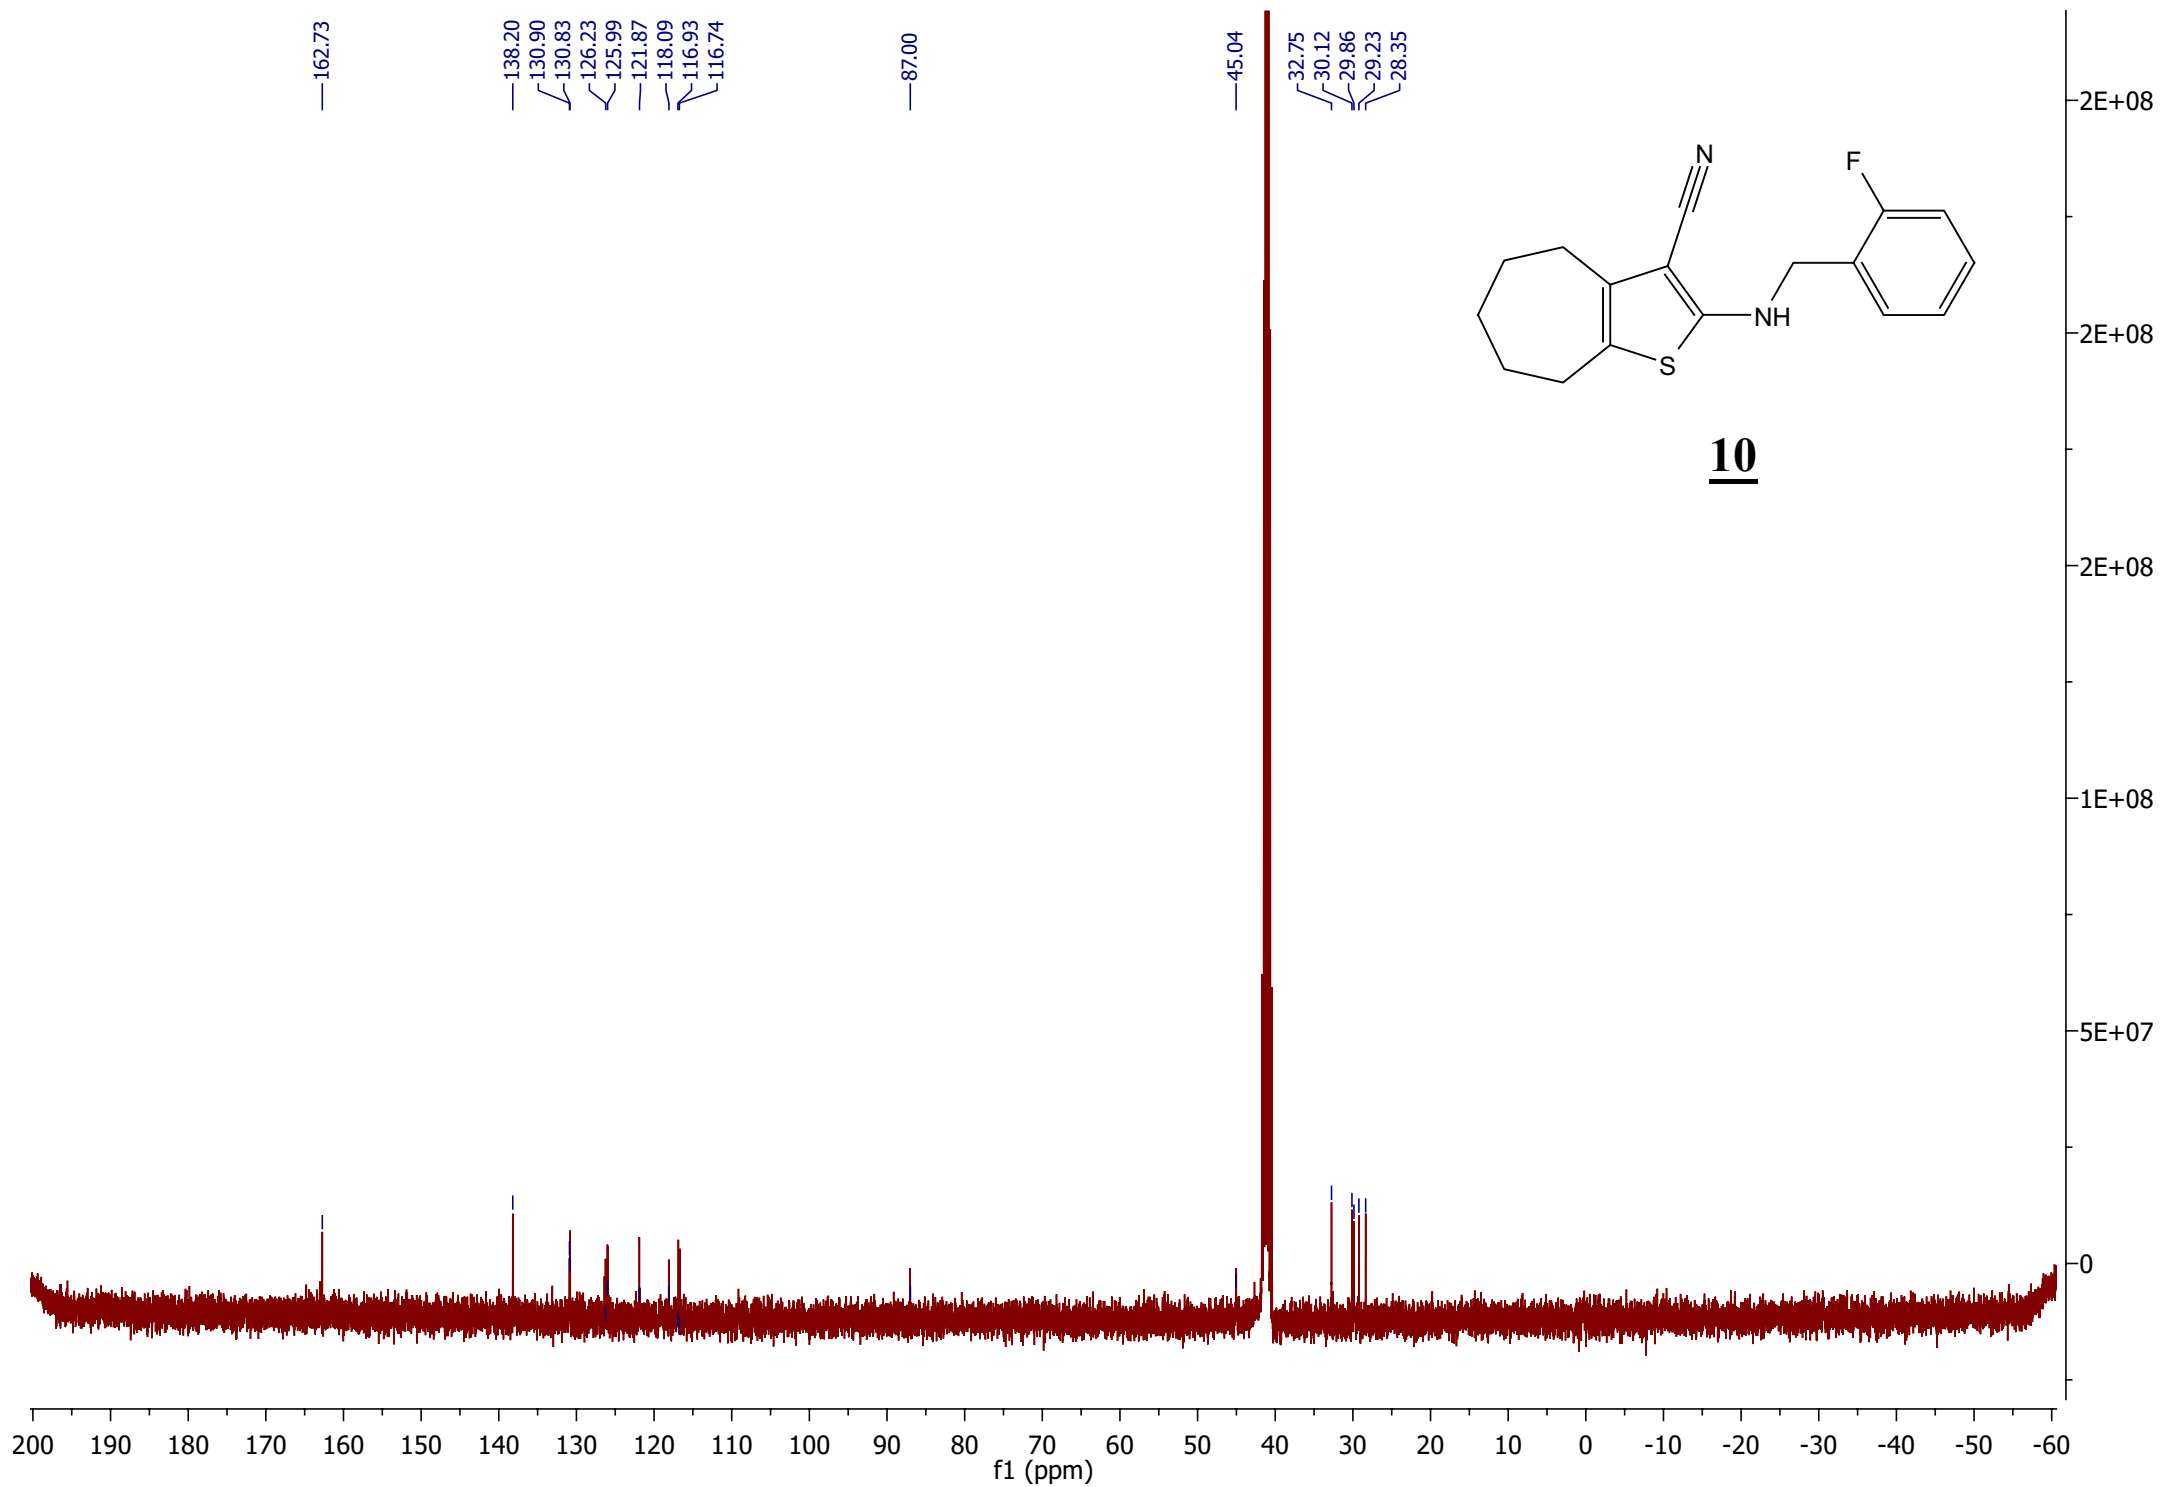

Figure S-19. <sup>13</sup>CNMR of compound 10

# Elemental Composition Report

## Single Mass Analysis

Tolerance = 5.0 mDa / DBE: min = -5.0, max = 100.0

Element prediction: Off

Number of isotope peaks used for i-FIT = 5

Monoisotopic Mass, Even Electron Ions

478 formula(e) evaluated with 8 results within limits (all results (up to 1000) for each mass)

Elements Used:

C: 1-100 H: 1-200 N: 0-6 O: 0-10 F: 0-1 S: 1-1

Salem/Abdelrahman

Sample #15

T01311904a 9 (0.322) Cm (9:14)

1: TOF MS ES+  
3.33e+004

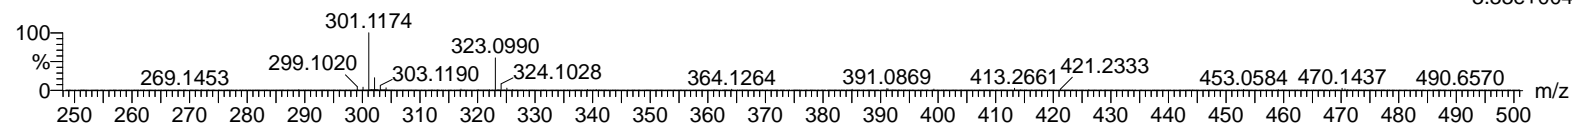

Minimum: -5.0  
Maximum: 5.0 15.0 100.0

| Mass            | Calc. Mass | mDa  | PPM  | DBE  | i-FIT | i-FIT (Norm) | Formula               |
|-----------------|------------|------|------|------|-------|--------------|-----------------------|
| <b>301.1171</b> | 301.1168   | 0.3  | 1.0  | -4.5 | 805.2 | 5.6          | C7 H25 O10 S          |
| <b>301.1175</b> | 301.1175   | -0.4 | -1.3 | 9.5  | 799.9 | 0.2          | <b>C17 H18 N2 F S</b> |
| 301.1182        | 301.1182   | -1.1 | -3.7 | 0.5  | 804.4 | 4.7          | C8 H21 N4 O6 S        |
| 301.1193        | 301.1193   | -2.2 | -7.3 | -3.5 | 805.9 | 6.2          | C5 H22 N4 O7 F S      |
| 301.1142        | 301.1142   | 2.9  | 9.6  | -3.5 | 807.0 | 7.3          | C3 H21 N6 O8 S        |
| 301.1135        | 301.1135   | 3.6  | 12.0 | 5.5  | 803.3 | 3.6          | C12 H18 N4 O2 F S     |
| 301.1123        | 301.1123   | 4.8  | 15.9 | 9.5  | 801.5 | 1.8          | C15 H17 N4 O S        |
| 301.1121        | 301.1121   | 5.0  | 16.6 | 0.5  | 803.8 | 4.2          | C11 H22 O6 F S        |

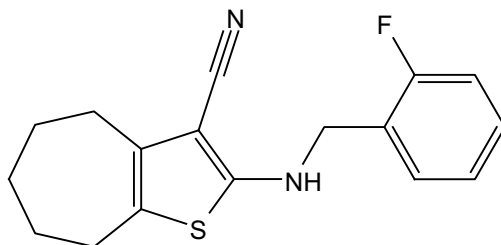

**10**

Figure S-20. HRMS of compound 10

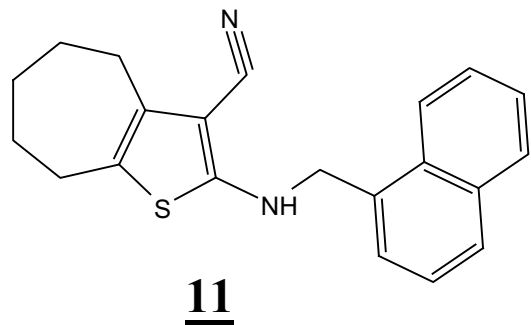

8.08  
8.06  
8.02  
8.00  
7.99  
7.97  
7.95  
7.67  
7.66  
7.65  
7.64  
7.63  
7.61  
7.59  
7.57  
7.55  
7.54  
7.51  
7.49  
7.36

5.22

4.87

2.76  
2.74  
2.73  
2.72  
2.70

1.92  
1.79  
1.76  
1.74

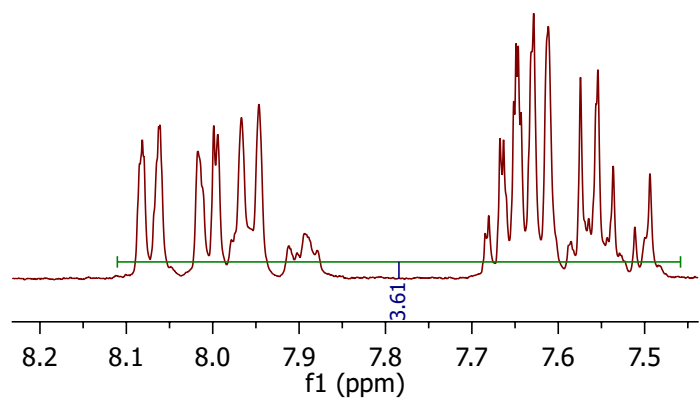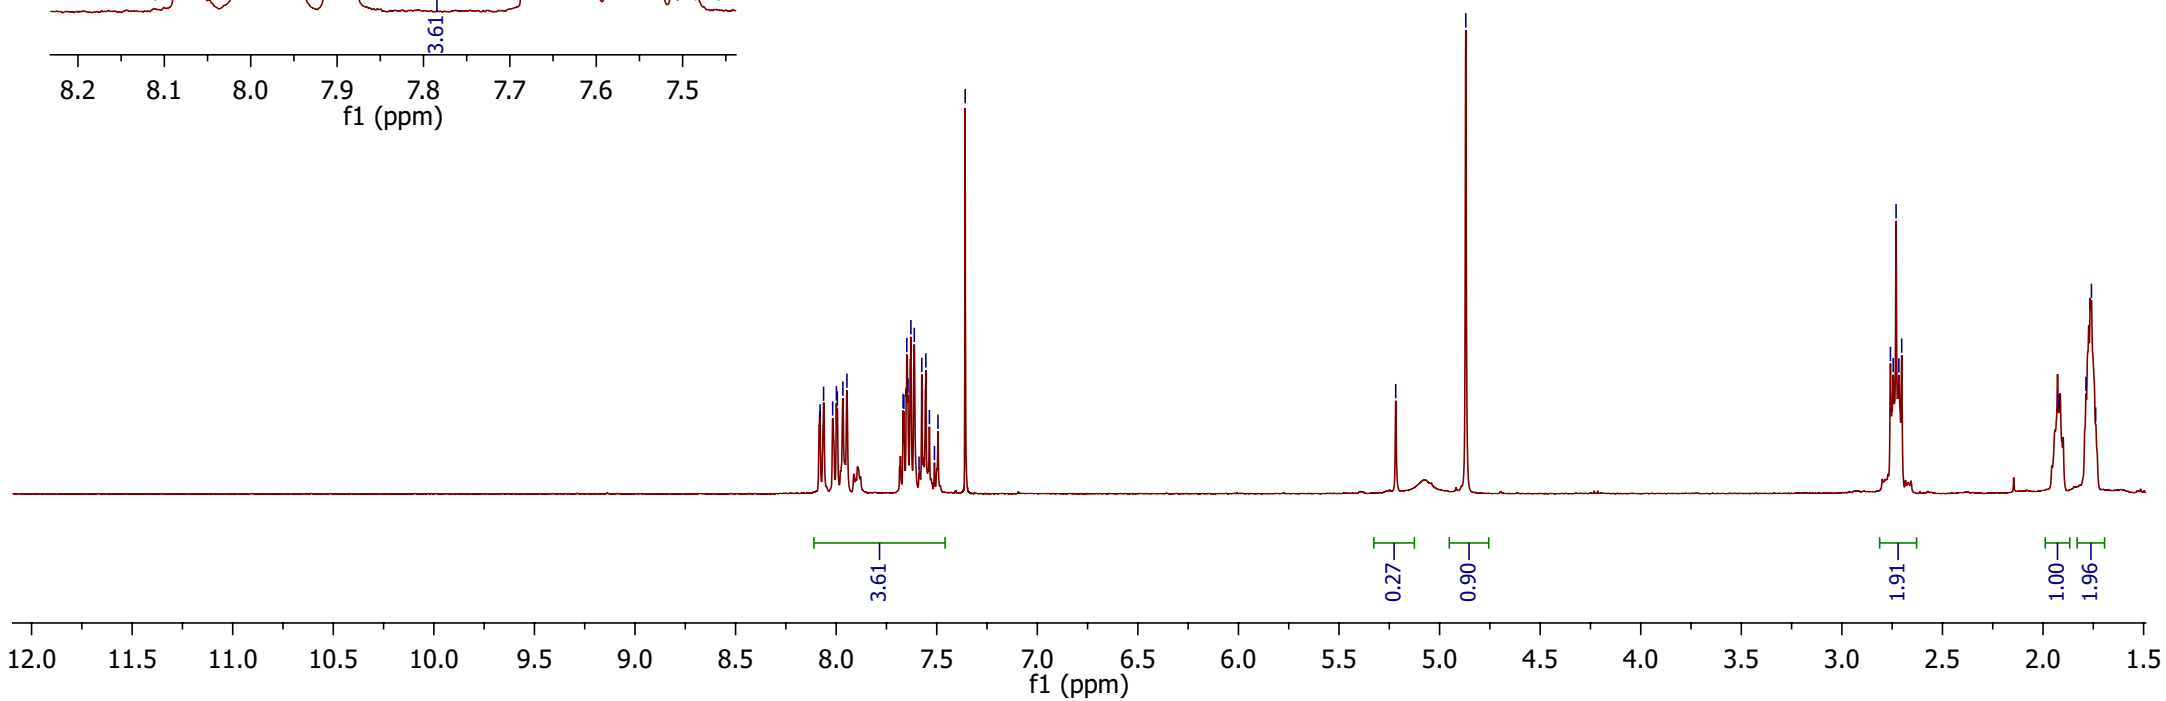

Figure S-21.  $^1\text{H}$ NMR of compound 11



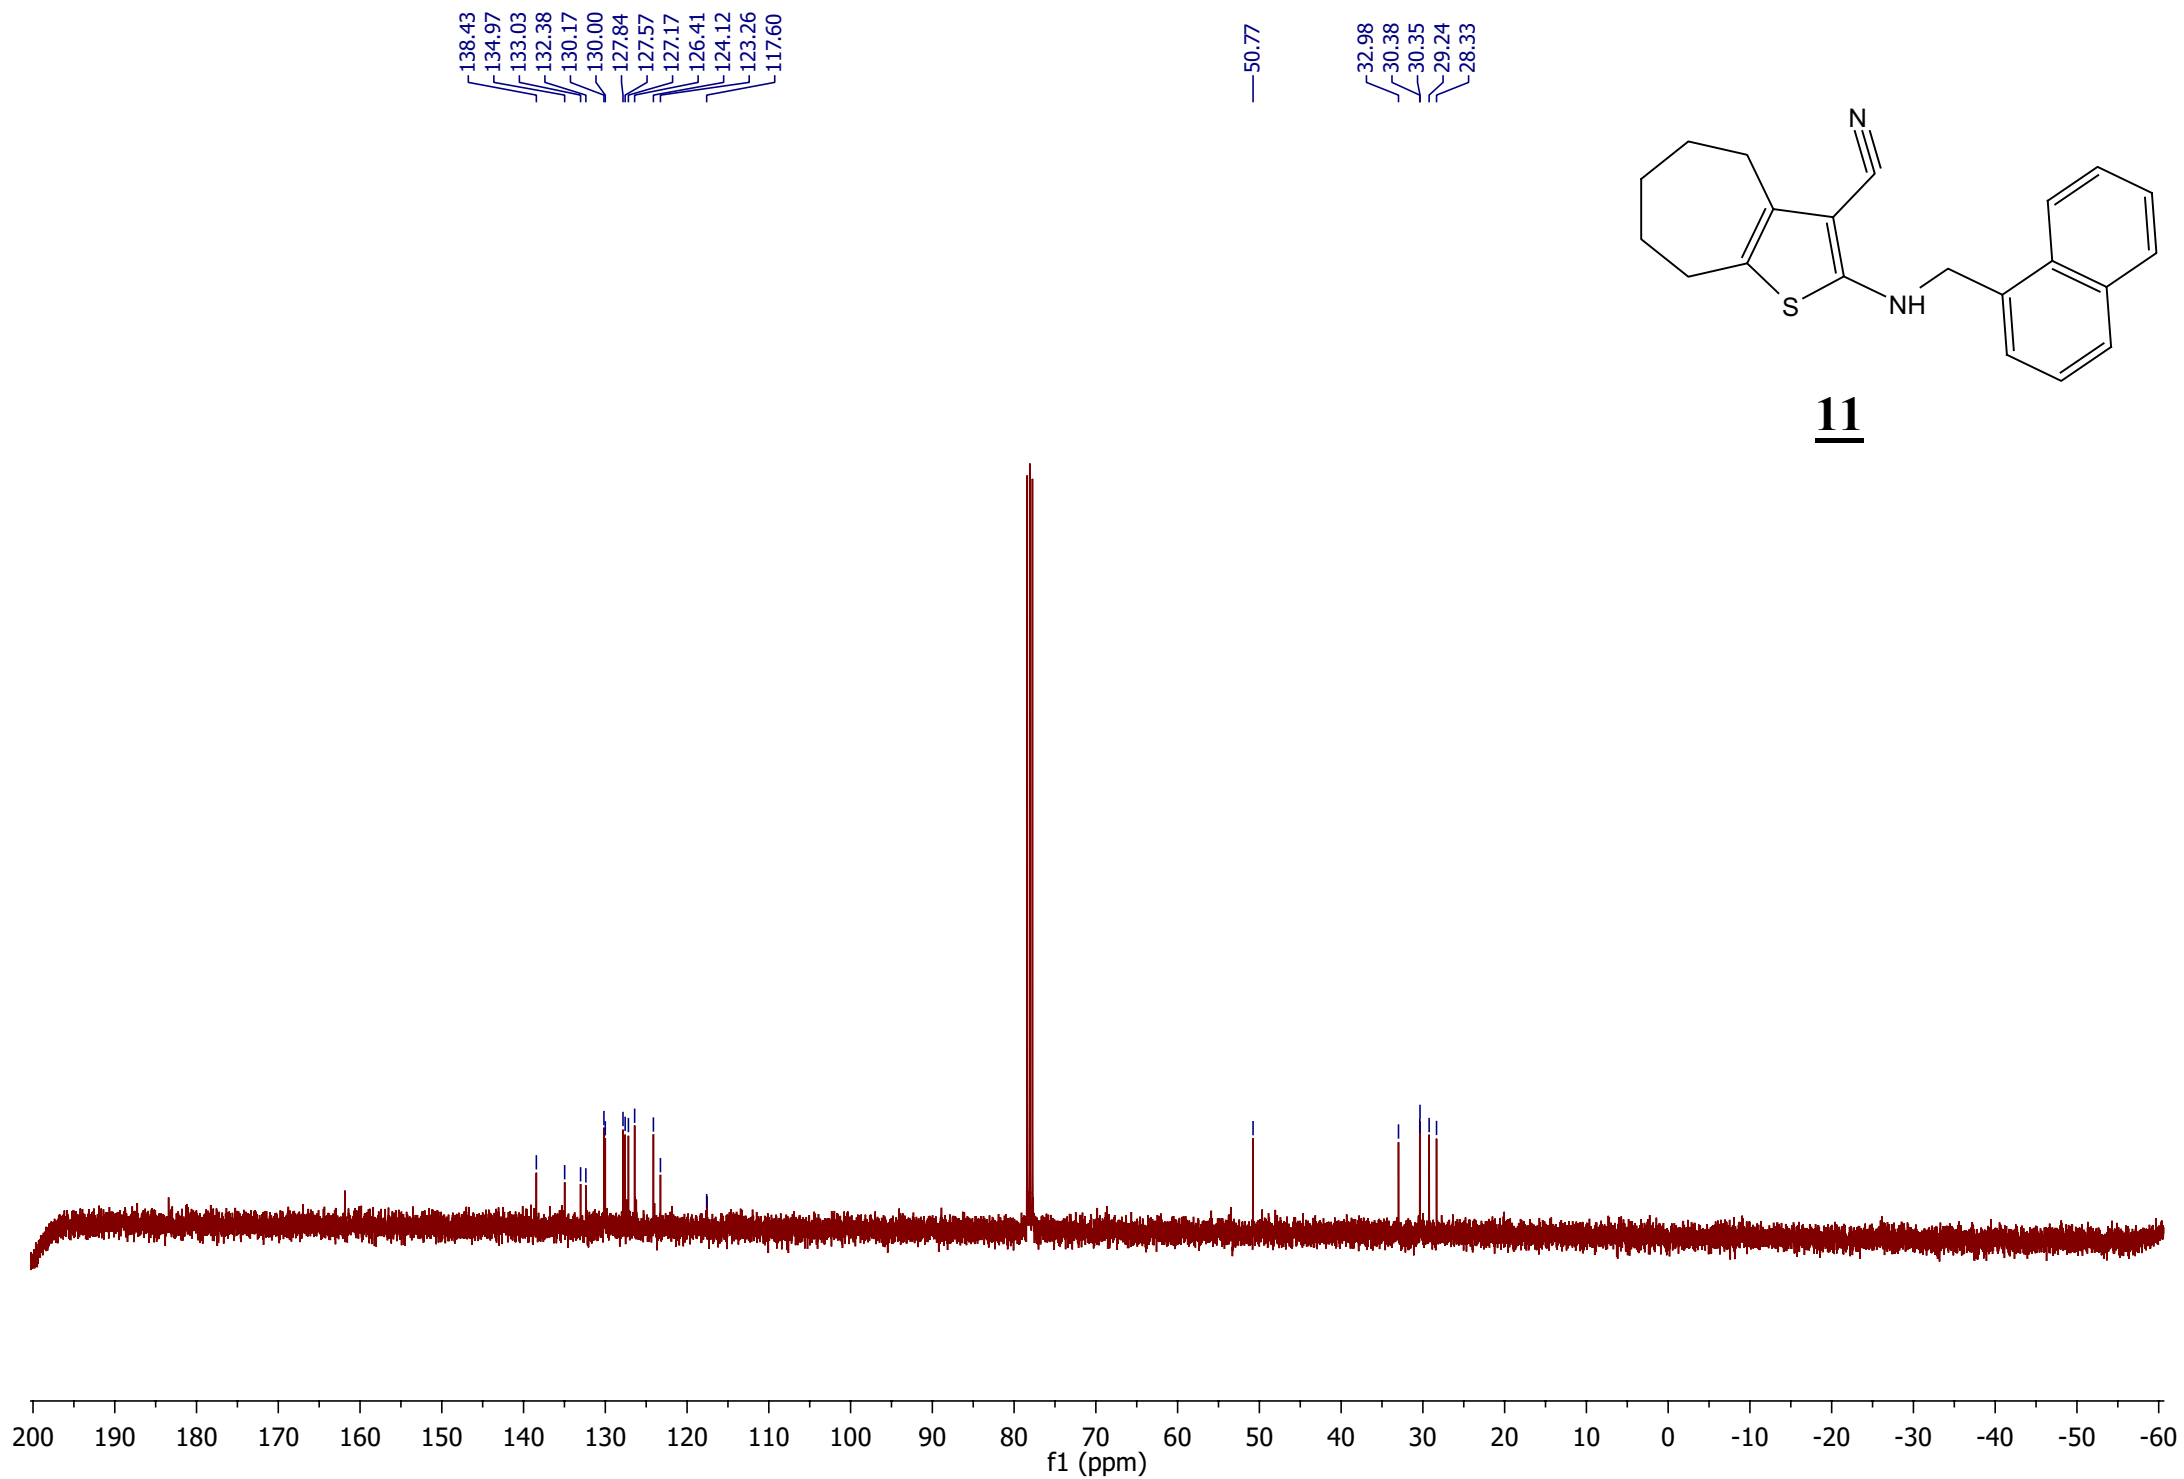

# Elemental Composition Report

## Single Mass Analysis

Tolerance = 5.0 mDa / DBE: min = -5.0, max = 100.0

Element prediction: Off

Number of isotope peaks used for i-FIT = 5

Monoisotopic Mass, Even Electron Ions

835 formula(e) evaluated with 11 results within limits (all results (up to 1000) for each mass)

Elements Used:

C: 1-100 H: 1-200 N: 0-5 O: 0-12 S: 0-2

Salem/Abdelrahman

Sample #38

T03251908a 9 (0.322) Cm (8:15)

1: TOF MS ES+  
3.77e+004

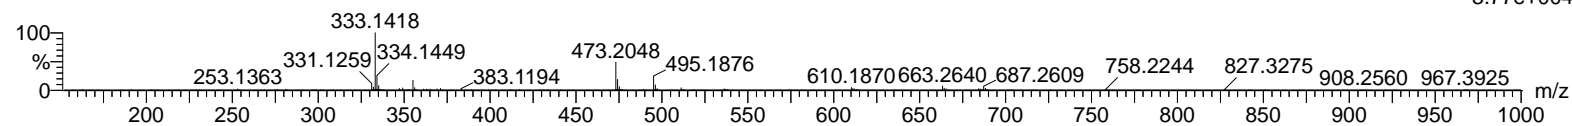

Minimum: -5.0  
Maximum: 5.0 15.0 100.0

| Mass            | Calc. Mass      | mDa  | PPM   | DBE  | i-FIT | i-FIT (Norm) | Formula             |
|-----------------|-----------------|------|-------|------|-------|--------------|---------------------|
| <b>333.1418</b> | 333.1419        | -0.1 | -0.3  | 3.5  | 861.3 | 12.2         | C13 H25 N4 O2 S2    |
|                 | <b>333.1425</b> | -0.7 | -2.1  | 12.5 | 849.0 | 0.0          | <b>C21 H21 N2 S</b> |
|                 | 333.1410        | 0.8  | 2.4   | 4.5  | 872.1 | 23.1         | C12 H21 N4 O7       |
|                 | 333.1406        | 1.2  | 3.6   | -1.5 | 862.9 | 13.9         | C12 H29 O6 S2       |
|                 | 333.1397        | 2.1  | 6.3   | -0.5 | 872.6 | 23.6         | C11 H25 O11         |
|                 | 333.1444        | -2.6 | -7.8  | -0.5 | 863.2 | 14.1         | C9 H25 N4 O7 S      |
|                 | 333.1392        | 2.6  | 7.8   | 17.5 | 870.9 | 21.9         | C24 H17 N2          |
|                 | 333.1450        | -3.2 | -9.6  | 8.5  | 871.1 | 22.1         | C17 H21 N2 O5       |
|                 | 333.1385        | 3.3  | 9.9   | 8.5  | 857.0 | 7.9          | C16 H21 N4 O2 S     |
|                 | 333.1459        | -4.1 | -12.3 | 7.5  | 859.5 | 10.5         | C18 H25 N2 S2       |
|                 | 333.1372        | 4.6  | 13.8  | 3.5  | 860.9 | 11.9         | C15 H25 O6 S        |

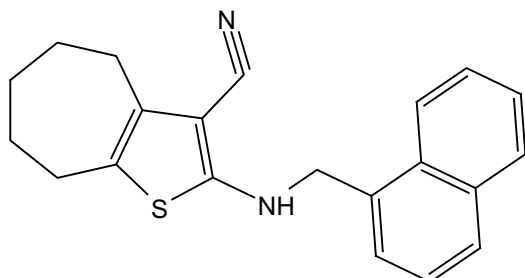

**11**

Figure S-23. HRMS of compound 11

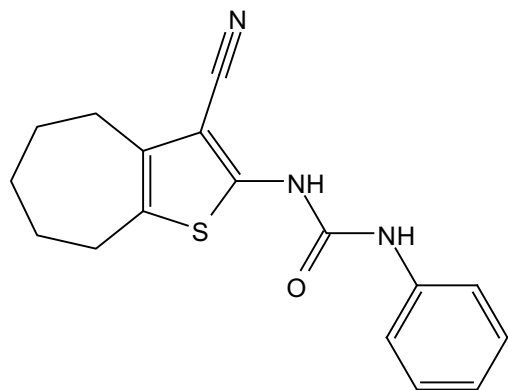

**12**

8.70  
7.74  
7.44  
7.42  
7.32  
7.30  
7.28  
7.24  
7.08  
7.08  
7.07  
7.05  
7.05

2.68  
2.67  
2.65  
2.64  
2.63  
1.83  
1.82  
1.79  
1.67  
1.66  
1.65  
1.63

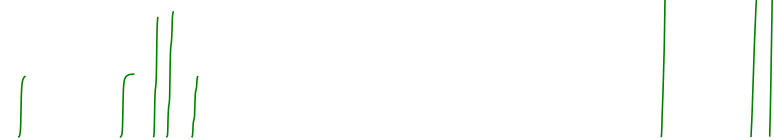

7.44  
7.42  
7.32  
7.30  
7.28  
7.24  
7.08  
7.08  
7.07  
7.05  
7.05

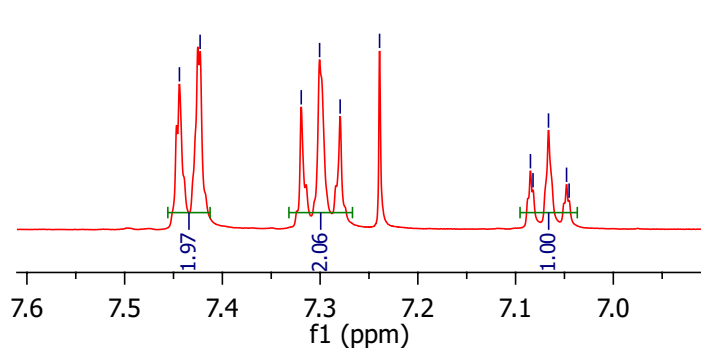

1.00  
1.03  
1.97  
2.06  
1.00

4.27  
2.25  
4.53

f1 (ppm)

Figure S-24. <sup>1</sup>H NMR of compound 12

152.21  
150.02

138.86  
135.92  
131.56  
130.19  
124.93  
120.62  
117.63  
117.18

93.39

32.99  
30.48  
30.19  
29.06  
28.41

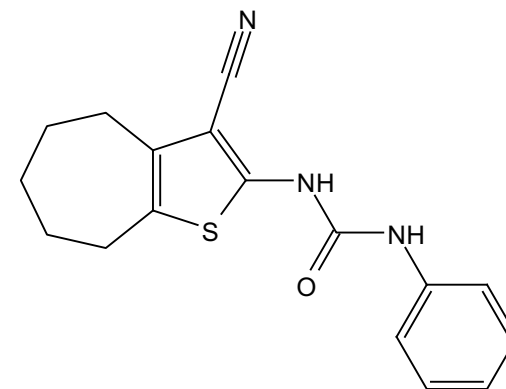

**12**

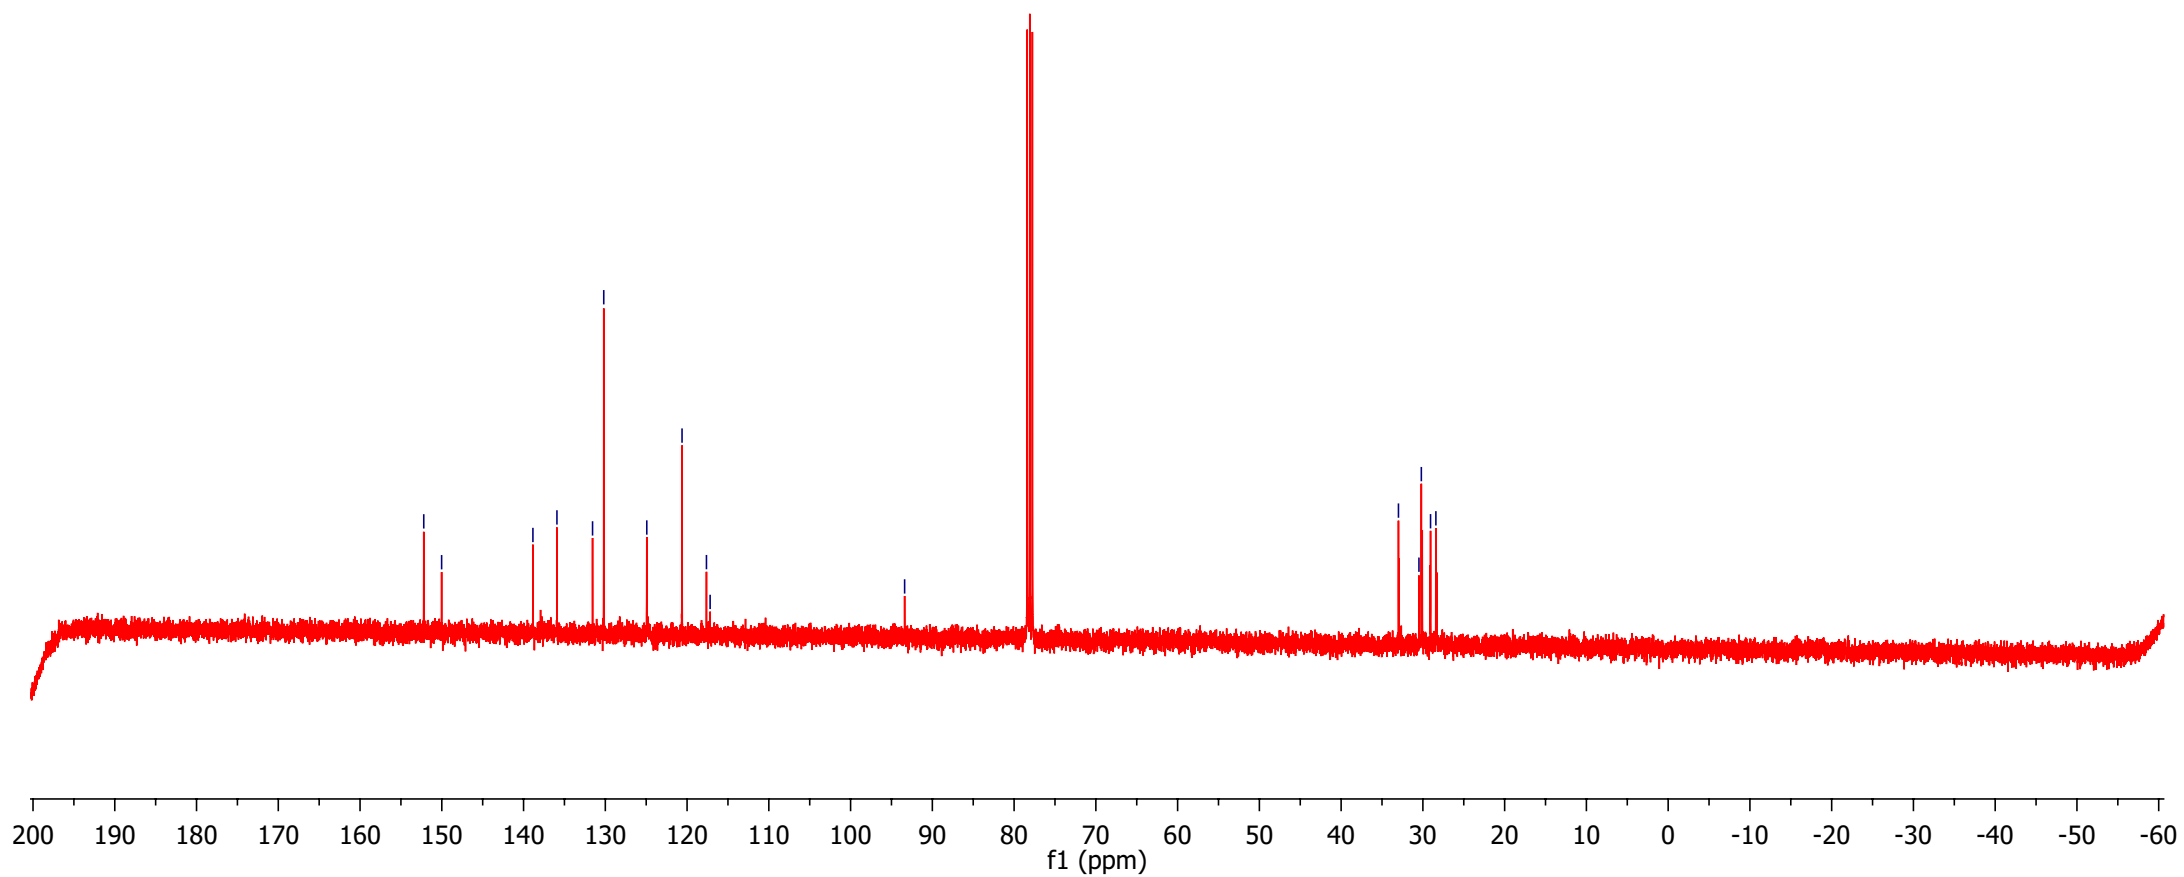

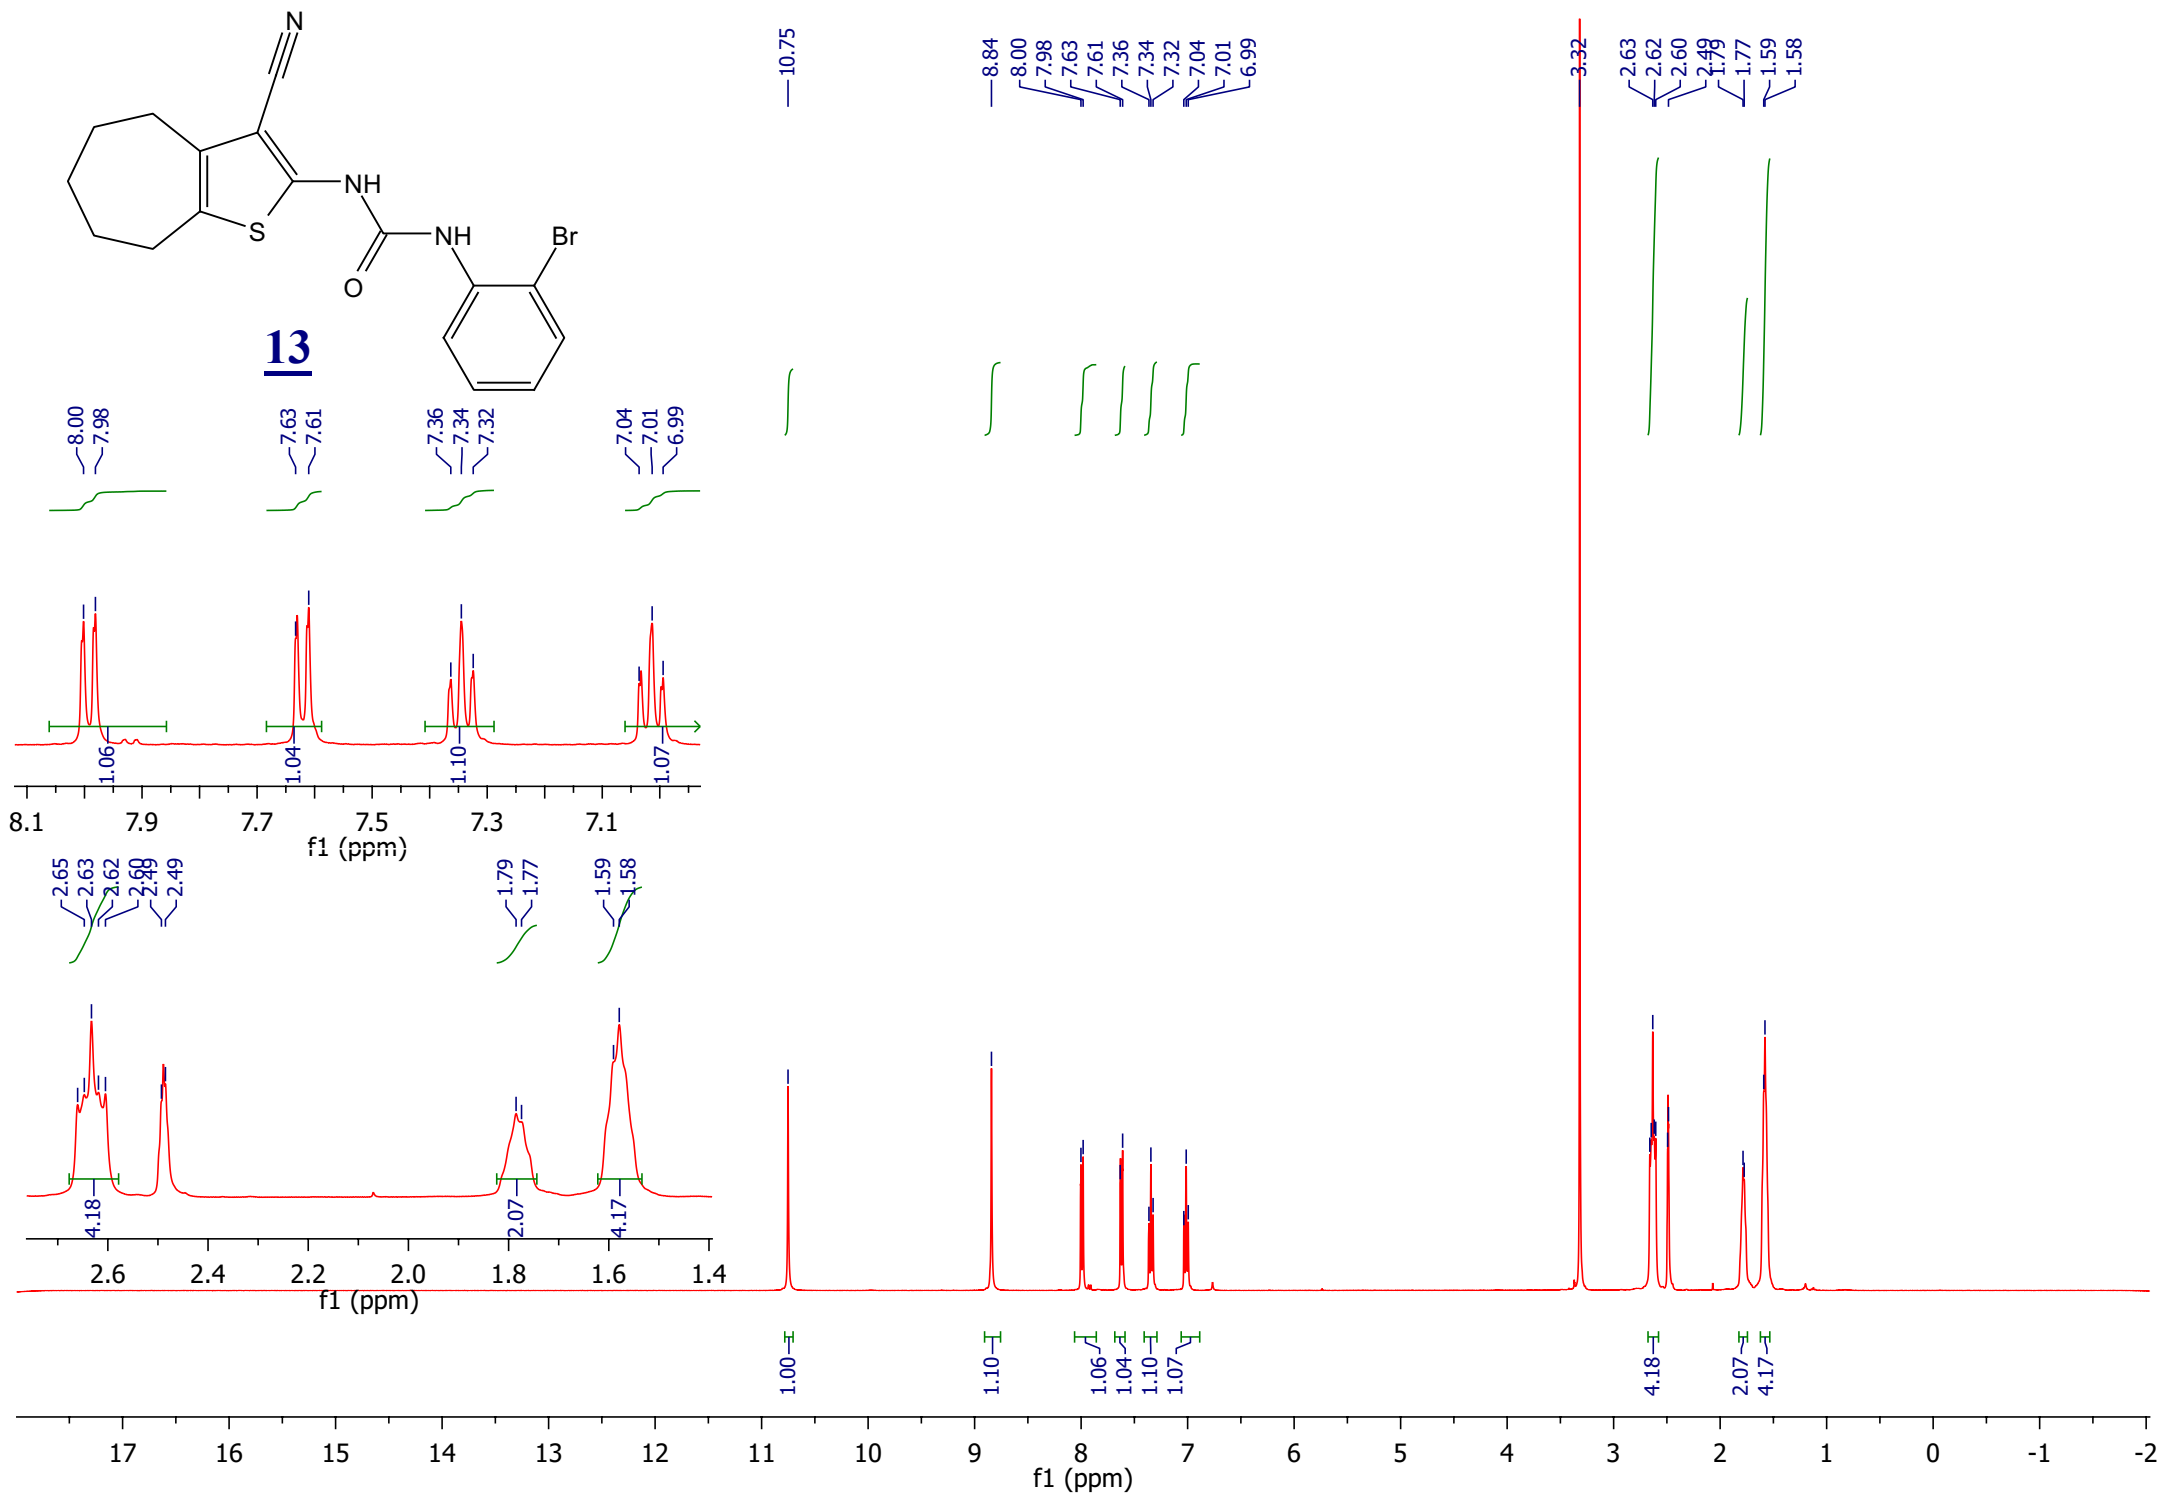

Figure S-26. <sup>1</sup>H NMR of compound 13

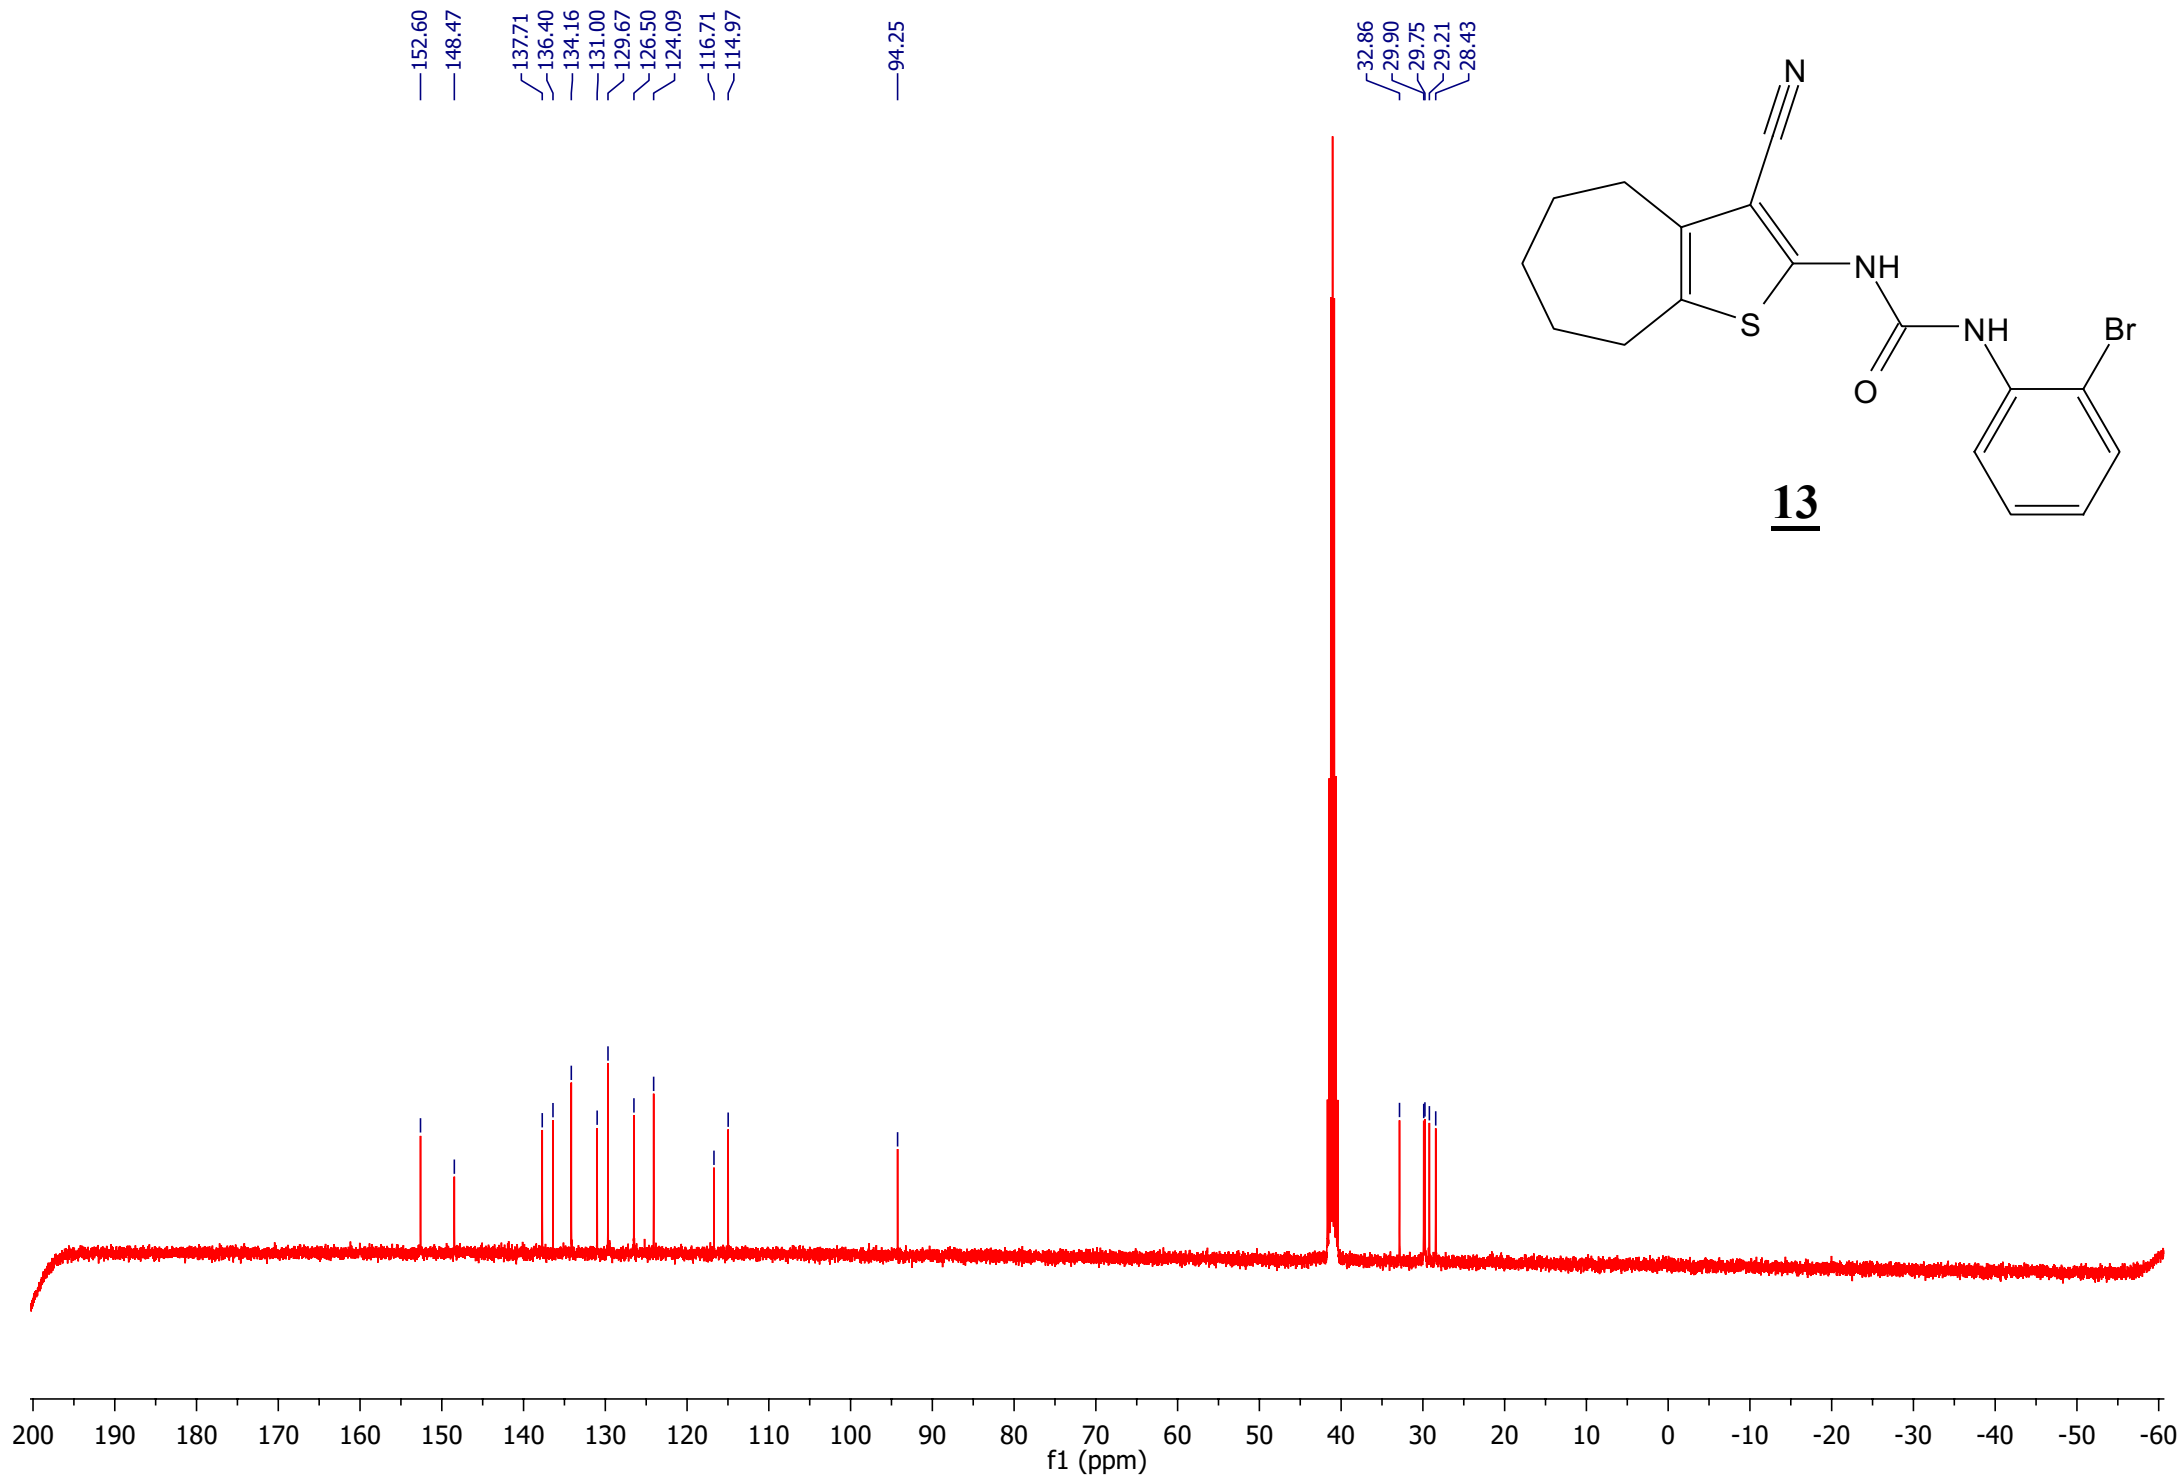

Figure S-27.  $^{13}\text{C}$ NMR of compound 13

# Elemental Composition Report

## Single Mass Analysis

Tolerance = 5.0 mDa / DBE: min = -5.0, max = 100.0

Element prediction: Off

Number of isotope peaks used for i-FIT = 5

Monoisotopic Mass, Even Electron Ions

416 formula(e) evaluated with 3 results within limits (all results (up to 1000) for each mass)

Elements Used:

C: 1-100 H: 1-200 N: 0-6 O: 0-6 S: 1-1 Br: 0-1

Salem/Abdelrahman  
T01311943a 7 (0.255) Cm (5:13)

Sample #25

1: TOF MS ES+  
1.39e+004

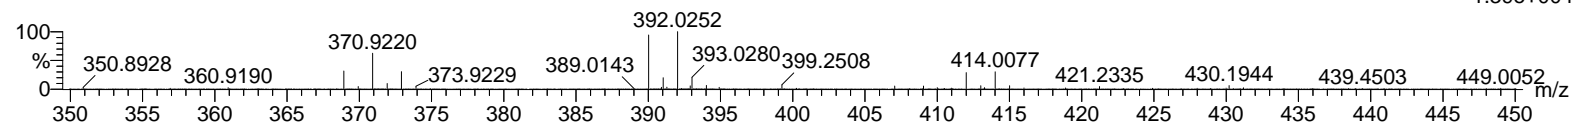

Minimum: -5.0  
Maximum: 5.0 15.0 100.0

| Mass            | Calc. Mass      | mDa  | PPM  | DBE  | i-FIT | i-FIT (Norm) | Formula                  |
|-----------------|-----------------|------|------|------|-------|--------------|--------------------------|
| <b>390.0275</b> | <b>390.0276</b> | -0.1 | -0.3 | 10.5 | 579.4 | 0.0          | <b>C17 H17 N3 O S Br</b> |
|                 | 390.0297        | -2.2 | -5.6 | 17.5 | 613.7 | 34.4         | C18 H8 N5 O4 S           |
|                 | 390.0235        | 4.0  | 10.3 | 6.5  | 593.6 | 14.3         | C12 H17 N5 O3 S Br       |

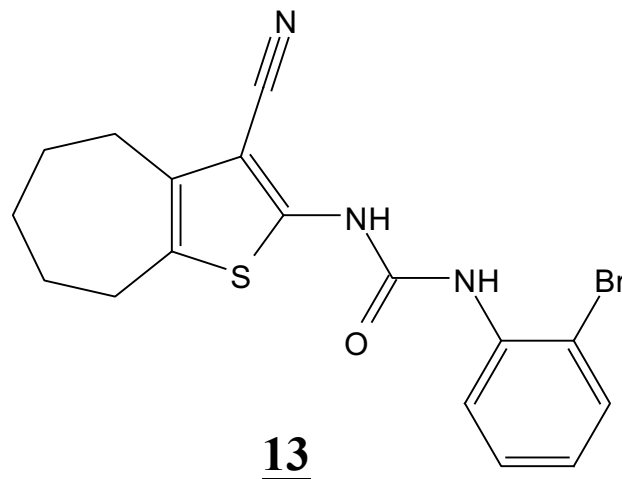

Figure S-28. HRMS of compound 13

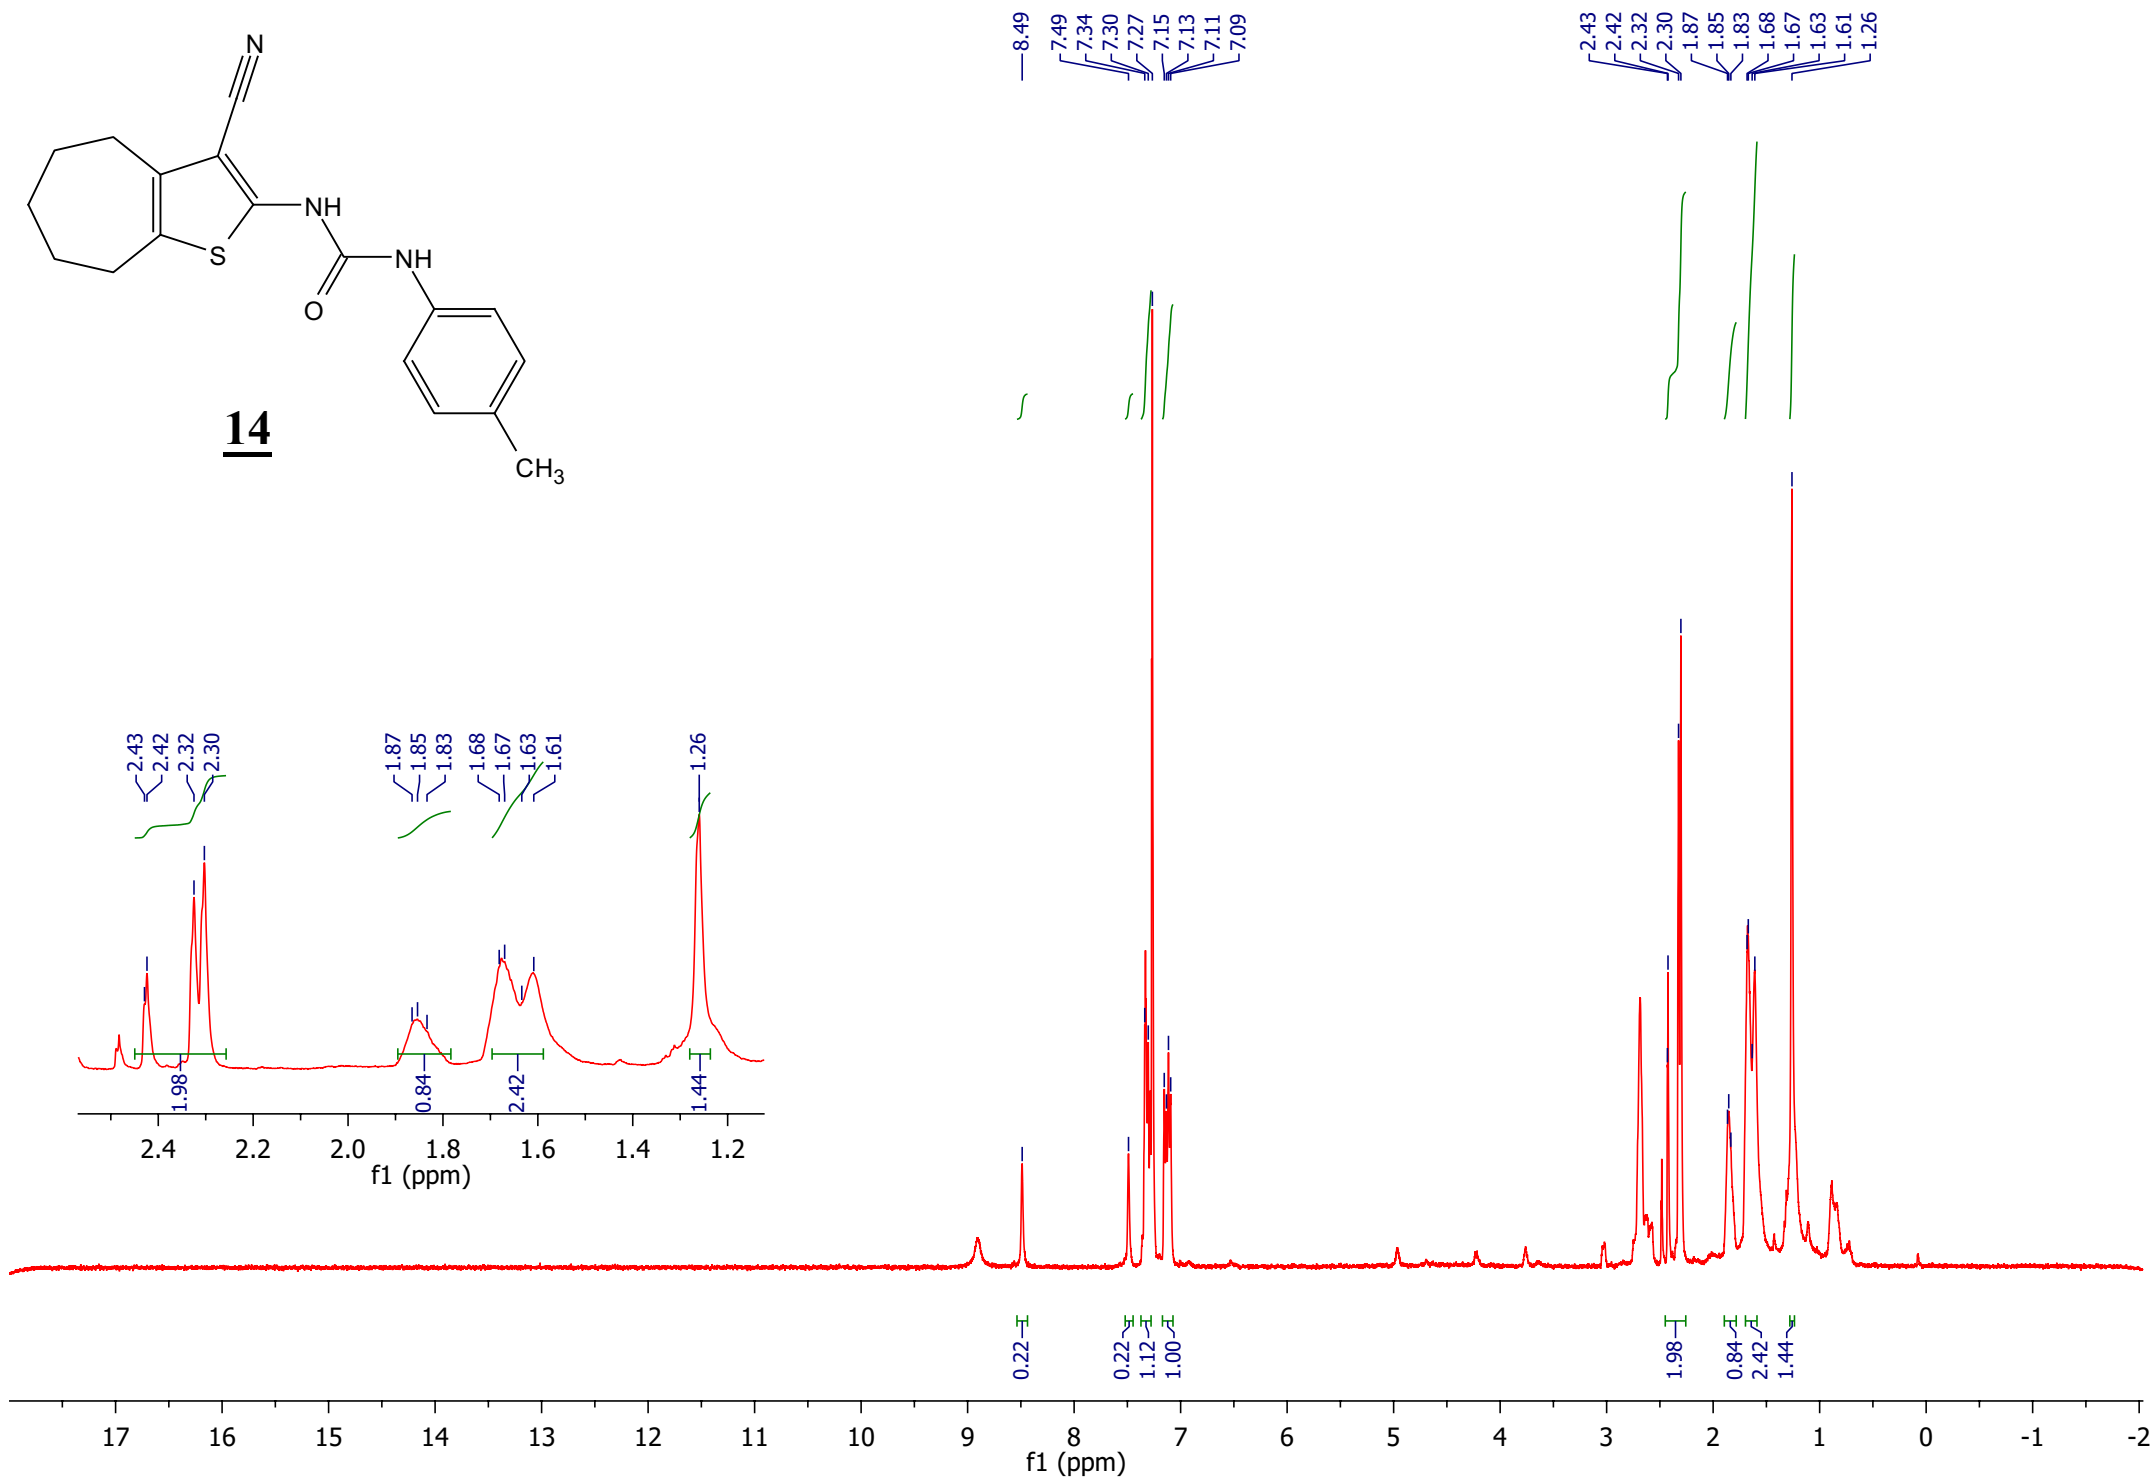

Figure S-29.  $^1\text{H NMR}$  of compound 14



## Elemental Composition Report

### Single Mass Analysis

Tolerance = 5.0 mDa / DBE: min = -5.0, max = 100.0

Element prediction: Off

Number of isotope peaks used for i-FIT = 5

Monoisotopic Mass, Even Electron Ions

339 formula(e) evaluated with 2 results within limits (all results (up to 1000) for each mass)

Elements Used:

C: 1-100 H: 1-200 N: 0-6 O: 0-6 S: 1-1 Br: 0-1

Salem/Abdelrahman  
T01311970a 7 (0.255) Cm (5:13)

Sample #32

1: TOF MS ES+  
4.27e+004

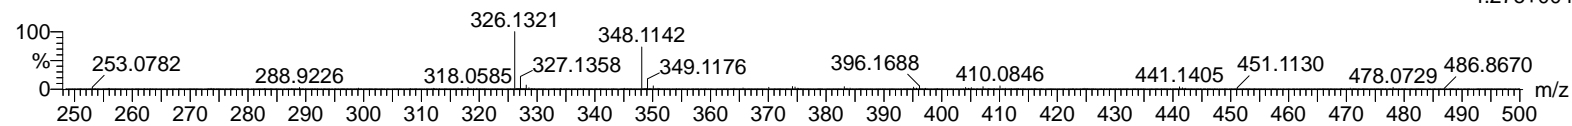

Minimum: -5.0  
Maximum: 5.0 15.0 100.0

| Mass     | Calc. Mass | mDa  | PPM  | DBE  | i-FIT | i-FIT (Norm) | Formula         |
|----------|------------|------|------|------|-------|--------------|-----------------|
| 326.1320 | 326.1327   | -0.7 | -2.1 | 10.5 | 730.1 | 0.0          | C18 H20 N3 O S  |
|          | 326.1287   | 3.3  | 10.1 | 6.5  | 740.9 | 10.9         | C13 H20 N5 O3 S |

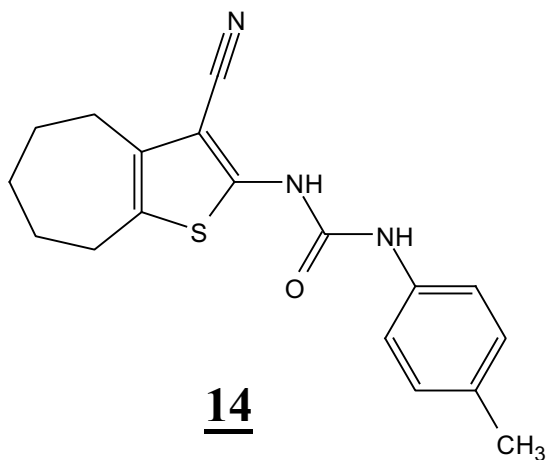

Figure S-30. HRMS of compound 14

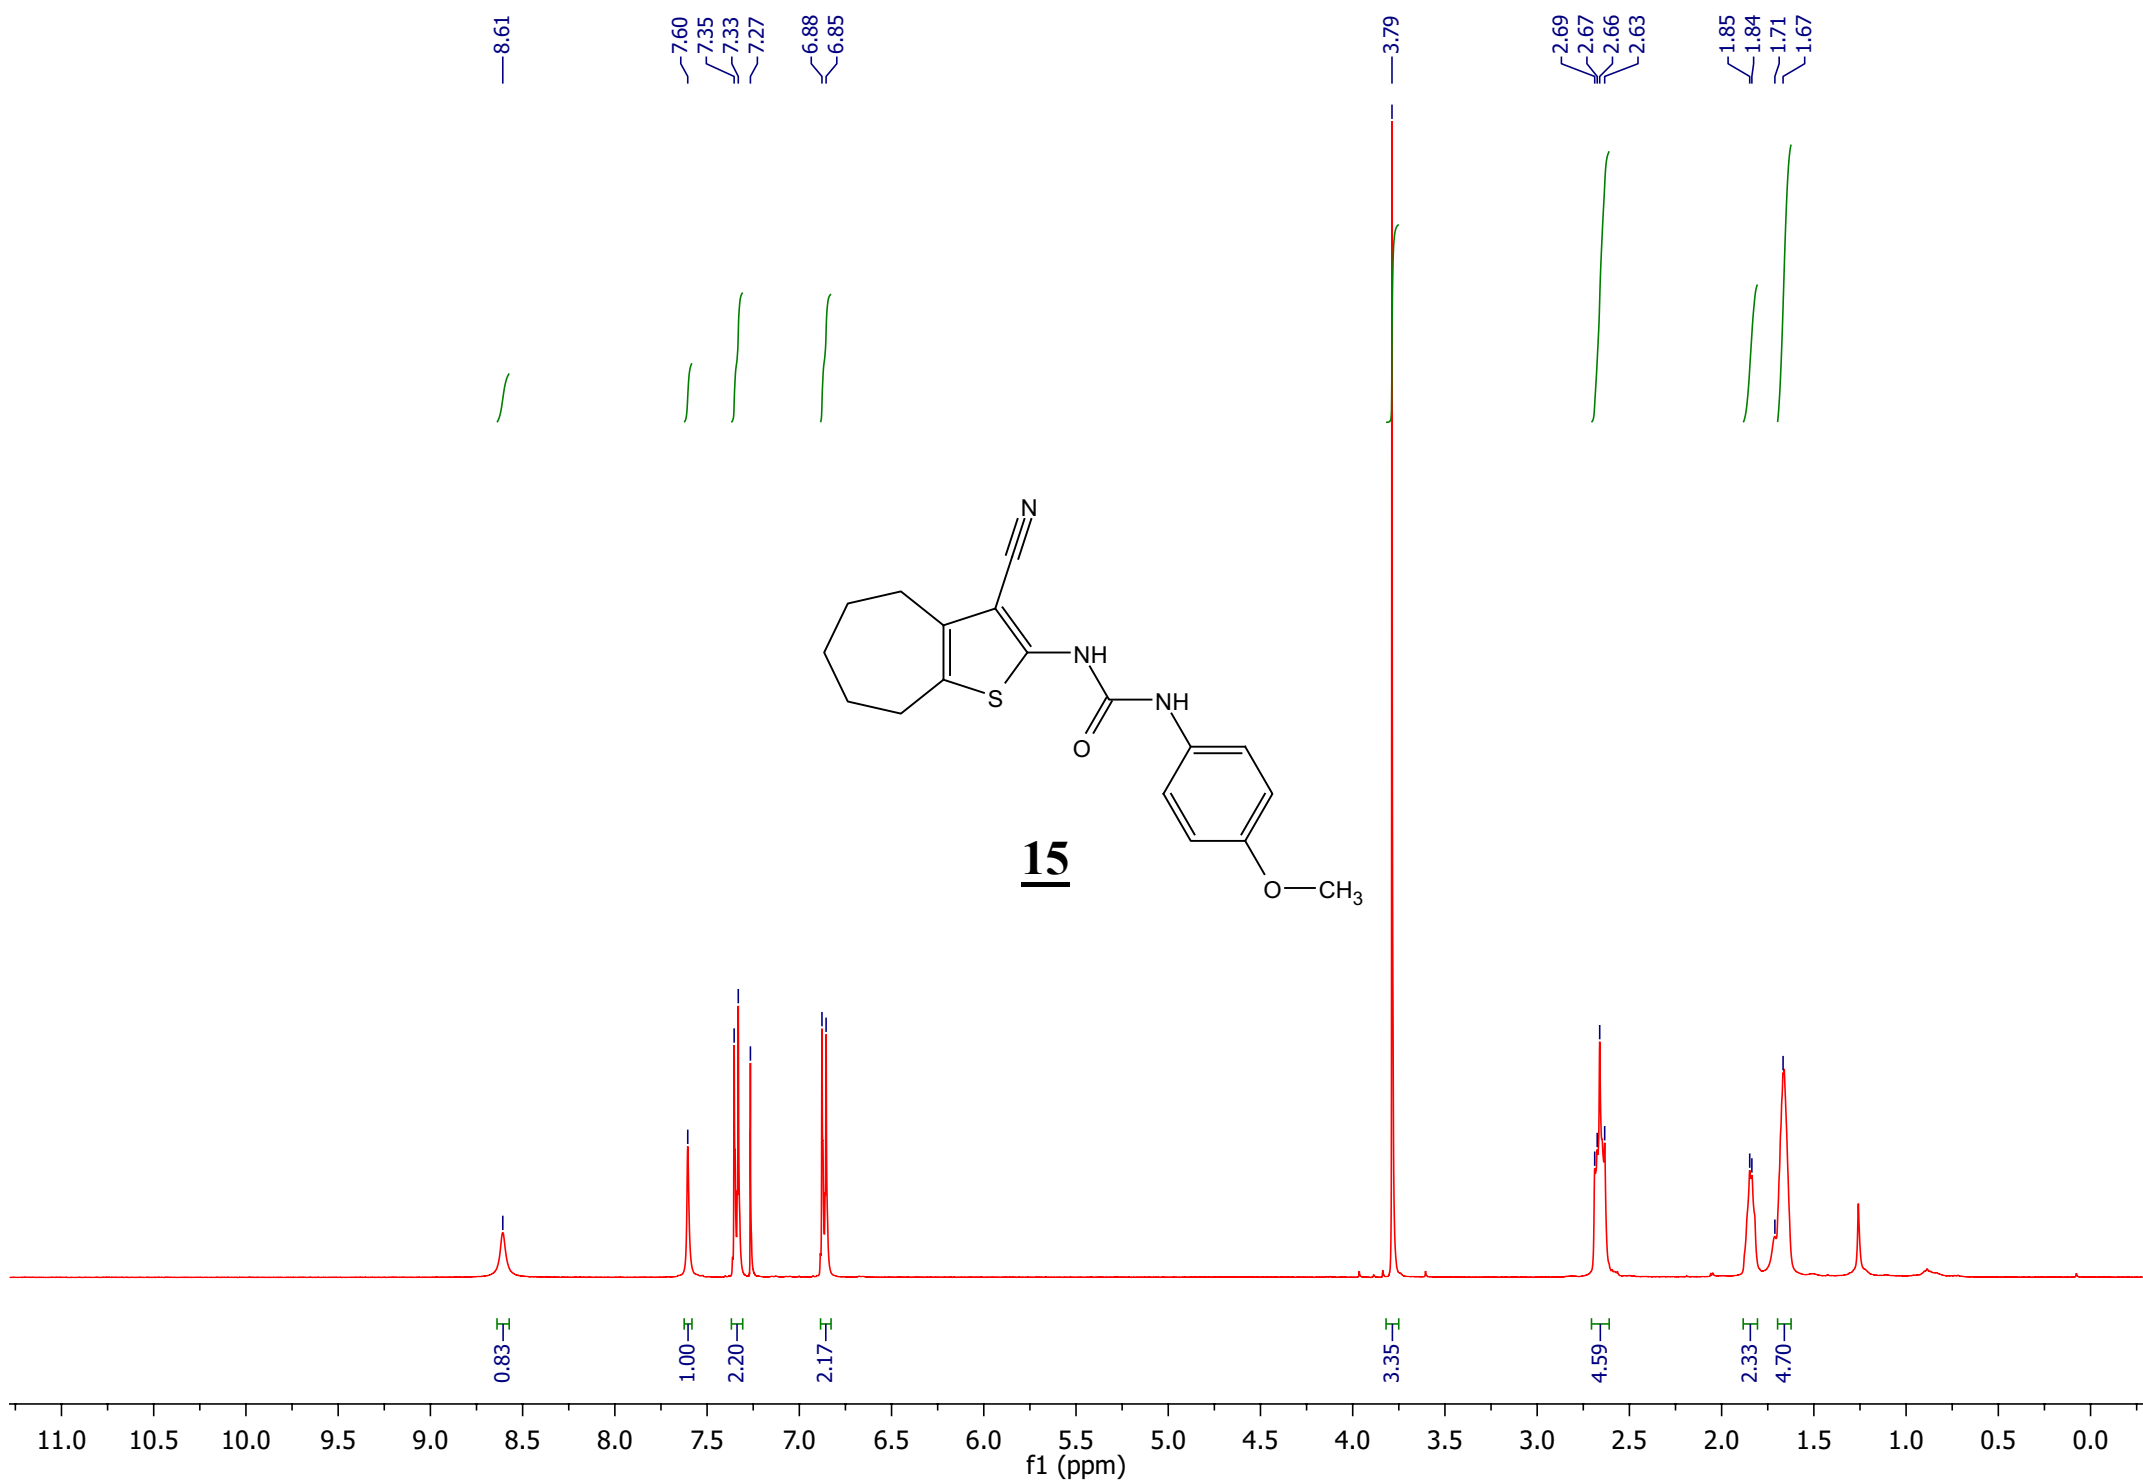

Figure S-31. <sup>1</sup>H NMR of compound 15

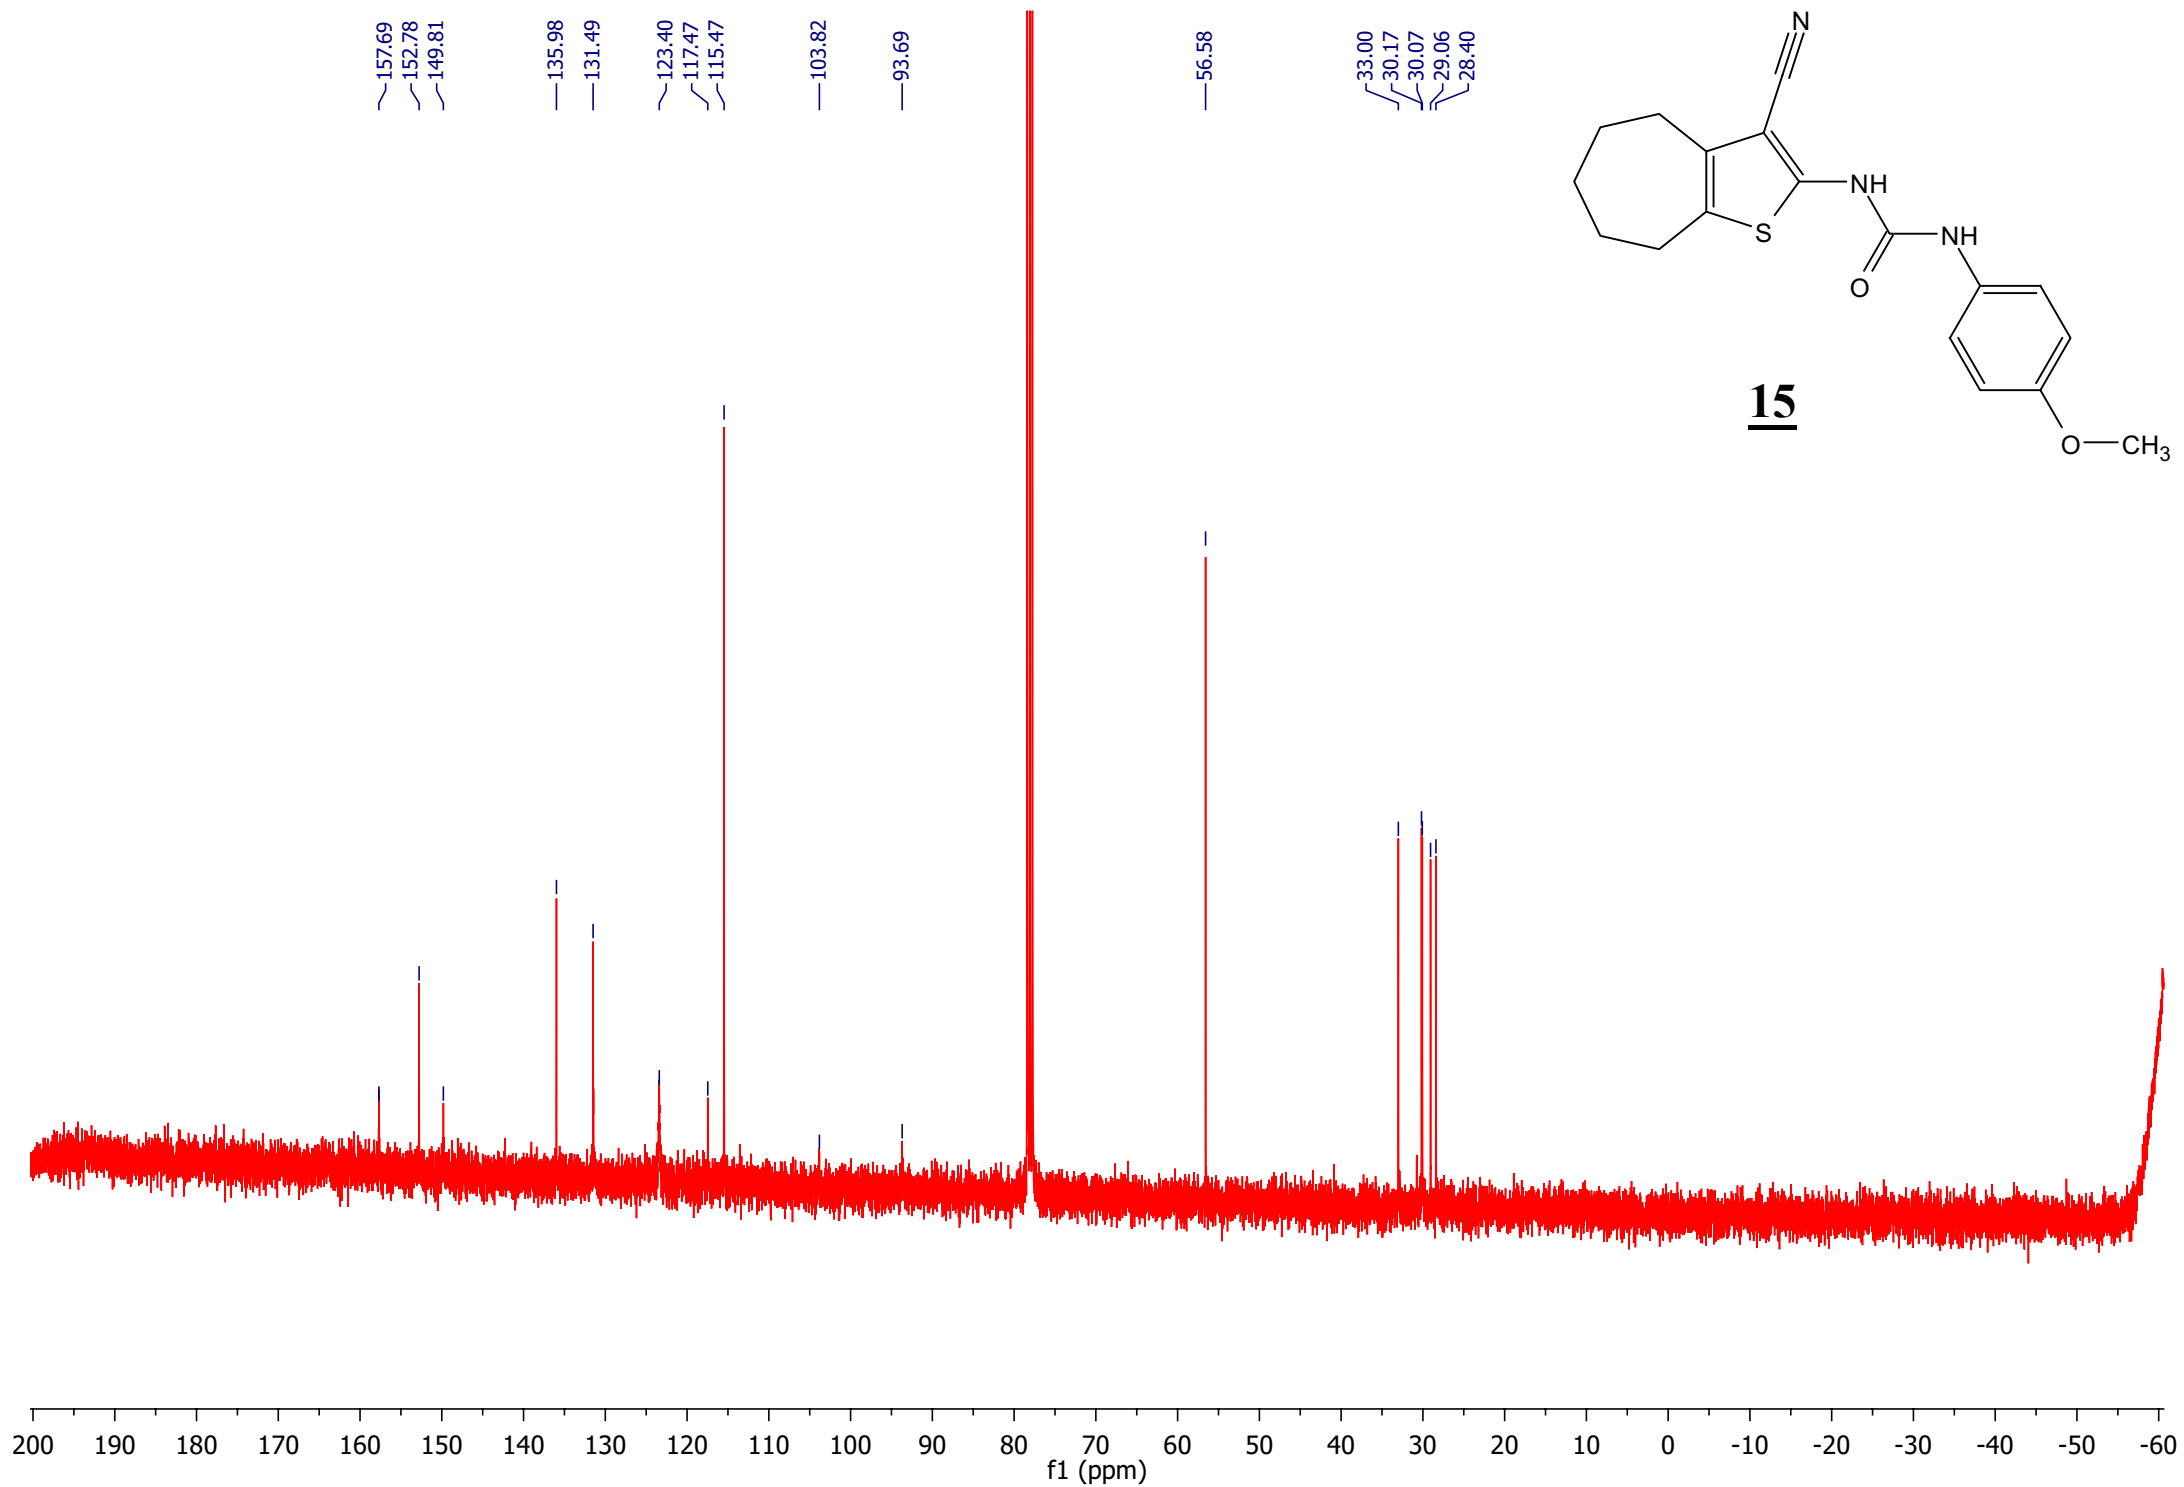

Figure S-32.  $^{13}\text{C}$ NMR of compound 15

## Elemental Composition Report

### Single Mass Analysis

Tolerance = 5.0 mDa / DBE: min = -5.0, max = 100.0

Element prediction: Off

Number of isotope peaks used for i-FIT = 5

Monoisotopic Mass, Even Electron Ions

359 formula(e) evaluated with 3 results within limits (all results (up to 1000) for each mass)

Elements Used:

C: 1-100 H: 1-200 N: 0-6 O: 0-6 S: 1-1 Br: 0-1

Salem/Abdelrahman

Sample #26

T01311947 7 (0.255) Cm (4:12)

1: TOF MS ES+  
3.74e+004

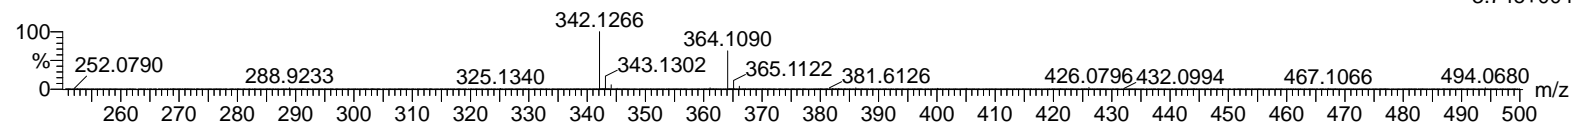

Minimum: -5.0  
Maximum: 5.0 15.0 100.0

| Mass     | Calc. Mass | mDa  | PPM   | DBE  | i-FIT | i-FIT (Norm) | Formula         |
|----------|------------|------|-------|------|-------|--------------|-----------------|
| 342.1267 | 342.1276   | -0.9 | -2.6  | 10.5 | 656.1 | 0.0          | C18 H20 N3 O2 S |
|          | 342.1236   | 3.1  | 9.1   | 6.5  | 667.2 | 11.0         | C13 H20 N5 O4 S |
|          | 342.1316   | -4.9 | -14.3 | 14.5 | 665.9 | 9.7          | C23 H20 N S     |

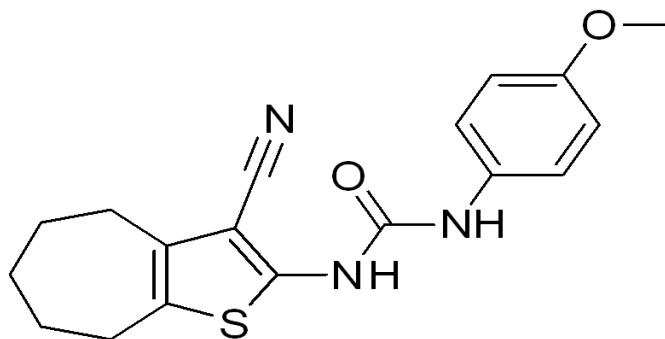

Chemical Formula: C<sub>18</sub>H<sub>19</sub>N<sub>3</sub>O<sub>2</sub>S

15

Figure S-33. HRMS of compound 15

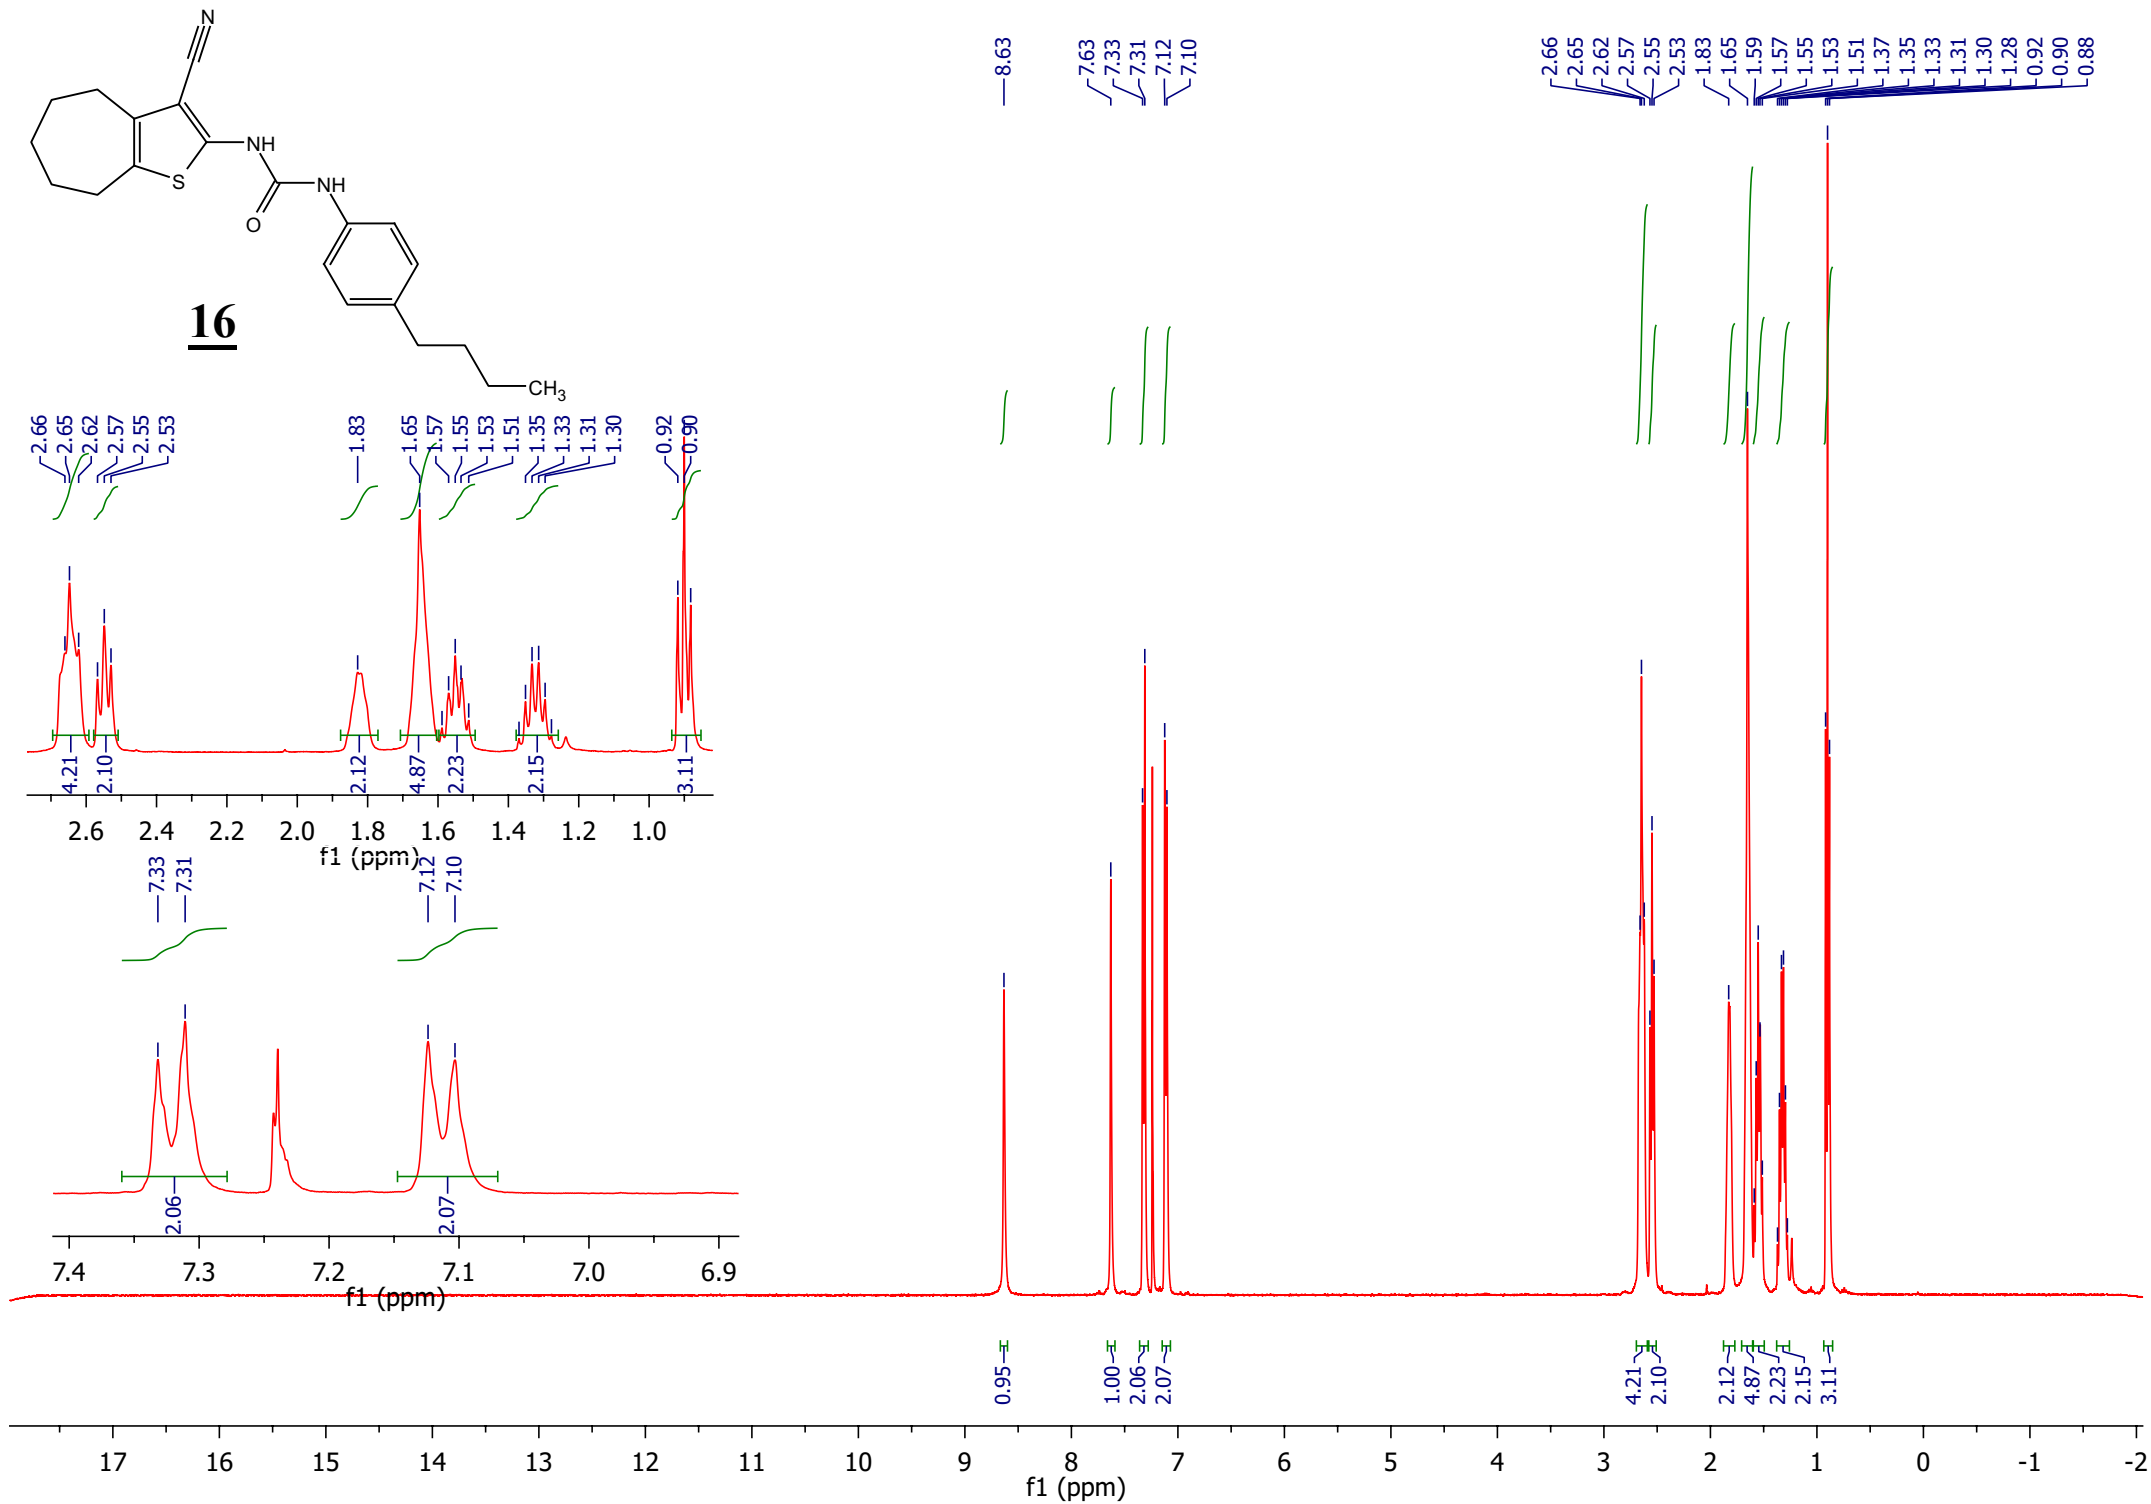

Figure S-34.  $^1\text{H NMR}$  of compound 16

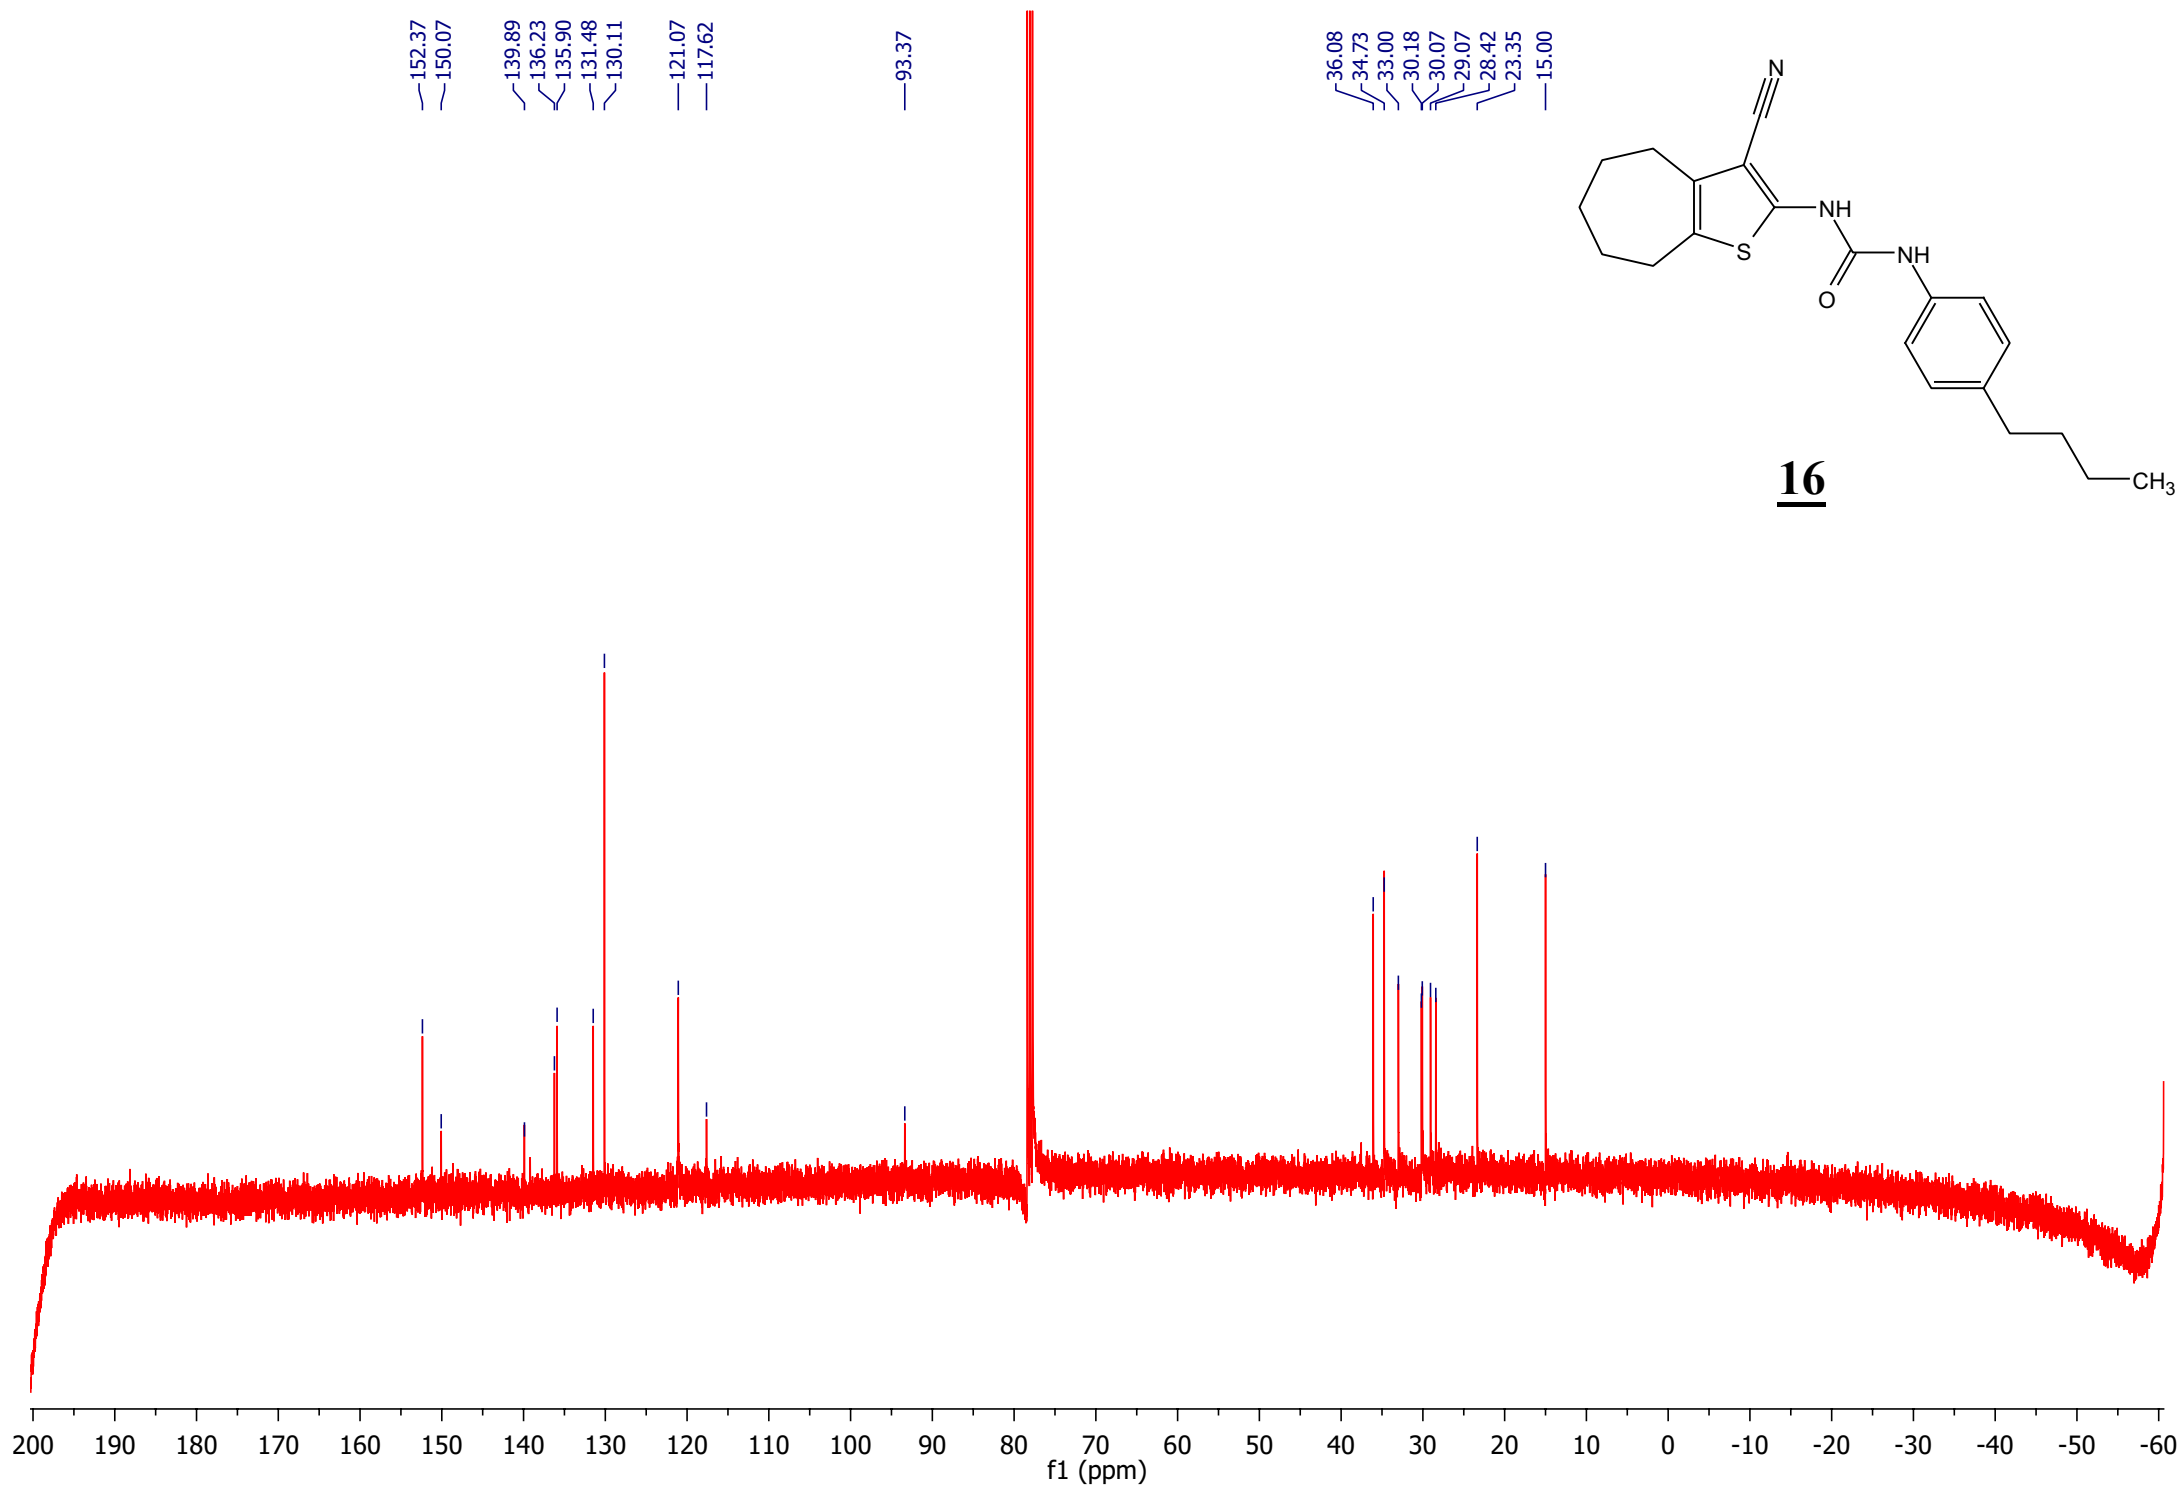

# Elemental Composition Report

## Single Mass Analysis

Tolerance = 5.0 mDa / DBE: min = -5.0, max = 100.0

Element prediction: Off

Number of isotope peaks used for i-FIT = 5

Monoisotopic Mass, Even Electron Ions

388 formula(e) evaluated with 3 results within limits (all results (up to 1000) for each mass)

Elements Used:

C: 1-100 H: 1-200 N: 0-6 O: 0-6 S: 1-1 Br: 0-1

Salem/Abdelrahman  
T01311951 7 (0.255) Cm (6:16)

Sample #27

1: TOF MS ES+  
4.42e+004

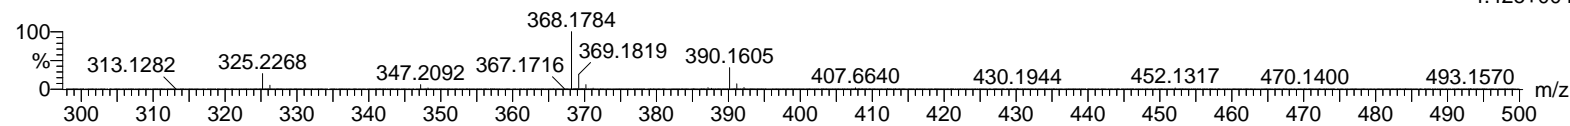

Minimum: -5.0  
Maximum: 5.0 15.0 100.0

| Mass            | Calc. Mass      | mDa  | PPM  | DBE  | i-FIT | i-FIT (Norm) | Formula               |
|-----------------|-----------------|------|------|------|-------|--------------|-----------------------|
| <b>368.1784</b> | <b>368.1797</b> | -1.3 | -3.5 | 10.5 | 666.0 | 0.0          | <b>C21 H26 N3 O S</b> |
|                 | 368.1756        | 2.8  | 7.6  | 6.5  | 679.8 | 13.8         | C16 H26 N5 O3 S       |
|                 | 368.1735        | 4.9  | 13.3 | -0.5 | 700.0 | 34.1         | C15 H35 N3 S Br       |

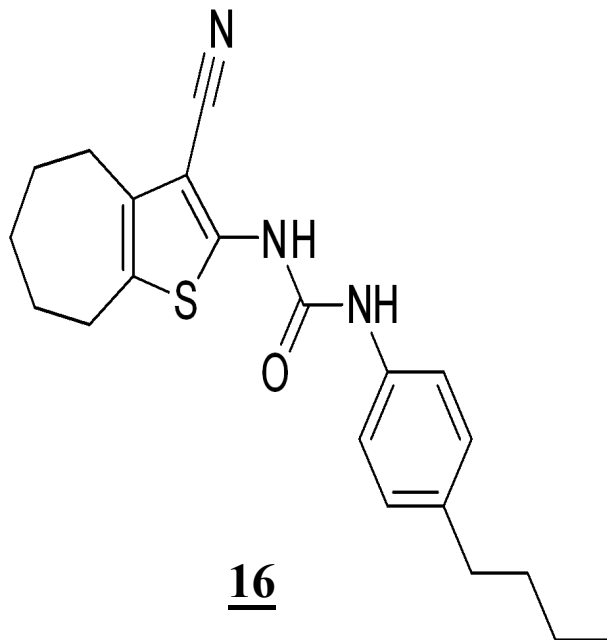

Chemical Formula: C<sub>21</sub>H<sub>25</sub>N<sub>3</sub>OS

Figure S-36. HRMS of compound 16

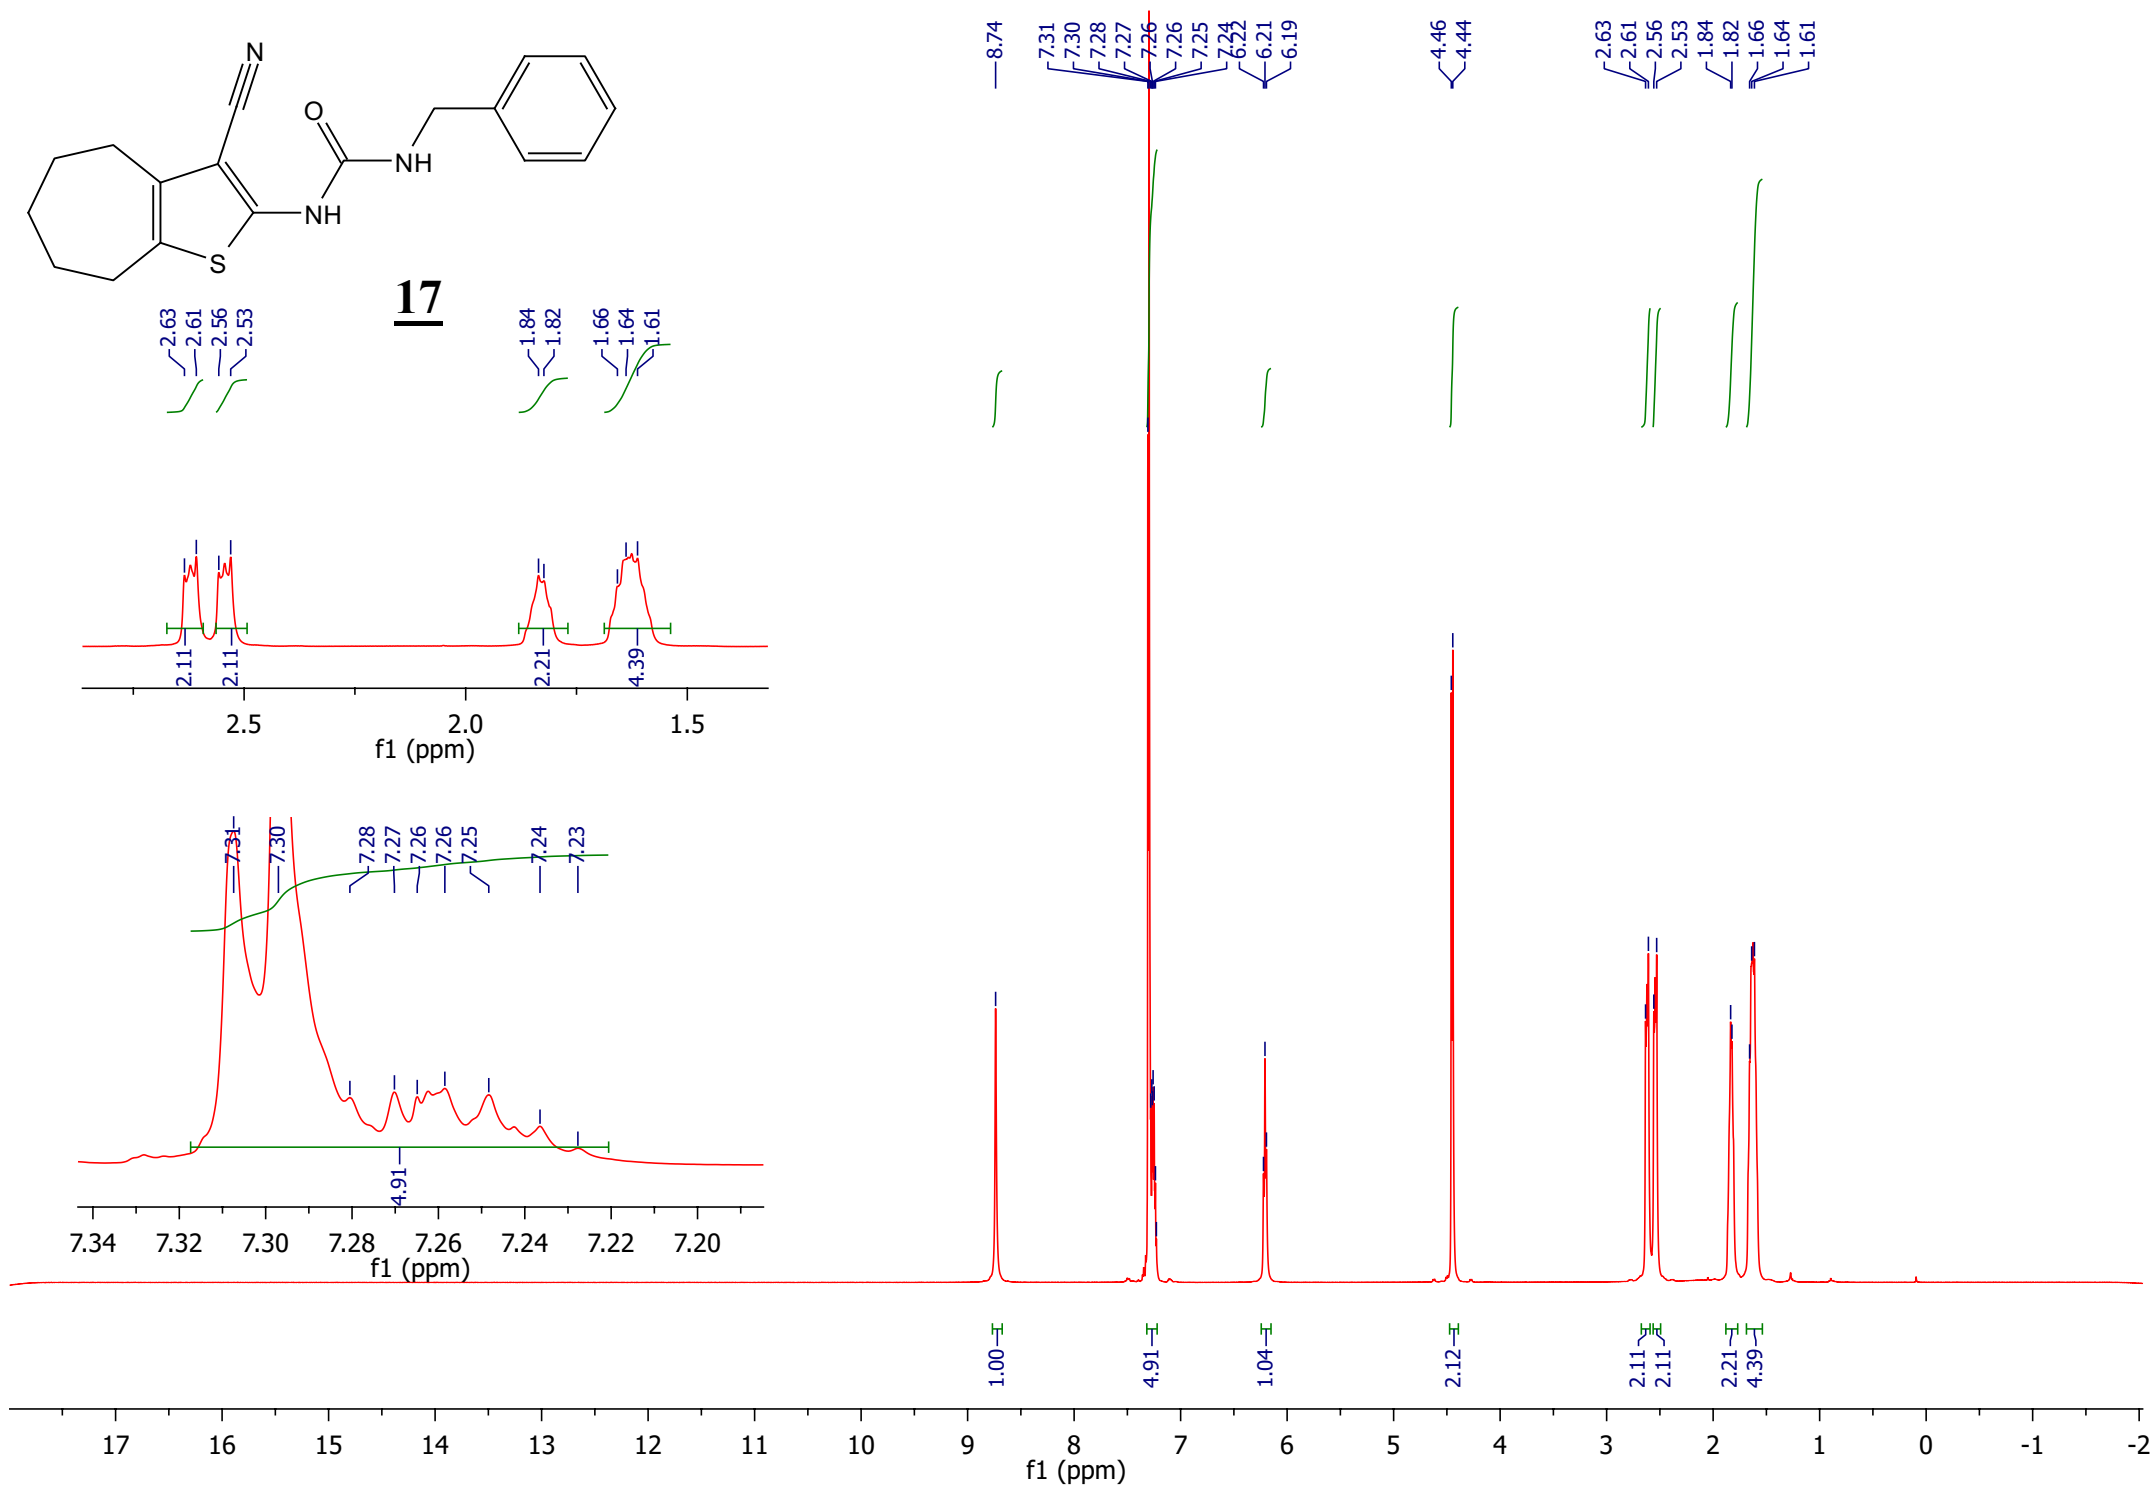

Figure S-37.  $^1\text{H}$ NMR of compound 17



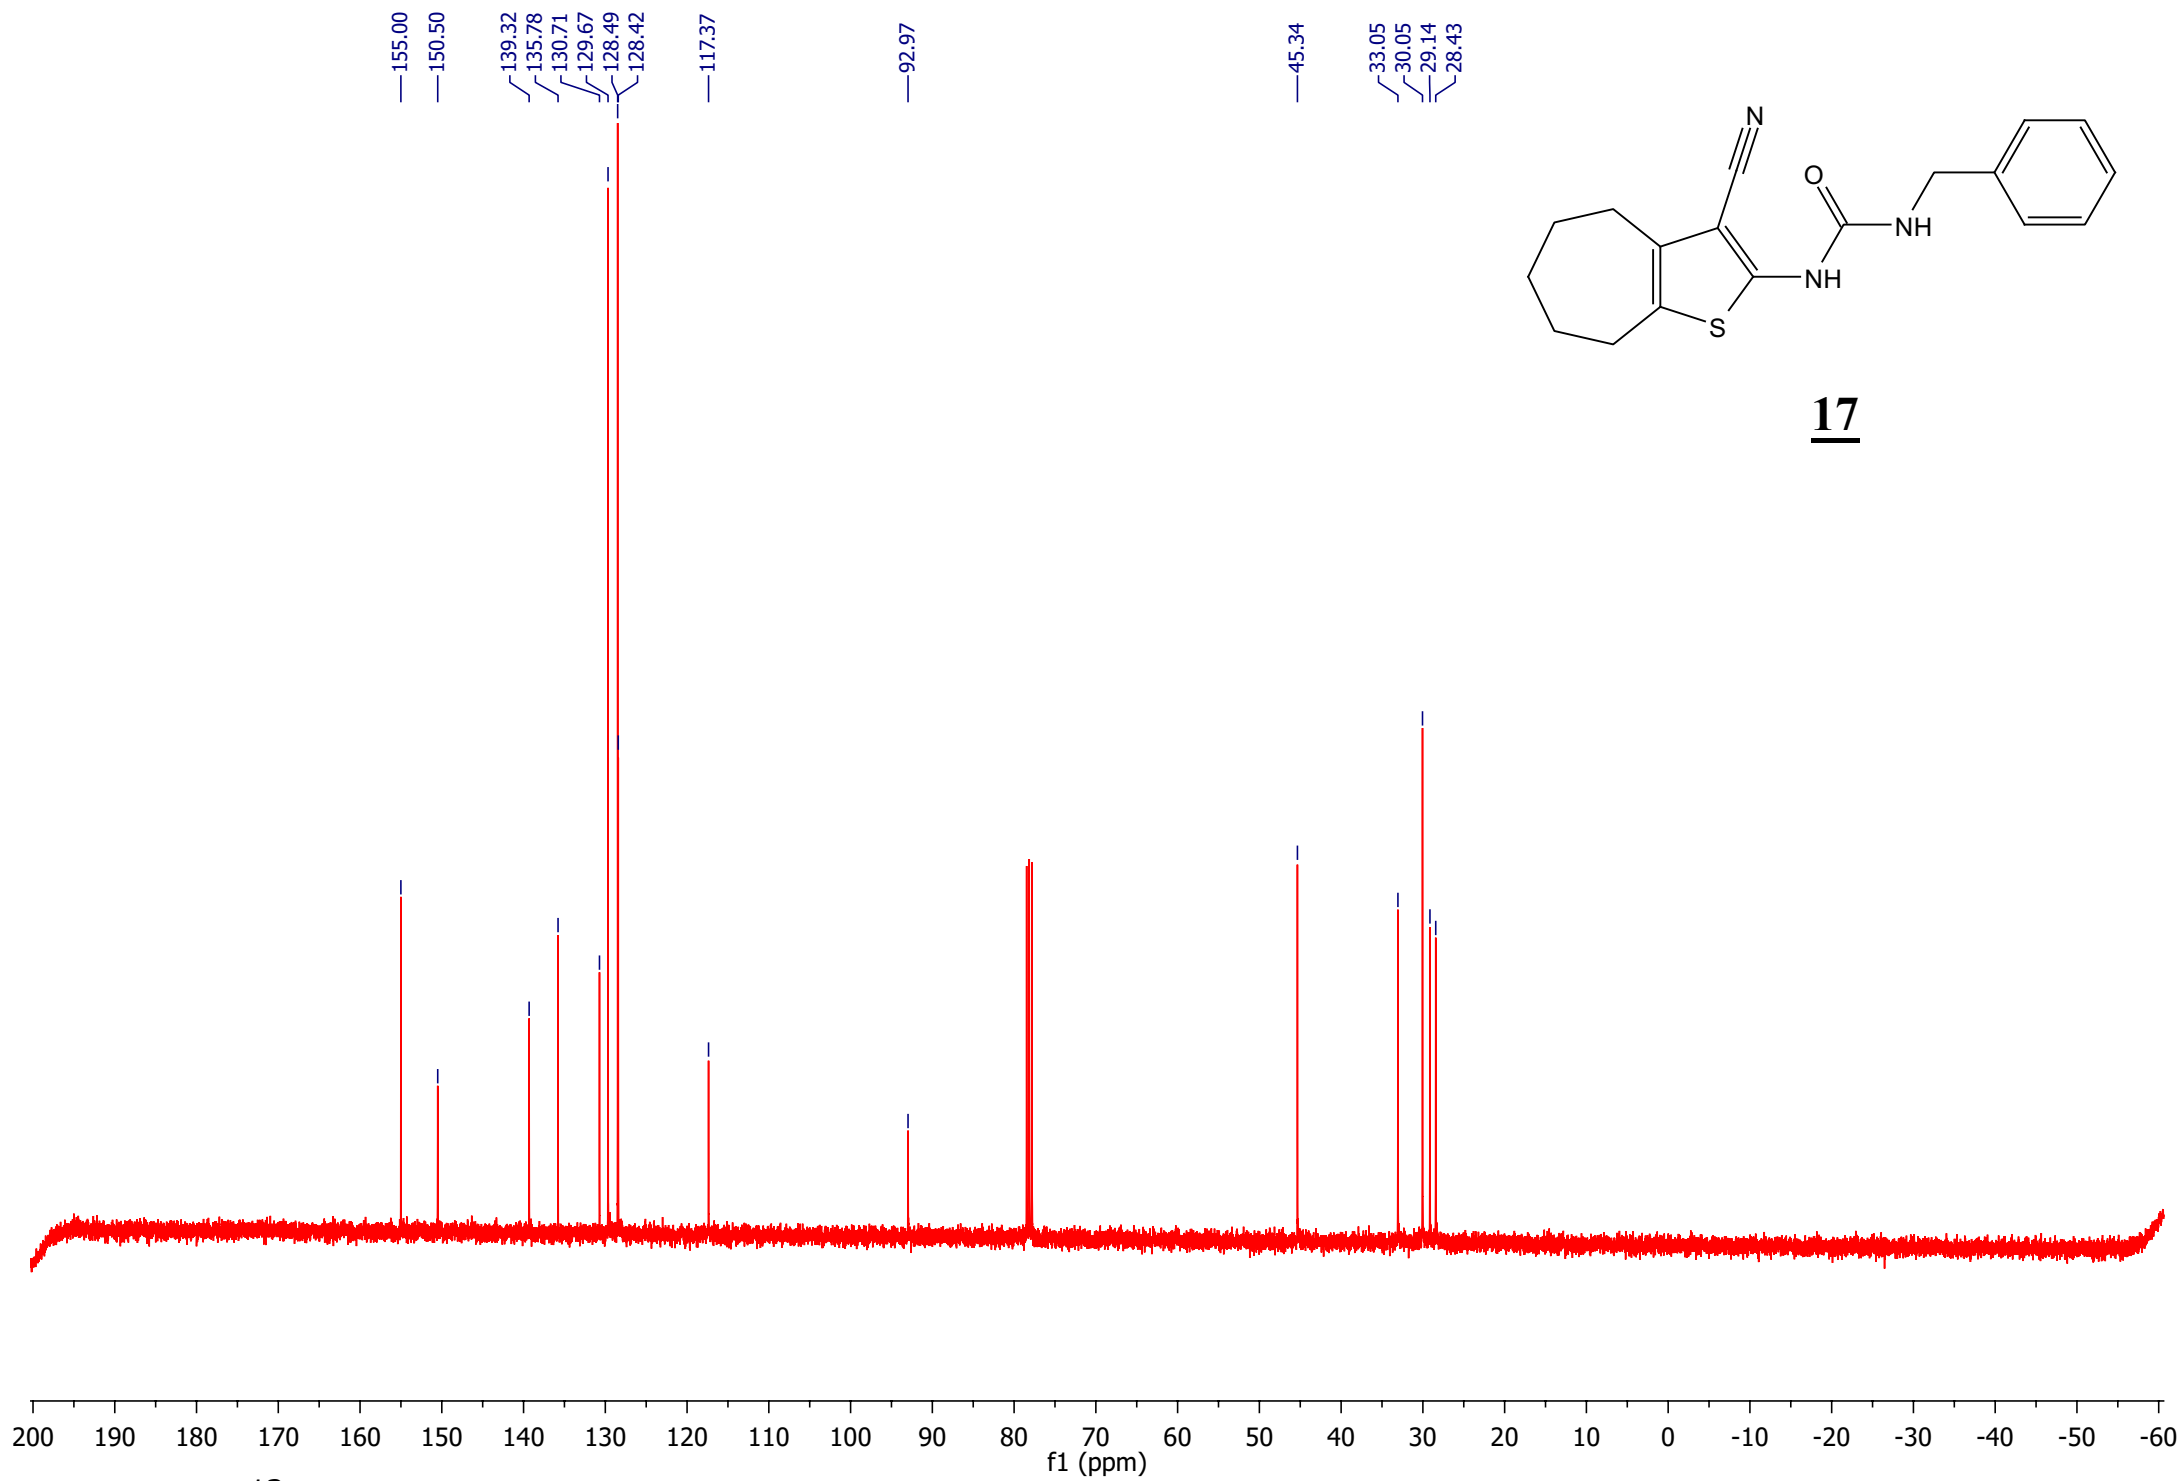

Figure S-38. <sup>13</sup>CNMR of compound 17

## Elemental Composition Report

### Single Mass Analysis

Tolerance = 5.0 mDa / DBE: min = -5.0, max = 100.0

Element prediction: Off

Number of isotope peaks used for i-FIT = 5

Monoisotopic Mass, Even Electron Ions

339 formula(e) evaluated with 2 results within limits (all results (up to 1000) for each mass)

Elements Used:

C: 1-100 H: 1-200 N: 0-6 O: 0-6 S: 1-1 Br: 0-1

Salem/Abdelrahman

Sample #30

T01311962 7 (0.255) Cm (4:12)

1: TOF MS ES+  
4.48e+004

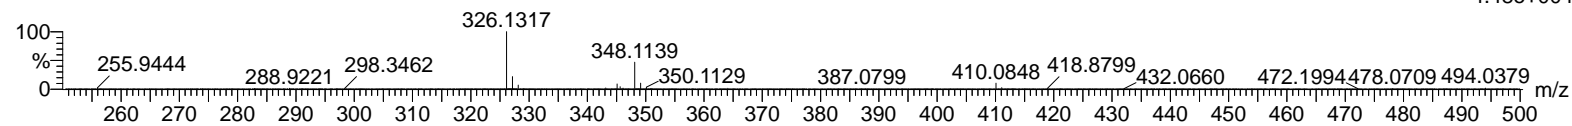

Minimum: -5.0  
Maximum: 5.0 15.0 100.0

| Mass            | Calc. Mass      | mDa  | PPM  | DBE  | i-FIT | i-FIT (Norm) | Formula               |
|-----------------|-----------------|------|------|------|-------|--------------|-----------------------|
| <b>326.1317</b> | <b>326.1327</b> | -1.0 | -3.1 | 10.5 | 675.9 | 0.0          | <b>C18 H20 N3 O S</b> |
|                 | 326.1287        | 3.0  | 9.2  | 6.5  | 689.9 | 14.0         | C13 H20 N5 O3 S       |

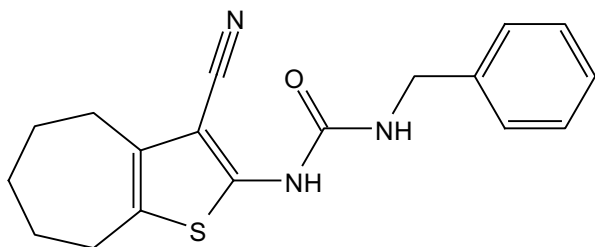

**17**
